# Supplementary material for: A pyroptosis expression pattern score predicts prognosis and immune microenvironment of lung squamous cell carcinoma
Source: Front Genet. 2022 Nov 10;13:996444. doi: 10.3389/fgene.2022.996444 (PMC9685532; doi:10.3389/fgene.2022.996444)
Supplement: Supplementary file 1 [file Table2.XLSX]

## Sheet: GO
Table S1. GO terms and KEGG pathway analysis on the yellow and tuquorise modules
ONTOLOGY	ID	Description	GeneRatio	BgRatio	pvalue	p.adjust	qvalue	geneID	Count
BP	GO:0002526	acute inflammatory response	16/331	107/18862	5.77178e-11	1.68802e-07	1.29329e-07	IL6/FN1/OSM/TNF/CD163/VNN1/SAA1/C3/GATA3/NLRP3/FCGR2B/ADORA1/TREM1/SAA2/IL1B/IL1A	16
BP	GO:0022409	positive regulation of cell-cell adhesion	24/331	276/18862	1.28339e-10	1.68802e-07	1.29329e-07	IL6/CCL2/HLA-DPA1/ALOX15/TNF/LILRB2/VNN1/FGA/FGG/CD74/GATA3/NLRP3/HLA-DRB1/HLA-DRA/CD80/IL1B/SIRPB1/HLA-DMB/CCR2/PTAFR/DPP4/IL1A/SOX2/SHH	24
BP	GO:0070372	regulation of ERK1 and ERK2 cascade	25/331	301/18862	1.39353e-10	1.68802e-07	1.29329e-07	DUSP1/FN1/CCL2/CCL7/ALOX15/TNF/FGA/FGG/C5AR2/CD74/HLA-DRB1/NECAB2/GPR183/DUSP4/CAMK2N1/LMO3/FPR2/EPHA7/CSF1R/IL1B/BMP2/AKAP12/CCR1/CCL8/P2RY1	25
BP	GO:0042445	hormone metabolic process	21/331	218/18862	2.90606e-10	2.64016e-07	2.02277e-07	CYP27B1/ADH1C/AKR1C4/GATA3/CYP1B1/KLK6/CYP2C18/DHRS2/SLC5A5/BMP2/PCSK2/RDH12/FOXE1/CES1/UGT1A7/AKR1C2/ADH7/AKR1B10/ALDH8A1/CYP26A1/SHH	21
BP	GO:0070371	ERK1 and ERK2 cascade	25/331	320/18862	5.07088e-10	3.68551e-07	2.82368e-07	DUSP1/FN1/CCL2/CCL7/ALOX15/TNF/FGA/FGG/C5AR2/CD74/HLA-DRB1/NECAB2/GPR183/DUSP4/CAMK2N1/LMO3/FPR2/EPHA7/CSF1R/IL1B/BMP2/AKAP12/CCR1/CCL8/P2RY1	25
BP	GO:0001819	positive regulation of cytokine production	29/331	437/18862	9.3901e-10	4.87481e-07	3.73486e-07	CSF2/EREG/IL6/CCBE1/HLA-DPA1/OSM/TNF/LILRB2/SAA1/TLR8/C3/PAEP/CD74/MNDA/GATA3/NLRP3/CYP1B1/LILRA5/FCN1/IL1RL1/CD80/CSF1R/IL1B/NLRP2/TSLP/CCR2/PTAFR/TLR7/IL1A	29
BP	GO:0022407	regulation of cell-cell adhesion	29/331	437/18862	9.3901e-10	4.87481e-07	3.73486e-07	IL6/CCL2/HLA-DPA1/ALOX15/TNF/LILRB2/VNN1/FGA/FGG/CD74/GATA3/NLRP3/HLA-DRB1/HLA-DRA/FCGR2B/EPHA7/CD80/IL1B/SIRPB1/HLA-DMB/BMP2/VSIG4/CCR2/PTAFR/DPP4/MUC21/IL1A/SOX2/SHH	29
BP	GO:0070268	cornification	15/331	113/18862	1.28856e-09	5.85326e-07	4.48451e-07	KRT13/KRT33A/KRT7/SPRR1A/KRT40/SPRR2F/KRT24/SPRR3/KRT31/KLK5/RPTN/KRT20/KRT81/KRT74/KRT77	15
BP	GO:0045785	positive regulation of cell adhesion	28/331	425/18862	2.17752e-09	8.79236e-07	6.73632e-07	IL6/FN1/CCL2/HLA-DPA1/ALOX15/TNF/LILRB2/VNN1/FGA/SAA1/FGG/CD74/GATA3/NLRP3/HLA-DRB1/TGM2/HLA-DRA/CD80/IL1B/SIRPB1/HLA-DMB/CCR2/PTAFR/NDNF/DPP4/IL1A/SOX2/SHH	28
BP	GO:0008544	epidermis development	29/331	463/18862	3.51265e-09	1.2765e-06	9.77997e-07	EREG/KRT13/CYP27B1/CST6/KRT33A/SNAI1/TNF/KRT7/SPRR1A/KRT40/SPRR2F/LCE1F/HLA-DRB1/KRT24/SPRR3/KRT31/TGM3/MYCL/KLK5/RPTN/KRT20/INHBA/KRT81/KRT74/USH1C/FOXE1/SHH/SOX21/KRT77	29
BP	GO:0043588	skin development	27/331	415/18862	5.58037e-09	1.84355e-06	1.41245e-06	EREG/KRT13/CYP27B1/KRT33A/SNAI1/TNF/KRT7/SPRR1A/ITGB6/KRT40/SPRR2F/LCE1F/KRT24/SPRR3/KRT31/TGM3/KLK5/RPTN/KRT20/INHBA/KRT81/KRT74/FOXE1/DACT2/SHH/SOX21/KRT77	27
BP	GO:1903039	positive regulation of leukocyte cell-cell adhesion	20/331	234/18862	6.25184e-09	1.89326e-06	1.45054e-06	IL6/CCL2/HLA-DPA1/TNF/LILRB2/VNN1/CD74/GATA3/NLRP3/HLA-DRB1/HLA-DRA/CD80/IL1B/SIRPB1/HLA-DMB/CCR2/PTAFR/DPP4/IL1A/SHH	20
BP	GO:0007159	leukocyte cell-cell adhesion	25/331	366/18862	7.95026e-09	2.2224e-06	1.70271e-06	IL6/CCL2/HLA-DPA1/TNF/LILRB2/VNN1/CD74/GATA3/NLRP3/HLA-DRB1/HLA-DRA/FCGR2B/OLR1/CD80/IL1B/SIRPB1/HLA-DMB/NT5E/SELPLG/VSIG4/CCR2/PTAFR/DPP4/IL1A/SHH	25
BP	GO:0006959	humoral immune response	25/331	380/18862	1.67966e-08	4.35992e-06	3.34038e-06	IL6/HLA-DQB1/CCL2/TNF/PPBP/FGA/C3/C5AR2/GATA3/HLA-DRB1/GPR183/COLEC10/CXCL5/FCGR2B/COLEC11/FCN1/CXCL11/TREM1/C1QA/IL1B/KLK5/CFB/CXCL10/LYZ/VSIG4	25
BP	GO:0030595	leukocyte chemotaxis	19/331	226/18862	1.97086e-08	4.77473e-06	3.65819e-06	DUSP1/IL6/CCL2/CCL7/PPBP/VEGFC/SAA1/C5AR2/CD74/GPR183/CXCL5/CXCL11/FPR2/CSF1R/CXCL10/CCR2/CCR1/CCL8/DPP4	19
BP	GO:0071219	cellular response to molecule of bacterial origin	18/331	209/18862	3.22685e-08	6.67046e-06	5.11061e-06	CSF2/IL6/CCL2/TNF/LILRB2/PPBP/NLRP3/CSF3/CXCL5/FCGR2B/CXCL11/CD80/IL1B/NOS2/CXCL10/TNFRSF1B/PTAFR/IL1A	18
BP	GO:0032755	positive regulation of interleukin-6 production	12/331	86/18862	3.34304e-08	6.67046e-06	5.11061e-06	EREG/IL6/TNF/LILRB2/TLR8/CD74/LILRA5/IL1B/TSLP/PTAFR/TLR7/IL1A	12
BP	GO:0070374	positive regulation of ERK1 and ERK2 cascade	18/331	210/18862	3.47385e-08	6.67046e-06	5.11061e-06	CCL2/CCL7/ALOX15/TNF/FGA/FGG/C5AR2/CD74/HLA-DRB1/NECAB2/GPR183/FPR2/CSF1R/BMP2/AKAP12/CCR1/CCL8/P2RY1	18
BP	GO:0050727	regulation of inflammatory response	24/331	366/18862	3.48758e-08	6.67046e-06	5.11061e-06	SIGLEC10/IL6/FABP4/OSM/ALOX15/TNF/SAA1/C3/GATA3/NLRP3/HLA-DRB1/SMPDL3B/TGM2/LILRA5/FCGR2B/ADORA1/FPR2/IL1RL1/IL1B/NT5E/TSLP/TNFRSF1B/CCR2/TLR7	24
BP	GO:0050870	positive regulation of T cell activation	18/331	212/18862	4.02068e-08	7.30557e-06	5.59721e-06	IL6/CCL2/HLA-DPA1/LILRB2/VNN1/CD74/GATA3/NLRP3/HLA-DRB1/HLA-DRA/CD80/IL1B/SIRPB1/HLA-DMB/CCR2/DPP4/IL1A/SHH	18
BP	GO:0071674	mononuclear cell migration	17/331	190/18862	4.46619e-08	7.72863e-06	5.92134e-06	DUSP1/IL6/CCL2/CCL7/TNF/SAA1/GATA3/GPR183/CXCL11/GPR15/FPR2/CSF1R/CXCL10/CCR2/CCR1/CCL8/ARTN	17
BP	GO:0097529	myeloid leukocyte migration	18/331	218/18862	6.16998e-08	1.01917e-05	7.80842e-06	DUSP1/IL6/CCL2/CCL7/PPBP/VEGFC/SAA1/C5AR2/CD74/CXCL5/CXCL11/FPR2/CSF1R/CXCL10/CCR2/CCR1/CCL8/DPP4	18
BP	GO:0071222	cellular response to lipopolysaccharide	17/331	197/18862	7.59651e-08	1.20025e-05	9.19577e-06	CSF2/IL6/CCL2/TNF/LILRB2/PPBP/NLRP3/CSF3/CXCL5/CXCL11/CD80/IL1B/NOS2/CXCL10/TNFRSF1B/PTAFR/IL1A	17
BP	GO:1903037	regulation of leukocyte cell-cell adhesion	22/331	330/18862	9.86632e-08	1.49393e-05	1.14458e-05	IL6/CCL2/HLA-DPA1/TNF/LILRB2/VNN1/CD74/GATA3/NLRP3/HLA-DRB1/HLA-DRA/FCGR2B/CD80/IL1B/SIRPB1/HLA-DMB/VSIG4/CCR2/PTAFR/DPP4/IL1A/SHH	22
BP	GO:0034754	cellular hormone metabolic process	14/331	136/18862	1.23571e-07	1.79623e-05	1.3762e-05	ADH1C/AKR1C4/CYP1B1/CYP2C18/DHRS2/BMP2/RDH12/UGT1A7/AKR1C2/ADH7/AKR1B10/ALDH8A1/CYP26A1/SHH	14
BP	GO:0002685	regulation of leukocyte migration	17/331	205/18862	1.35475e-07	1.89353e-05	1.45074e-05	DUSP1/IL6/CCL2/CCL7/TNF/VEGFC/C5AR2/CD74/ADORA1/FPR2/CSF1R/CXCL10/CCR2/CCR1/PTAFR/CCL8/DPP4	17
BP	GO:0071216	cellular response to biotic stimulus	18/331	233/18862	1.69009e-07	2.25798e-05	1.72996e-05	CSF2/IL6/CCL2/TNF/LILRB2/PPBP/NLRP3/CSF3/CXCL5/FCGR2B/CXCL11/CD80/IL1B/NOS2/CXCL10/TNFRSF1B/PTAFR/IL1A	18
BP	GO:0002688	regulation of leukocyte chemotaxis	13/331	119/18862	1.73978e-07	2.25798e-05	1.72996e-05	DUSP1/IL6/CCL2/CCL7/VEGFC/C5AR2/CD74/FPR2/CSF1R/CXCL10/CCR2/CCR1/DPP4	13
BP	GO:0006805	xenobiotic metabolic process	13/331	120/18862	1.92072e-07	2.40686e-05	1.84403e-05	GSTM1/RORC/CYP1B1/CYP2C18/UGT1A10/AADAC/GSTA1/CYP2A6/ALDH3A1/CES1/UGT1A7/GSTM3/CYP26A1	13
BP	GO:0042116	macrophage activation	12/331	102/18862	2.29859e-07	2.78436e-05	2.13325e-05	CSF2/IL6/TNF/TLR8/CD74/ITGAM/FCGR2B/FPR2/IL1RL1/C1QA/VSIG4/TLR7	12
BP	GO:0070663	regulation of leukocyte proliferation	18/331	241/18862	2.79706e-07	3.27888e-05	2.51213e-05	IL6/HLA-DPA1/LILRB2/CD74/MNDA/HLA-DRB1/GPR183/FCGR2B/CD80/CSF1R/IL1B/HLA-DMB/TNFRSF1B/VSIG4/CCR2/CCL8/IL1A/SHH	18
BP	GO:0071466	cellular response to xenobiotic stimulus	13/331	125/18862	3.10408e-07	3.46237e-05	2.65272e-05	GSTM1/RORC/CYP1B1/CYP2C18/UGT1A10/AADAC/GSTA1/CYP2A6/ALDH3A1/CES1/UGT1A7/GSTM3/CYP26A1	13
BP	GO:0050867	positive regulation of cell activation	24/331	412/18862	3.14415e-07	3.46237e-05	2.65272e-05	IL6/CCL2/HLA-DPA1/LILRB2/VNN1/CD74/GATA3/NLRP3/HLA-DRB1/GPR183/ITGAM/HLA-DRA/LILRA5/IL1RL1/CD80/IL1B/SIRPB1/HLA-DMB/TSLP/CCR2/PTAFR/DPP4/IL1A/SHH	24
BP	GO:0002819	regulation of adaptive immune response	15/331	170/18862	3.35198e-07	3.58267e-05	2.74488e-05	SAMSN1/IL6/ALOX15/TNF/C3/GATA3/NLRP3/HLA-DRB1/HLA-DRA/FCGR2B/IL1RL1/CD80/IL1B/TNFRSF1B/CCR2	15
BP	GO:0002699	positive regulation of immune effector process	17/331	219/18862	3.48942e-07	3.62302e-05	2.77579e-05	IL6/TNF/IL13RA2/C3/CD74/GATA3/NLRP3/HLA-DRB1/ITGAM/HLA-DRA/CD80/IL1B/NOS2/KLK5/HLA-DMB/CCR2/PTAFR	17
BP	GO:0050863	regulation of T cell activation	21/331	327/18862	3.60617e-07	3.64023e-05	2.78898e-05	IL6/CCL2/HLA-DPA1/LILRB2/VNN1/CD74/GATA3/NLRP3/HLA-DRB1/HLA-DRA/FCGR2B/CD80/IL1B/SIRPB1/HLA-DMB/TNFRSF1B/VSIG4/CCR2/DPP4/IL1A/SHH	21
BP	GO:0001523	retinoid metabolic process	12/331	108/18862	4.31902e-07	4.24198e-05	3.25002e-05	ADH1C/AKR1C4/CYP1B1/CYP2C18/GPC6/RDH12/UGT1A7/ADH7/AKR1B10/GPC3/ALDH8A1/CYP26A1	12
BP	GO:0050920	regulation of chemotaxis	17/331	224/18862	4.80152e-07	4.59177e-05	3.51801e-05	DUSP1/IL6/CCL2/CCL7/VEGFC/C5AR2/CD74/GPR183/FPR2/CSF1R/SEMA3B/CXCL10/CCR2/CCR1/DPP4/SEMA6D/ARTN	17
BP	GO:0031424	keratinization	17/331	225/18862	5.11238e-07	4.74869e-05	3.63824e-05	KRT13/KRT33A/KRT7/SPRR1A/KRT40/SPRR2F/LCE1F/KRT24/SPRR3/KRT31/TGM3/KLK5/RPTN/KRT20/KRT81/KRT74/KRT77	17
BP	GO:0048839	inner ear development	15/331	176/18862	5.24583e-07	4.74869e-05	3.63824e-05	KCNK2/ROR1/GATA3/OTX1/MYCL/USH1G/BMP2/DLX6/DLX5/USH1C/CALB1/FREM2/SOX2/GABRA5/SHH	15
BP	GO:0009410	response to xenobiotic stimulus	13/331	131/18862	5.35763e-07	4.74869e-05	3.63824e-05	GSTM1/RORC/CYP1B1/CYP2C18/UGT1A10/AADAC/GSTA1/CYP2A6/ALDH3A1/CES1/UGT1A7/GSTM3/CYP26A1	13
BP	GO:0043583	ear development	16/331	202/18862	5.9073e-07	5.11122e-05	3.91599e-05	KCNK2/ROR1/GATA3/OTX1/MYCL/USH1G/BMP2/SIX2/DLX6/DLX5/USH1C/CALB1/FREM2/SOX2/GABRA5/SHH	16
BP	GO:0002696	positive regulation of leukocyte activation	23/331	401/18862	7.29366e-07	6.16399e-05	4.72258e-05	IL6/CCL2/HLA-DPA1/LILRB2/VNN1/CD74/GATA3/NLRP3/HLA-DRB1/GPR183/ITGAM/HLA-DRA/IL1RL1/CD80/IL1B/SIRPB1/HLA-DMB/TSLP/CCR2/PTAFR/DPP4/IL1A/SHH	23
BP	GO:0016101	diterpenoid metabolic process	12/331	114/18862	7.78711e-07	6.43144e-05	4.92749e-05	ADH1C/AKR1C4/CYP1B1/CYP2C18/GPC6/RDH12/UGT1A7/ADH7/AKR1B10/GPC3/ALDH8A1/CYP26A1	12
BP	GO:0072507	divalent inorganic cation homeostasis	26/331	499/18862	8.51066e-07	6.76186e-05	5.18064e-05	CYP27B1/CCL7/MT1A/SAA1/C5AR2/TGM2/CAMK2N1/ADORA1/CXCL11/NPSR1/FPR2/GPR65/FPR3/MT2A/SLC30A3/FPR1/CXCL10/ATP13A5/CCR2/CCR1/CCL8/P2RY1/CALB1/HAP1/SLC35G1/ADCY8	26
BP	GO:0033559	unsaturated fatty acid metabolic process	12/331	115/18862	8.55931e-07	6.76186e-05	5.18064e-05	GSTM1/ALOX15/AKR1C4/CD74/CYP1B1/CYP2C18/GSTA1/IL1B/CYP2A6/AKR1C2/CYP4F3/CYP4F11	12
BP	GO:0002237	response to molecule of bacterial origin	21/331	346/18862	9.06011e-07	7.0052e-05	5.36708e-05	CSF2/IL6/CYP27B1/CPS1/CCL2/TNF/LILRB2/PPBP/NLRP3/CSF3/CXCL5/FCGR2B/CXCL11/CD80/IL1B/NOS2/CXCL10/TNFRSF1B/AKAP12/PTAFR/IL1A	21
BP	GO:0032635	interleukin-6 production	14/331	162/18862	1.06509e-06	8.06365e-05	6.17802e-05	EREG/IL6/TNF/LILRB2/TLR8/C5AR2/CD74/LILRA5/IL1B/NOS2/TSLP/PTAFR/TLR7/IL1A	14
BP	GO:0042363	fat-soluble vitamin catabolic process	5/331	12/18862	1.15587e-06	8.57234e-05	6.56775e-05	CYP27B1/CYP24A1/CYP4F3/CYP26A1/CYP4F11	5
BP	GO:0006953	acute-phase response	8/331	46/18862	1.20656e-06	8.76928e-05	6.71864e-05	IL6/FN1/TNF/CD163/SAA1/SAA2/IL1B/IL1A	8
BP	GO:0032496	response to lipopolysaccharide	20/331	326/18862	1.40135e-06	9.98532e-05	7.65031e-05	CSF2/IL6/CYP27B1/CPS1/CCL2/TNF/LILRB2/PPBP/NLRP3/CSF3/CXCL5/CXCL11/CD80/IL1B/NOS2/CXCL10/TNFRSF1B/AKAP12/PTAFR/IL1A	20
BP	GO:0050731	positive regulation of peptidyl-tyrosine phosphorylation	15/331	193/18862	1.69077e-06	0.000115091	8.81779e-05	CSF2/EREG/IL6/OSM/TNF/ITGB3/CD74/CSF3/LILRA5/ADORA1/CD80/CSF1R/AREG/TSLP/NTRK2	15
BP	GO:0002673	regulation of acute inflammatory response	8/331	48/18862	1.69245e-06	0.000115091	8.81779e-05	IL6/OSM/TNF/C3/NLRP3/FCGR2B/ADORA1/IL1B	8
BP	GO:0009913	epidermal cell differentiation	21/331	360/18862	1.71022e-06	0.000115091	8.81779e-05	EREG/KRT13/CYP27B1/KRT33A/KRT7/SPRR1A/KRT40/SPRR2F/LCE1F/KRT24/SPRR3/KRT31/TGM3/MYCL/KLK5/RPTN/KRT20/KRT81/KRT74/USH1C/KRT77	21
BP	GO:0006690	icosanoid metabolic process	12/331	123/18862	1.76156e-06	0.000115427	8.84352e-05	GSTM1/ALOX15/AKR1C4/CD74/CYP1B1/CYP2C18/GSTA1/IL1B/CYP2A6/AKR1C2/CYP4F3/CYP4F11	12
BP	GO:0030216	keratinocyte differentiation	19/331	302/18862	1.77873e-06	0.000115427	8.84352e-05	EREG/KRT13/CYP27B1/KRT33A/KRT7/SPRR1A/KRT40/SPRR2F/LCE1F/KRT24/SPRR3/KRT31/TGM3/KLK5/RPTN/KRT20/KRT81/KRT74/KRT77	19
BP	GO:0006721	terpenoid metabolic process	12/331	124/18862	1.92003e-06	0.00011815	9.05214e-05	ADH1C/AKR1C4/CYP1B1/CYP2C18/GPC6/RDH12/UGT1A7/ADH7/AKR1B10/GPC3/ALDH8A1/CYP26A1	12
BP	GO:0071621	granulocyte chemotaxis	12/331	124/18862	1.92003e-06	0.00011815	9.05214e-05	CCL2/CCL7/PPBP/SAA1/C5AR2/CD74/CXCL5/CXCL11/CSF1R/CXCL10/CCL8/DPP4	12
BP	GO:0050670	regulation of lymphocyte proliferation	16/331	221/18862	1.94519e-06	0.00011815	9.05214e-05	IL6/HLA-DPA1/LILRB2/CD74/MNDA/HLA-DRB1/GPR183/FCGR2B/CD80/IL1B/HLA-DMB/TNFRSF1B/VSIG4/CCR2/IL1A/SHH	16
BP	GO:0030593	neutrophil chemotaxis	11/331	103/18862	1.95074e-06	0.00011815	9.05214e-05	CCL2/CCL7/PPBP/SAA1/C5AR2/CD74/CXCL5/CXCL11/CXCL10/CCL8/DPP4	11
BP	GO:0032102	negative regulation of response to external stimulus	22/331	394/18862	1.98577e-06	0.0001183	9.06361e-05	SIGLEC10/DUSP1/CCL2/TNF/FGA/SAA1/FGG/C5AR2/GATA3/NLRP3/HLA-DRB1/SMPDL3B/FCGR2B/ADORA1/FPR2/NT5E/SEMA3B/TNFRSF1B/RGMA/VSIG4/DPP4/SEMA6D	22
BP	GO:0045229	external encapsulating structure organization	22/331	396/18862	2.157e-06	0.000122329	9.37234e-05	IL6/FN1/TNF/C6orf15/FGA/ITGB6/FGG/ITGB3/ADAMTS16/MMP7/CYP1B1/ITGAM/ADAMTSL4/TGM3/MMP13/KLK5/BMP2/MIA/TNFRSF1B/NDNF/DPP4/FBN2	22
BP	GO:0060326	cell chemotaxis	19/331	306/18862	2.16022e-06	0.000122329	9.37234e-05	DUSP1/IL6/CCL2/CCL7/PPBP/VEGFC/SAA1/C5AR2/CD74/GPR183/CXCL5/CXCL11/FPR2/CSF1R/CXCL10/CCR2/CCR1/CCL8/DPP4	19
BP	GO:0034341	response to interferon-gamma	15/331	197/18862	2.18459e-06	0.000122329	9.37234e-05	HLA-DQA1/CYP27B1/HLA-DQB1/CCL2/CCL7/HLA-DPA1/CD74/HLA-DRB5/HLA-DRB1/HLA-DRA/MT2A/NOS2/GBP6/PTAFR/CCL8	15
BP	GO:0032944	regulation of mononuclear cell proliferation	16/331	223/18862	2.18806e-06	0.000122329	9.37234e-05	IL6/HLA-DPA1/LILRB2/CD74/MNDA/HLA-DRB1/GPR183/FCGR2B/CD80/IL1B/HLA-DMB/TNFRSF1B/VSIG4/CCR2/IL1A/SHH	16
BP	GO:0002548	monocyte chemotaxis	9/331	68/18862	2.80835e-06	0.000153954	0.000117953	DUSP1/IL6/CCL2/CCL7/FPR2/CXCL10/CCR2/CCR1/CCL8	9
BP	GO:0009111	vitamin catabolic process	5/331	14/18862	2.83845e-06	0.000153954	0.000117953	CYP27B1/CYP24A1/CYP4F3/CYP26A1/CYP4F11	5
BP	GO:0002822	regulation of adaptive immune response based on somatic recombination of immune receptors built from immunoglobulin superfamily domains	13/331	155/18862	3.61149e-06	0.000193002	0.00014787	IL6/TNF/C3/GATA3/NLRP3/HLA-DRB1/HLA-DRA/FCGR2B/IL1RL1/CD80/IL1B/TNFRSF1B/CCR2	13
BP	GO:1903131	mononuclear cell differentiation	22/331	411/18862	3.9377e-06	0.000205645	0.000157556	CSF2/IL6/RORC/LILRB2/VNN1/ITGB6/CD74/GATA3/NLRP3/HLA-DRB1/GPR183/HLA-DRA/FCGR2B/DHRS2/BATF2/CD80/CSF1R/IL1B/INHBA/CCR2/IL1A/SHH	22
BP	GO:0002687	positive regulation of leukocyte migration	12/331	133/18862	4.01783e-06	0.000205645	0.000157556	IL6/CCL7/TNF/VEGFC/CD74/FPR2/CSF1R/CXCL10/CCR2/CCR1/PTAFR/CCL8	12
BP	GO:0050729	positive regulation of inflammatory response	12/331	133/18862	4.01783e-06	0.000205645	0.000157556	IL6/FABP4/OSM/TNF/C3/TGM2/LILRA5/IL1RL1/IL1B/TSLP/CCR2/TLR7	12
BP	GO:0002286	T cell activation involved in immune response	11/331	111/18862	4.08642e-06	0.000206199	0.000157981	IL6/RORC/CD74/GATA3/NLRP3/HLA-DRB1/GPR183/HLA-DRA/FCGR2B/CD80/HLA-DMB	11
BP	GO:0050730	regulation of peptidyl-tyrosine phosphorylation	17/331	262/18862	4.14214e-06	0.000206199	0.000157981	CSF2/SAMSN1/EREG/IL6/OSM/TNF/ITGB3/CD74/CSF3/LILRA5/ADORA1/EPHA7/CD80/CSF1R/AREG/TSLP/NTRK2	17
BP	GO:0032675	regulation of interleukin-6 production	13/331	158/18862	4.46544e-06	0.000219289	0.00016801	EREG/IL6/TNF/LILRB2/TLR8/C5AR2/CD74/LILRA5/IL1B/TSLP/PTAFR/TLR7/IL1A	13
BP	GO:0002703	regulation of leukocyte mediated immunity	15/331	209/18862	4.53271e-06	0.000219625	0.000168267	IL6/TNF/IL13RA2/C3/GATA3/NLRP3/HLA-DRB1/ITGAM/HLA-DRA/FCGR2B/IL1B/NOS2/TNFRSF1B/CCR2/PTAFR	15
BP	GO:0072503	cellular divalent inorganic cation homeostasis	24/331	480/18862	4.60811e-06	0.00022034	0.000168815	CCL7/MT1A/SAA1/C5AR2/TGM2/ADORA1/CXCL11/NPSR1/FPR2/GPR65/FPR3/MT2A/SLC30A3/FPR1/CXCL10/ATP13A5/CCR2/CCR1/CCL8/P2RY1/CALB1/HAP1/SLC35G1/ADCY8	24
BP	GO:0055074	calcium ion homeostasis	23/331	454/18862	5.8961e-06	0.000278265	0.000213194	CYP27B1/CCL7/SAA1/C5AR2/TGM2/CAMK2N1/ADORA1/CXCL11/NPSR1/FPR2/GPR65/FPR3/FPR1/CXCL10/ATP13A5/CCR2/CCR1/CCL8/P2RY1/CALB1/HAP1/SLC35G1/ADCY8	23
BP	GO:0034116	positive regulation of heterotypic cell-cell adhesion	5/331	16/18862	6.01645e-06	0.000280305	0.000214757	ALOX15/TNF/FGA/FGG/IL1B	5
BP	GO:0031349	positive regulation of defense response	20/331	361/18862	6.5577e-06	0.000301654	0.000231114	EREG/IL6/FABP4/OSM/TNF/TLR8/C3/TASL/MNDA/TGM2/LILRA5/FCN1/FPR2/IL1RL1/IL1B/KLK5/TSLP/CCR2/TLR7/MUC21	20
BP	GO:0030198	extracellular matrix organization	21/331	393/18862	6.72332e-06	0.000305407	0.000233989	IL6/FN1/TNF/C6orf15/FGA/ITGB6/FGG/ITGB3/ADAMTS16/MMP7/CYP1B1/ITGAM/ADAMTSL4/MMP13/KLK5/BMP2/MIA/TNFRSF1B/NDNF/DPP4/FBN2	21
BP	GO:0043062	extracellular structure organization	21/331	394/18862	6.99004e-06	0.000313603	0.000240269	IL6/FN1/TNF/C6orf15/FGA/ITGB6/FGG/ITGB3/ADAMTS16/MMP7/CYP1B1/ITGAM/ADAMTSL4/MMP13/KLK5/BMP2/MIA/TNFRSF1B/NDNF/DPP4/FBN2	21
BP	GO:0072676	lymphocyte migration	11/331	118/18862	7.4096e-06	0.000328372	0.000251584	CCL2/CCL7/SAA1/GATA3/GPR183/CXCL11/GPR15/CXCL10/CCR2/CCL8/ARTN	11
BP	GO:0010575	positive regulation of vascular endothelial growth factor production	6/331	28/18862	7.58997e-06	0.000332313	0.000254603	IL6/CCBE1/C3/CYP1B1/IL1B/IL1A	6
BP	GO:1990868	response to chemokine	10/331	97/18862	7.87568e-06	0.000336708	0.000257971	DUSP1/CCL2/CCL7/PPBP/CXCL5/CXCL11/CXCL10/CCR2/CCR1/CCL8	10
BP	GO:1990869	cellular response to chemokine	10/331	97/18862	7.87568e-06	0.000336708	0.000257971	DUSP1/CCL2/CCL7/PPBP/CXCL5/CXCL11/CXCL10/CCR2/CCR1/CCL8	10
BP	GO:0120254	olefinic compound metabolic process	11/331	119/18862	8.03828e-06	0.000339664	0.000260236	ALOX15/AKR1C4/CYP1B1/CYP2C18/GSTA1/CYP2A6/BMP2/AKR1C2/CYP4F3/ALDH8A1/CYP4F11	11
BP	GO:0006720	isoprenoid metabolic process	12/331	143/18862	8.50954e-06	0.000355445	0.000272326	ADH1C/AKR1C4/CYP1B1/CYP2C18/GPC6/RDH12/UGT1A7/ADH7/AKR1B10/GPC3/ALDH8A1/CYP26A1	12
BP	GO:0002697	regulation of immune effector process	23/331	465/18862	8.70478e-06	0.000359468	0.000275409	IL6/TNF/IL13RA2/C3/C5AR2/CD74/GATA3/NLRP3/HLA-DRB1/ITGAM/HLA-DRA/FCGR2B/C1QA/CD80/IL1B/NOS2/KLK5/CFB/HLA-DMB/TNFRSF1B/VSIG4/CCR2/PTAFR	23
BP	GO:0002709	regulation of T cell mediated immunity	9/331	78/18862	8.91198e-06	0.000363889	0.000278796	IL6/GATA3/NLRP3/HLA-DRB1/HLA-DRA/FCGR2B/IL1B/TNFRSF1B/CCR2	9
BP	GO:0032722	positive regulation of chemokine production	8/331	60/18862	9.55838e-06	0.000385946	0.000295695	IL6/TNF/CD74/IL1RL1/CSF1R/IL1B/TSLP/TLR7	8
BP	GO:0002683	negative regulation of immune system process	21/331	403/18862	9.85828e-06	0.000393681	0.000301621	SAMSN1/DUSP1/CCL2/MILR1/ALOX15/TNF/LILRB2/IL13RA2/C5AR2/CD74/MNDA/HLA-DRB1/FCGR2B/ADORA1/IL1RL1/CD80/INHBA/VSIG4/CCR2/DPP4/SHH	21
BP	GO:0070661	leukocyte proliferation	18/331	312/18862	1.10248e-05	0.000431443	0.000330553	IL6/HLA-DPA1/LILRB2/CD74/MNDA/HLA-DRB1/GPR183/FCGR2B/CD80/CSF1R/IL1B/HLA-DMB/TNFRSF1B/VSIG4/CCR2/CCL8/IL1A/SHH	18
BP	GO:1990266	neutrophil migration	11/331	123/18862	1.10413e-05	0.000431443	0.000330553	CCL2/CCL7/PPBP/SAA1/C5AR2/CD74/CXCL5/CXCL11/CXCL10/CCL8/DPP4	11
BP	GO:0042110	T cell activation	23/331	474/18862	1.18526e-05	0.000456432	0.000349698	IL6/RORC/CCL2/HLA-DPA1/LILRB2/VNN1/CD74/GATA3/NLRP3/HLA-DRB1/GPR183/HLA-DRA/FCGR2B/CD80/IL1B/SIRPB1/HLA-DMB/TNFRSF1B/VSIG4/CCR2/DPP4/IL1A/SHH	23
BP	GO:0070665	positive regulation of leukocyte proliferation	12/331	148/18862	1.20852e-05	0.000456432	0.000349698	IL6/HLA-DPA1/LILRB2/CD74/GPR183/CD80/CSF1R/IL1B/HLA-DMB/CCR2/IL1A/SHH	12
BP	GO:0097530	granulocyte migration	12/331	148/18862	1.20852e-05	0.000456432	0.000349698	CCL2/CCL7/PPBP/SAA1/C5AR2/CD74/CXCL5/CXCL11/CSF1R/CXCL10/CCL8/DPP4	12
BP	GO:0010573	vascular endothelial growth factor production	8/331	62/18862	1.22524e-05	0.000456432	0.000349698	IL6/CCBE1/TNF/C3/CYP1B1/IL1B/CCR2/IL1A	8
BP	GO:0006775	fat-soluble vitamin metabolic process	7/331	45/18862	1.23088e-05	0.000456432	0.000349698	CYP27B1/SNAI1/TNF/CYP24A1/CYP4F3/CYP26A1/CYP4F11	7
BP	GO:0002705	positive regulation of leukocyte mediated immunity	11/331	125/18862	1.28786e-05	0.000472734	0.000362188	IL6/TNF/C3/GATA3/NLRP3/HLA-DRB1/ITGAM/HLA-DRA/IL1B/NOS2/PTAFR	11
BP	GO:0071346	cellular response to interferon-gamma	13/331	177/18862	1.53413e-05	0.000547458	0.000419438	HLA-DQA1/HLA-DQB1/CCL2/CCL7/HLA-DPA1/HLA-DRB5/HLA-DRB1/HLA-DRA/MT2A/NOS2/GBP6/PTAFR/CCL8	13
BP	GO:0032732	positive regulation of interleukin-1 production	8/331	64/18862	1.55589e-05	0.000547458	0.000419438	IL6/TNF/SAA1/TLR8/MNDA/NLRP3/LILRA5/NLRP2	8
BP	GO:0042093	T-helper cell differentiation	8/331	64/18862	1.55589e-05	0.000547458	0.000419438	IL6/RORC/GATA3/NLRP3/HLA-DRB1/GPR183/HLA-DRA/CD80	8
BP	GO:0048247	lymphocyte chemotaxis	8/331	64/18862	1.55589e-05	0.000547458	0.000419438	CCL2/CCL7/SAA1/GPR183/CXCL11/CXCL10/CCR2/CCL8	8
BP	GO:0002573	myeloid leukocyte differentiation	14/331	204/18862	1.56675e-05	0.000547458	0.000419438	CSF2/TNF/ITGB6/CD74/GATA3/HLA-DRB1/CSF3/GPR183/DHRS2/BATF2/CSF1R/INHBA/CCR1/GPC3	14
BP	GO:0001774	microglial cell activation	7/331	47/18862	1.65537e-05	0.000572917	0.000438943	IL6/TNF/TLR8/ITGAM/FPR2/C1QA/TLR7	7
BP	GO:0051251	positive regulation of lymphocyte activation	19/331	356/18862	1.88222e-05	0.000640266	0.000490543	IL6/CCL2/HLA-DPA1/LILRB2/VNN1/CD74/GATA3/NLRP3/HLA-DRB1/GPR183/HLA-DRA/CD80/IL1B/SIRPB1/HLA-DMB/CCR2/DPP4/IL1A/SHH	19
BP	GO:0032649	regulation of interferon-gamma production	10/331	107/18862	1.88521e-05	0.000640266	0.000490543	HLA-DPA1/TNF/TLR8/GATA3/HLA-DRB1/IL1RL1/IL1B/INHBA/CCR2/TLR7	10
BP	GO:0002294	CD4-positive, alpha-beta T cell differentiation involved in immune response	8/331	66/18862	1.95851e-05	0.000659003	0.000504899	IL6/RORC/GATA3/NLRP3/HLA-DRB1/GPR183/HLA-DRA/CD80	8
BP	GO:0002695	negative regulation of leukocyte activation	13/331	182/18862	2.06368e-05	0.000678465	0.00051981	SAMSN1/MILR1/LILRB2/IL13RA2/CD74/MNDA/HLA-DRB1/FCGR2B/CD80/INHBA/VSIG4/CCR2/SHH	13
BP	GO:0002724	regulation of T cell cytokine production	6/331	33/18862	2.07236e-05	0.000678465	0.00051981	IL6/GATA3/NLRP3/IL1B/TNFRSF1B/CCR2	6
BP	GO:0042573	retinoic acid metabolic process	6/331	33/18862	2.07236e-05	0.000678465	0.00051981	ADH1C/CYP2C18/UGT1A7/ADH7/ALDH8A1/CYP26A1	6
BP	GO:0002287	alpha-beta T cell activation involved in immune response	8/331	67/18862	2.19052e-05	0.000698277	0.000534989	IL6/RORC/GATA3/NLRP3/HLA-DRB1/GPR183/HLA-DRA/CD80	8
BP	GO:0002293	alpha-beta T cell differentiation involved in immune response	8/331	67/18862	2.19052e-05	0.000698277	0.000534989	IL6/RORC/GATA3/NLRP3/HLA-DRB1/GPR183/HLA-DRA/CD80	8
BP	GO:0072078	nephron tubule morphogenesis	8/331	67/18862	2.19052e-05	0.000698277	0.000534989	WNT6/ADAMTS16/GATA3/WNK4/BMP2/SIX2/GPC3/SHH	8
BP	GO:0009636	response to toxic substance	15/331	239/18862	2.25697e-05	0.000713201	0.000546423	GSTM1/CPS1/MT1A/SLC6A14/CYP1B1/DHRS2/MT2A/GSTA1/DDC/RDH12/SCN9A/GPX2/CES1/GSTM3/AKR1B10	15
BP	GO:0045582	positive regulation of T cell differentiation	9/331	88/18862	2.39488e-05	0.000731344	0.000560323	LILRB2/VNN1/CD74/GATA3/NLRP3/HLA-DRB1/HLA-DRA/CD80/SHH	9
BP	GO:0060993	kidney morphogenesis	9/331	88/18862	2.39488e-05	0.000731344	0.000560323	WNT6/ADAMTS16/GATA3/WNK4/BMP2/SIX2/CALB1/GPC3/SHH	9
BP	GO:0070098	chemokine-mediated signaling pathway	9/331	88/18862	2.39488e-05	0.000731344	0.000560323	CCL2/CCL7/PPBP/CXCL5/CXCL11/CXCL10/CCR2/CCR1/CCL8	9
BP	GO:0072080	nephron tubule development	9/331	88/18862	2.39488e-05	0.000731344	0.000560323	WNT6/ADAMTS16/GATA3/WNK4/BMP2/SIX2/CALB1/GPC3/SHH	9
BP	GO:0051048	negative regulation of secretion	12/331	160/18862	2.64553e-05	0.000799137	0.000612263	OSM/IL13RA2/CD74/FCGR2B/ADORA1/IL1B/WNK4/INHBA/TNFRSF1B/CCR2/P2RY1/ADRA2B	12
BP	GO:0050671	positive regulation of lymphocyte proliferation	11/331	135/18862	2.66086e-05	0.000799137	0.000612263	IL6/HLA-DPA1/LILRB2/CD74/GPR183/CD80/IL1B/HLA-DMB/CCR2/IL1A/SHH	11
BP	GO:0072088	nephron epithelium morphogenesis	8/331	69/18862	2.72411e-05	0.000811428	0.000621681	WNT6/ADAMTS16/GATA3/WNK4/BMP2/SIX2/GPC3/SHH	8
BP	GO:0032609	interferon-gamma production	10/331	112/18862	2.81074e-05	0.000828012	0.000634386	HLA-DPA1/TNF/TLR8/GATA3/HLA-DRB1/IL1RL1/IL1B/INHBA/CCR2/TLR7	10
BP	GO:0032946	positive regulation of mononuclear cell proliferation	11/331	136/18862	2.85041e-05	0.000828012	0.000634386	IL6/HLA-DPA1/LILRB2/CD74/GPR183/CD80/IL1B/HLA-DMB/CCR2/IL1A/SHH	11
BP	GO:0002460	adaptive immune response based on somatic recombination of immune receptors built from immunoglobulin superfamily domains	19/331	367/18862	2.86149e-05	0.000828012	0.000634386	IL6/HLA-DQB1/RORC/TNF/IL13RA2/TLR8/C3/CD74/GATA3/NLRP3/HLA-DRB1/HLA-DRA/FCGR2B/IL1RL1/C1QA/CD80/IL1B/TNFRSF1B/CCR2	19
BP	GO:0061326	renal tubule development	9/331	90/18862	2.87093e-05	0.000828012	0.000634386	WNT6/ADAMTS16/GATA3/WNK4/BMP2/SIX2/CALB1/GPC3/SHH	9
BP	GO:0018149	peptide cross-linking	6/331	35/18862	2.94869e-05	0.000843742	0.000646438	FN1/SPRR1A/TGM2/SPRR3/TGM3/NDNF	6
BP	GO:0002690	positive regulation of leukocyte chemotaxis	9/331	91/18862	3.13756e-05	0.000889581	0.000681558	IL6/CCL7/VEGFC/CD74/FPR2/CSF1R/CXCL10/CCR2/CCR1	9
BP	GO:0030217	T cell differentiation	15/331	246/18862	3.15784e-05	0.000889581	0.000681558	IL6/RORC/LILRB2/VNN1/CD74/GATA3/NLRP3/HLA-DRB1/GPR183/HLA-DRA/CD80/IL1B/CCR2/IL1A/SHH	15
BP	GO:0002922	positive regulation of humoral immune response	5/331	22/18862	3.32626e-05	0.00092569	0.000709223	TNF/C3/FCGR2B/IL1B/KLK5	5
BP	GO:0061333	renal tubule morphogenesis	8/331	71/18862	3.36244e-05	0.00092569	0.000709223	WNT6/ADAMTS16/GATA3/WNK4/BMP2/SIX2/GPC3/SHH	8
BP	GO:0072028	nephron morphogenesis	8/331	71/18862	3.36244e-05	0.00092569	0.000709223	WNT6/ADAMTS16/GATA3/WNK4/BMP2/SIX2/GPC3/SHH	8
BP	GO:0002369	T cell cytokine production	6/331	36/18862	3.48657e-05	0.000952647	0.000729876	IL6/GATA3/NLRP3/IL1B/TNFRSF1B/CCR2	6
BP	GO:0001704	formation of primary germ layer	10/331	115/18862	3.53449e-05	0.000958534	0.000734386	DUSP5/DUSP1/FN1/SNAI1/ITGB3/DUSP4/SIX2/INHBA/MSGN1/SOX2	10
BP	GO:0046718	viral entry into host cell	11/331	140/18862	3.72998e-05	0.00100406	0.000769264	ITGB6/ITGB3/CD74/HLA-DRB1/FCN1/GPR15/CD80/SIGLEC1/SELPLG/CLDN6/DPP4	11
BP	GO:0006874	cellular calcium ion homeostasis	21/331	442/18862	3.87462e-05	0.00103532	0.000793218	CCL7/SAA1/C5AR2/TGM2/ADORA1/CXCL11/NPSR1/FPR2/GPR65/FPR3/FPR1/CXCL10/ATP13A5/CCR2/CCR1/CCL8/P2RY1/CALB1/HAP1/SLC35G1/ADCY8	21
BP	GO:0051480	regulation of cytosolic calcium ion concentration	18/331	344/18862	4.03947e-05	0.00107091	0.000820482	SAA1/C5AR2/TGM2/ADORA1/CXCL11/NPSR1/FPR2/GPR65/FPR3/FPR1/CXCL10/CCR2/CCR1/P2RY1/CALB1/HAP1/SLC35G1/ADCY8	18
BP	GO:0034308	primary alcohol metabolic process	9/331	94/18862	4.06674e-05	0.00107091	0.000820482	ADH1C/AKR1C4/ALDH3B1/CYP1B1/BMP2/RDH12/AKR1C2/ADH7/AKR1B10	9
BP	GO:0002292	T cell differentiation involved in immune response	8/331	73/18862	4.12123e-05	0.00107659	0.000824836	IL6/RORC/GATA3/NLRP3/HLA-DRB1/GPR183/HLA-DRA/CD80	8
BP	GO:0046651	lymphocyte proliferation	16/331	282/18862	4.14757e-05	0.00107659	0.000824836	IL6/HLA-DPA1/LILRB2/CD74/MNDA/HLA-DRB1/GPR183/FCGR2B/CD80/IL1B/HLA-DMB/TNFRSF1B/VSIG4/CCR2/IL1A/SHH	16
BP	GO:0042129	regulation of T cell proliferation	12/331	168/18862	4.28114e-05	0.00110338	0.000845362	IL6/HLA-DPA1/LILRB2/HLA-DRB1/CD80/IL1B/HLA-DMB/TNFRSF1B/VSIG4/CCR2/IL1A/SHH	12
BP	GO:0042063	gliogenesis	16/331	283/18862	4.32735e-05	0.00110744	0.000848469	IL6/CCL2/TNF/ROR1/GPR183/FPR2/C1QA/CSF1R/IL1B/BMP2/TNFRSF1B/CCR2/P2RY1/SOX2/NTRK2/SHH	16
BP	GO:0032943	mononuclear cell proliferation	16/331	285/18862	4.70768e-05	0.00119634	0.000916585	IL6/HLA-DPA1/LILRB2/CD74/MNDA/HLA-DRB1/GPR183/FCGR2B/CD80/IL1B/HLA-DMB/TNFRSF1B/VSIG4/CCR2/IL1A/SHH	16
BP	GO:0001676	long-chain fatty acid metabolic process	10/331	120/18862	5.09497e-05	0.00128577	0.000985102	GSTM1/ALOX15/CYP1B1/ACSL5/CYP2C18/GSTA1/CYP2A6/GLYATL2/CYP4F3/CYP4F11	10
BP	GO:0019748	secondary metabolic process	7/331	56/18862	5.33304e-05	0.00132741	0.00101701	AKR1C4/CYP1B1/DDC/CYP2A6/UGT1A7/AKR1C2/AKR1B10	7
BP	GO:0032731	positive regulation of interleukin-1 beta production	7/331	56/18862	5.33304e-05	0.00132741	0.00101701	IL6/TNF/TLR8/MNDA/NLRP3/LILRA5/NLRP2	7
BP	GO:0002700	regulation of production of molecular mediator of immune response	11/331	146/18862	5.48433e-05	0.00135579	0.00103874	IL6/TNF/IL13RA2/CD74/GATA3/NLRP3/FCGR2B/IL1B/KLK5/TNFRSF1B/CCR2	11
BP	GO:0050866	negative regulation of cell activation	13/331	200/18862	5.52442e-05	0.00135647	0.00103927	SAMSN1/MILR1/LILRB2/IL13RA2/CD74/MNDA/HLA-DRB1/FCGR2B/CD80/INHBA/VSIG4/CCR2/SHH	13
BP	GO:0002430	complement receptor mediated signaling pathway	4/331	13/18862	5.87522e-05	0.00143292	0.00109784	C5AR2/FPR2/FPR3/FPR1	4
BP	GO:0046883	regulation of hormone secretion	15/331	260/18862	5.95246e-05	0.00143726	0.00110116	IL6/OSM/TNF/FGA/FGG/HLA-DRB1/CAMK2N1/ADORA1/IL1B/NOS2/INHBA/P2RY1/DPP4/POMC/ADCY8	15
BP	GO:0032757	positive regulation of interleukin-8 production	7/331	57/18862	5.9892e-05	0.00143726	0.00110116	IL6/TNF/TLR8/CD74/FCN1/IL1B/TLR7	7
BP	GO:1901616	organic hydroxy compound catabolic process	8/331	77/18862	6.07131e-05	0.00143726	0.00110116	CYP27B1/MOXD1/ALDH3B1/CYP24A1/ADH7/CYP4F3/AKR1B10/CYP4F11	8
BP	GO:0002824	positive regulation of adaptive immune response based on somatic recombination of immune receptors built from immunoglobulin superfamily domains	9/331	99/18862	6.1303e-05	0.00143726	0.00110116	IL6/TNF/C3/GATA3/NLRP3/HLA-DRB1/HLA-DRA/IL1B/CCR2	9
BP	GO:0019886	antigen processing and presentation of exogenous peptide antigen via MHC class II	9/331	99/18862	6.1303e-05	0.00143726	0.00110116	HLA-DQA1/HLA-DQB1/HLA-DPA1/CD74/HLA-DRB5/HLA-DRB1/HLA-DRA/FCGR2B/HLA-DMB	9
BP	GO:0042102	positive regulation of T cell proliferation	9/331	99/18862	6.1303e-05	0.00143726	0.00110116	IL6/HLA-DPA1/LILRB2/CD80/IL1B/HLA-DMB/CCR2/IL1A/SHH	9
BP	GO:0045745	positive regulation of G protein-coupled receptor signaling pathway	5/331	25/18862	6.42694e-05	0.00149715	0.00114705	C3/NECAB2/KLK6/KLK5/MRAP2	5
BP	GO:0010574	regulation of vascular endothelial growth factor production	7/331	58/18862	6.70993e-05	0.00154328	0.0011824	IL6/CCBE1/C3/CYP1B1/IL1B/CCR2/IL1A	7
BP	GO:0060675	ureteric bud morphogenesis	7/331	58/18862	6.70993e-05	0.00154328	0.0011824	WNT6/ADAMTS16/GATA3/BMP2/SIX2/GPC3/SHH	7
BP	GO:0006631	fatty acid metabolic process	19/331	392/18862	6.94766e-05	0.00158791	0.00121659	GSTM1/ALOX15/AKR1C4/C3/CD74/CYP1B1/ACSL5/CYP2C18/CYP24A1/GSTA1/IL1B/CYP2A6/FADS6/CES1/AKR1C2/GLYATL2/ADH7/CYP4F3/CYP4F11	19
BP	GO:0045621	positive regulation of lymphocyte differentiation	9/331	101/18862	7.17261e-05	0.00162908	0.00124813	LILRB2/VNN1/CD74/GATA3/NLRP3/HLA-DRB1/HLA-DRA/CD80/SHH	9
BP	GO:0072171	mesonephric tubule morphogenesis	7/331	59/18862	7.49996e-05	0.00169285	0.00129699	WNT6/ADAMTS16/GATA3/BMP2/SIX2/GPC3/SHH	7
BP	GO:0034114	regulation of heterotypic cell-cell adhesion	5/331	26/18862	7.84342e-05	0.00175944	0.00134801	ALOX15/TNF/FGA/FGG/IL1B	5
BP	GO:0007369	gastrulation	12/331	179/18862	7.91818e-05	0.00176532	0.00135251	DUSP5/DUSP1/FN1/SNAI1/ITGB3/DUSP4/OTX2/SIX2/INHBA/MSGN1/SOX2/GPC3	12
BP	GO:0002495	antigen processing and presentation of peptide antigen via MHC class II	9/331	103/18862	8.36009e-05	0.00182488	0.00139814	HLA-DQA1/HLA-DQB1/HLA-DPA1/CD74/HLA-DRB5/HLA-DRB1/HLA-DRA/FCGR2B/HLA-DMB	9
BP	GO:0032637	interleukin-8 production	9/331	103/18862	8.36009e-05	0.00182488	0.00139814	IL6/TNF/TLR8/C5AR2/CD74/FCN1/IL1B/NOS2/TLR7	9
BP	GO:0034113	heterotypic cell-cell adhesion	7/331	60/18862	8.36428e-05	0.00182488	0.00139814	ALOX15/TNF/LILRB2/FGA/FGG/ITGB3/IL1B	7
BP	GO:0044409	entry into host	11/331	153/18862	8.3862e-05	0.00182488	0.00139814	ITGB6/ITGB3/CD74/HLA-DRB1/FCN1/GPR15/CD80/SIGLEC1/SELPLG/CLDN6/DPP4	11
BP	GO:0043367	CD4-positive, alpha-beta T cell differentiation	8/331	81/18862	8.73419e-05	0.00188929	0.00144749	IL6/RORC/GATA3/NLRP3/HLA-DRB1/GPR183/HLA-DRA/CD80	8
BP	GO:1902107	positive regulation of leukocyte differentiation	11/331	154/18862	8.89239e-05	0.00189328	0.00145055	TNF/LILRB2/VNN1/CD74/GATA3/NLRP3/HLA-DRB1/HLA-DRA/CD80/CCR1/SHH	11
BP	GO:1903708	positive regulation of hemopoiesis	11/331	154/18862	8.89239e-05	0.00189328	0.00145055	TNF/LILRB2/VNN1/CD74/GATA3/NLRP3/HLA-DRB1/HLA-DRA/CD80/CCR1/SHH	11
BP	GO:0002456	T cell mediated immunity	9/331	104/18862	9.01313e-05	0.00189328	0.00145055	IL6/GATA3/NLRP3/HLA-DRB1/HLA-DRA/FCGR2B/IL1B/TNFRSF1B/CCR2	9
BP	GO:0002504	antigen processing and presentation of peptide or polysaccharide antigen via MHC class II	9/331	104/18862	9.01313e-05	0.00189328	0.00145055	HLA-DQA1/HLA-DQB1/HLA-DPA1/CD74/HLA-DRB5/HLA-DRB1/HLA-DRA/FCGR2B/HLA-DMB	9
BP	GO:0002821	positive regulation of adaptive immune response	9/331	104/18862	9.01313e-05	0.00189328	0.00145055	IL6/TNF/C3/GATA3/NLRP3/HLA-DRB1/HLA-DRA/IL1B/CCR2	9
BP	GO:0046879	hormone secretion	16/331	302/18862	9.327e-05	0.00193682	0.0014839	IL6/OSM/TNF/FGA/FGG/GATA3/HLA-DRB1/CAMK2N1/ADORA1/IL1B/NOS2/INHBA/P2RY1/DPP4/POMC/ADCY8	16
BP	GO:1901214	regulation of neuron death	16/331	302/18862	9.327e-05	0.00193682	0.0014839	CCL2/AGAP2/TNF/GATA3/CSF3/ITGAM/FCGR2B/ADORA1/VSTM2L/EPHA7/SNCG/C1QA/TNFRSF1B/NDNF/GABRA5/NTRK2	16
BP	GO:0002675	positive regulation of acute inflammatory response	5/331	27/18862	9.48845e-05	0.00194808	0.00149253	IL6/OSM/TNF/C3/IL1B	5
BP	GO:0090025	regulation of monocyte chemotaxis	5/331	27/18862	9.48845e-05	0.00194808	0.00149253	DUSP1/FPR2/CXCL10/CCR2/CCR1	5
BP	GO:2000273	positive regulation of signaling receptor activity	6/331	43/18862	9.84259e-05	0.00200944	0.00153954	EREG/CCL2/ADORA1/AREG/CCR2/ADRA2B	6
BP	GO:0018108	peptidyl-tyrosine phosphorylation	18/331	369/18862	9.92322e-05	0.00201458	0.00154348	CSF2/SAMSN1/EREG/IL6/OSM/TNF/ROR1/ITGB3/CD74/CSF3/LILRA5/ADORA1/EPHA7/CD80/CSF1R/AREG/TSLP/NTRK2	18
BP	GO:0072009	nephron epithelium development	9/331	106/18862	0.000104482	0.00210938	0.00161611	WNT6/ADAMTS16/GATA3/WNK4/BMP2/SIX2/CALB1/GPC3/SHH	9
BP	GO:0002706	regulation of lymphocyte mediated immunity	11/331	157/18862	0.000105707	0.00212231	0.00162602	IL6/TNF/C3/GATA3/NLRP3/HLA-DRB1/HLA-DRA/FCGR2B/IL1B/TNFRSF1B/CCR2	11
BP	GO:0072073	kidney epithelium development	10/331	131/18862	0.000106859	0.00213365	0.00163471	WNT6/ADAMTS16/GATA3/EPHA7/WNK4/BMP2/SIX2/CALB1/GPC3/SHH	10
BP	GO:0002468	dendritic cell antigen processing and presentation	4/331	15/18862	0.000109089	0.00215451	0.00165069	CD74/HLA-DRB1/HLA-DRA/FCGR2B	4
BP	GO:0042481	regulation of odontogenesis	4/331	15/18862	0.000109089	0.00215451	0.00165069	SP6/BMP2/DMRT3/SHH	4
BP	GO:0018212	peptidyl-tyrosine modification	18/331	372/18862	0.000109866	0.00215813	0.00165346	CSF2/SAMSN1/EREG/IL6/OSM/TNF/ROR1/ITGB3/CD74/CSF3/LILRA5/ADORA1/EPHA7/CD80/CSF1R/AREG/TSLP/NTRK2	18
BP	GO:0046632	alpha-beta T cell differentiation	9/331	107/18862	0.000112346	0.00219498	0.00168169	IL6/RORC/GATA3/NLRP3/HLA-DRB1/GPR183/HLA-DRA/CD80/SHH	9
BP	GO:0002718	regulation of cytokine production involved in immune response	8/331	84/18862	0.000113121	0.00219829	0.00168423	IL6/TNF/CD74/GATA3/NLRP3/IL1B/TNFRSF1B/CCR2	8
BP	GO:0016042	lipid catabolic process	17/331	340/18862	0.000114776	0.0022186	0.0016998	CYP27B1/CPS1/FABP4/TNF/CYP1B1/SMPDL3B/ADORA1/PLAAT1/AADAC/CYP24A1/IL1B/CES1/GLYATL2/CYP4F3/AKR1B10/CYP26A1/CYP4F11	17
BP	GO:0002791	regulation of peptide secretion	16/331	308/18862	0.000117189	0.00225325	0.00172634	IL6/TNF/FGA/VEGFC/SAA1/FGG/CD74/HLA-DRB1/CAMK2N1/ADORA1/IL1B/NOS2/KRT20/DPP4/IL1A/ADCY8	16
BP	GO:0050728	negative regulation of inflammatory response	11/331	160/18862	0.00012512	0.00239309	0.00183348	SIGLEC10/SAA1/GATA3/NLRP3/HLA-DRB1/SMPDL3B/FCGR2B/ADORA1/FPR2/NT5E/TNFRSF1B	11
BP	GO:0001657	ureteric bud development	8/331	86/18862	0.000133572	0.00254137	0.00194709	WNT6/ADAMTS16/GATA3/BMP2/SIX2/CALB1/GPC3/SHH	8
BP	GO:0009914	hormone transport	16/331	312/18862	0.00013597	0.00257351	0.00197171	IL6/OSM/TNF/FGA/FGG/GATA3/HLA-DRB1/CAMK2N1/ADORA1/IL1B/NOS2/INHBA/P2RY1/DPP4/POMC/ADCY8	16
BP	GO:0002830	positive regulation of type 2 immune response	4/331	16/18862	0.000143447	0.00270011	0.00206871	IL6/CD74/GATA3/NLRP3	4
BP	GO:0072163	mesonephric epithelium development	8/331	87/18862	0.000144888	0.00270011	0.00206871	WNT6/ADAMTS16/GATA3/BMP2/SIX2/CALB1/GPC3/SHH	8
BP	GO:0072164	mesonephric tubule development	8/331	87/18862	0.000144888	0.00270011	0.00206871	WNT6/ADAMTS16/GATA3/BMP2/SIX2/CALB1/GPC3/SHH	8
BP	GO:0071675	regulation of mononuclear cell migration	9/331	111/18862	0.00014894	0.00276146	0.00211571	DUSP1/CCL2/CCL7/TNF/FPR2/CSF1R/CXCL10/CCR2/CCR1	9
BP	GO:0070664	negative regulation of leukocyte proliferation	8/331	88/18862	0.000156982	0.00289579	0.00221863	LILRB2/MNDA/HLA-DRB1/FCGR2B/CD80/VSIG4/CCL8/SHH	8
BP	GO:0002828	regulation of type 2 immune response	5/331	30/18862	0.000160419	0.00294426	0.00225576	IL6/CD74/GATA3/NLRP3/CCR2	5
BP	GO:0097028	dendritic cell differentiation	6/331	47/18862	0.000163443	0.00298469	0.00228674	CSF2/LILRB2/ITGB6/FCGR2B/DHRS2/BATF2	6
BP	GO:0050766	positive regulation of phagocytosis	7/331	67/18862	0.000169611	0.00307163	0.00235335	CCL2/TNF/C3/FCGR2B/FPR2/IL1B/SIRPB1	7
BP	GO:0032642	regulation of chemokine production	8/331	89/18862	0.000169895	0.00307163	0.00235335	IL6/TNF/CD74/IL1RL1/CSF1R/IL1B/TSLP/TLR7	8
BP	GO:0050921	positive regulation of chemotaxis	10/331	139/18862	0.000174488	0.00312359	0.00239315	IL6/CCL7/VEGFC/CD74/FPR2/CSF1R/CXCL10/CCR2/CCR1/ARTN	10
BP	GO:1903531	negative regulation of secretion by cell	10/331	139/18862	0.000174488	0.00312359	0.00239315	OSM/IL13RA2/FCGR2B/ADORA1/IL1B/INHBA/TNFRSF1B/CCR2/P2RY1/ADRA2B	10
BP	GO:0042098	T cell proliferation	12/331	195/18862	0.000177982	0.00317052	0.00242911	IL6/HLA-DPA1/LILRB2/HLA-DRB1/CD80/IL1B/HLA-DMB/TNFRSF1B/VSIG4/CCR2/IL1A/SHH	12
BP	GO:0006692	prostanoid metabolic process	6/331	48/18862	0.000184065	0.00324705	0.00248775	GSTM1/AKR1C4/CD74/GSTA1/IL1B/AKR1C2	6
BP	GO:0006693	prostaglandin metabolic process	6/331	48/18862	0.000184065	0.00324705	0.00248775	GSTM1/AKR1C4/CD74/GSTA1/IL1B/AKR1C2	6
BP	GO:0017157	regulation of exocytosis	12/331	197/18862	0.000195706	0.00343572	0.0026323	CPLX2/IL13RA2/FGA/FGG/ITGAM/FCGR2B/SYT12/CCR2/PTAFR/P2RY1/HAP1/RAB3B	12
BP	GO:0001823	mesonephros development	8/331	91/18862	0.000198348	0.00344878	0.00264231	WNT6/ADAMTS16/GATA3/BMP2/SIX2/CALB1/GPC3/SHH	8
BP	GO:0060333	interferon-gamma-mediated signaling pathway	8/331	91/18862	0.000198348	0.00344878	0.00264231	HLA-DQA1/HLA-DQB1/HLA-DPA1/HLA-DRB5/HLA-DRB1/HLA-DRA/MT2A/PTAFR	8
BP	GO:0002446	neutrophil mediated immunity	21/331	499/18862	0.00021201	0.00365236	0.00279828	IL6/CYBB/RNASE2/LILRB2/VNN1/PPBP/ALDH3B1/C3/MNDA/CDA/GPR84/ITGAM/FCN1/FCGR2A/FPR2/OLR1/SIRPB1/FPR1/LYZ/TNFRSF1B/PTAFR	21
BP	GO:0030098	lymphocyte differentiation	17/331	358/18862	0.000212066	0.00365236	0.00279828	IL6/RORC/LILRB2/VNN1/CD74/GATA3/NLRP3/HLA-DRB1/GPR183/HLA-DRA/FCGR2B/CD80/IL1B/INHBA/CCR2/IL1A/SHH	17
BP	GO:0042119	neutrophil activation	21/331	500/18862	0.000217826	0.00373387	0.00286073	CYBB/RNASE2/LILRB2/VNN1/PPBP/ALDH3B1/C3/MNDA/CDA/GPR84/ITGAM/FCGR2B/FCN1/FCGR2A/FPR2/OLR1/SIRPB1/FPR1/LYZ/TNFRSF1B/PTAFR	21
BP	GO:0002367	cytokine production involved in immune response	8/331	93/18862	0.000230601	0.00393429	0.00301428	IL6/TNF/CD74/GATA3/NLRP3/IL1B/TNFRSF1B/CCR2	8
BP	GO:0050806	positive regulation of synaptic transmission	10/331	144/18862	0.000232783	0.00395295	0.00302858	CCL2/TNF/LILRB2/ADORA1/SYT12/CCR2/CALB1/HAP1/ADCY8/NTRK2	10
BP	GO:0035743	CD4-positive, alpha-beta T cell cytokine production	4/331	18/18862	0.00023458	0.00396495	0.00303777	IL6/GATA3/NLRP3/IL1B	4
BP	GO:0051047	positive regulation of secretion	15/331	295/18862	0.000239988	0.00403758	0.00309342	FGA/VEGFC/FGG/HLA-DRB1/ITGAM/CAMK2N1/ADORA1/IL1B/BMP2/INHBA/AQP1/PTAFR/P2RY1/IL1A/ADCY8	15
BP	GO:0021536	diencephalon development	7/331	71/18862	0.000244322	0.00409156	0.00313477	OTX1/PITX1/BMP2/NDNF/HAP1/SOX2/SHH	7
BP	GO:0050764	regulation of phagocytosis	8/331	94/18862	0.000248269	0.00413858	0.00317079	CCL2/ALOX15/TNF/C3/FCGR2B/FPR2/IL1B/SIRPB1	8
BP	GO:0032652	regulation of interleukin-1 production	9/331	119/18862	0.000252307	0.00418668	0.00320765	IL6/TNF/SAA1/TLR8/MNDA/NLRP3/LILRA5/NLRP2/CARD18	9
BP	GO:0043277	apoptotic cell clearance	6/331	51/18862	0.000258478	0.00426958	0.00327116	CCL2/ALOX15/C3/ITGB3/TGM2/FCN1	6
BP	GO:0045580	regulation of T cell differentiation	10/331	146/18862	0.000260282	0.00427993	0.00327909	LILRB2/VNN1/CD74/GATA3/NLRP3/HLA-DRB1/HLA-DRA/CD80/CCR2/SHH	10
BP	GO:0048708	astrocyte differentiation	7/331	72/18862	0.000266622	0.00435151	0.00333394	IL6/TNF/ROR1/FPR2/C1QA/BMP2/SHH	7
BP	GO:0032602	chemokine production	8/331	95/18862	0.00026703	0.00435151	0.00333394	IL6/TNF/CD74/IL1RL1/CSF1R/IL1B/TSLP/TLR7	8
BP	GO:0045619	regulation of lymphocyte differentiation	11/331	175/18862	0.000274141	0.00442768	0.00339229	LILRB2/VNN1/CD74/GATA3/NLRP3/HLA-DRB1/HLA-DRA/CD80/INHBA/CCR2/SHH	11
BP	GO:0052126	movement in host environment	11/331	175/18862	0.000274141	0.00442768	0.00339229	ITGB6/ITGB3/CD74/HLA-DRB1/FCN1/GPR15/CD80/SIGLEC1/SELPLG/CLDN6/DPP4	11
BP	GO:0002790	peptide secretion	18/331	401/18862	0.000276773	0.00445042	0.00340971	IL6/TNF/FGA/VEGFC/SAA1/FGG/CD74/HLA-DRB1/CAMK2N1/ADORA1/SNCG/IL1B/NOS2/KRT20/DPP4/IL1A/ADCY8/RAB3B	18
BP	GO:2000027	regulation of animal organ morphogenesis	11/331	176/18862	0.000287931	0.00454931	0.00348548	SP6/TNF/ROR1/RSPO3/GATA3/GPC6/BMP2/SIX2/GPC3/DMRT3/SHH	11
BP	GO:0001658	branching involved in ureteric bud morphogenesis	6/331	52/18862	0.000287931	0.00454931	0.00348548	WNT6/ADAMTS16/BMP2/SIX2/GPC3/SHH	6
BP	GO:0002711	positive regulation of T cell mediated immunity	6/331	52/18862	0.000287931	0.00454931	0.00348548	IL6/GATA3/NLRP3/HLA-DRB1/HLA-DRA/IL1B	6
BP	GO:0002886	regulation of myeloid leukocyte mediated immunity	6/331	52/18862	0.000287931	0.00454931	0.00348548	IL13RA2/C3/ITGAM/FCGR2B/CCR2/PTAFR	6
BP	GO:0002689	negative regulation of leukocyte chemotaxis	4/331	19/18862	0.000293045	0.00461007	0.00353203	DUSP1/CCL2/C5AR2/DPP4	4
BP	GO:1901661	quinone metabolic process	5/331	34/18862	0.000295747	0.00463236	0.00354911	AKR1C4/AKR1C2/CYP4F3/AKR1B10/CYP4F11	5
BP	GO:0023061	signal release	20/331	475/18862	0.000297012	0.00463236	0.00354911	CPLX2/IL6/OSM/TNF/FGA/FGG/GATA3/HLA-DRB1/CAMK2N1/ADORA1/SYT12/SNCG/IL1B/NOS2/INHBA/P2RY1/DPP4/POMC/ADCY8/ADRA2B	20
BP	GO:0046631	alpha-beta T cell activation	10/331	149/18862	0.000306598	0.00476144	0.003648	IL6/RORC/GATA3/NLRP3/HLA-DRB1/GPR183/HLA-DRA/CD80/CCR2/SHH	10
BP	GO:0032677	regulation of interleukin-8 production	8/331	97/18862	0.000308036	0.00476342	0.00364952	IL6/TNF/TLR8/C5AR2/CD74/FCN1/IL1B/TLR7	8
BP	GO:0001706	endoderm formation	6/331	53/18862	0.000319955	0.00492677	0.00377467	DUSP5/DUSP1/FN1/DUSP4/INHBA/SOX2	6
BP	GO:0042476	odontogenesis	9/331	123/18862	0.000322947	0.00495186	0.0037939	SP6/WNT6/ITGB6/KLK5/BMP2/INHBA/AQP1/DMRT3/SHH	9
BP	GO:0002726	positive regulation of T cell cytokine production	4/331	20/18862	0.000361267	0.00544749	0.00417363	IL6/GATA3/NLRP3/IL1B	4
BP	GO:0043011	myeloid dendritic cell differentiation	4/331	20/18862	0.000361267	0.00544749	0.00417363	CSF2/ITGB6/DHRS2/BATF2	4
BP	GO:0090026	positive regulation of monocyte chemotaxis	4/331	20/18862	0.000361267	0.00544749	0.00417363	FPR2/CXCL10/CCR2/CCR1	4
BP	GO:1902644	tertiary alcohol metabolic process	4/331	20/18862	0.000361267	0.00544749	0.00417363	AKR1C4/BMP2/AKR1C2/AKR1B10	4
BP	GO:0071692	protein localization to extracellular region	17/331	375/18862	0.000363386	0.00545679	0.00418075	IL6/TNF/FGA/VEGFC/SAA1/FGG/HLA-DRB1/CAMK2N1/SNCG/IL1B/NOS2/KRT20/DPP4/IL1A/ADCY8/RAB3B/FBN2	17
BP	GO:0051250	negative regulation of lymphocyte activation	10/331	153/18862	0.00037889	0.00564551	0.00432534	SAMSN1/LILRB2/CD74/MNDA/HLA-DRB1/FCGR2B/CD80/INHBA/VSIG4/SHH	10
BP	GO:0035710	CD4-positive, alpha-beta T cell activation	8/331	100/18862	0.00037906	0.00564551	0.00432534	IL6/RORC/GATA3/NLRP3/HLA-DRB1/GPR183/HLA-DRA/CD80	8
BP	GO:0070997	neuron death	16/331	342/18862	0.000381561	0.00565956	0.00433611	CCL2/AGAP2/TNF/GATA3/CSF3/ITGAM/FCGR2B/ADORA1/VSTM2L/EPHA7/SNCG/C1QA/TNFRSF1B/NDNF/GABRA5/NTRK2	16
BP	GO:0032612	interleukin-1 production	9/331	126/18862	0.000386034	0.00570263	0.0043691	IL6/TNF/SAA1/TLR8/MNDA/NLRP3/LILRA5/NLRP2/CARD18	9
BP	GO:0043312	neutrophil degranulation	20/331	485/18862	0.000387892	0.00570537	0.0043712	CYBB/RNASE2/LILRB2/VNN1/PPBP/ALDH3B1/C3/MNDA/CDA/GPR84/ITGAM/FCN1/FCGR2A/FPR2/OLR1/SIRPB1/FPR1/LYZ/TNFRSF1B/PTAFR	20
BP	GO:0042092	type 2 immune response	5/331	36/18862	0.000389359	0.00570537	0.0043712	IL6/CD74/GATA3/NLRP3/CCR2	5
BP	GO:0007204	positive regulation of cytosolic calcium ion concentration	15/331	310/18862	0.000406275	0.00592933	0.00454279	SAA1/C5AR2/TGM2/CXCL11/NPSR1/FPR2/GPR65/FPR3/FPR1/CXCL10/CCR2/CCR1/P2RY1/HAP1/ADCY8	15
BP	GO:1903706	regulation of hemopoiesis	18/331	415/18862	0.00041707	0.00606253	0.00464484	CSF2/NFE2/TNF/LILRB2/VNN1/CD74/GATA3/NLRP3/HLA-DRB1/CSF3/H3C7/HLA-DRA/FCGR2B/CD80/INHBA/CCR2/CCR1/SHH	18
BP	GO:0002283	neutrophil activation involved in immune response	20/331	488/18862	0.000419507	0.00607366	0.00465337	CYBB/RNASE2/LILRB2/VNN1/PPBP/ALDH3B1/C3/MNDA/CDA/GPR84/ITGAM/FCN1/FCGR2A/FPR2/OLR1/SIRPB1/FPR1/LYZ/TNFRSF1B/PTAFR	20
BP	GO:0050708	regulation of protein secretion	14/331	279/18862	0.000438797	0.00629706	0.00482453	IL6/TNF/FGA/VEGFC/SAA1/FGG/HLA-DRB1/CAMK2N1/IL1B/NOS2/KRT20/DPP4/IL1A/ADCY8	14
BP	GO:1902105	regulation of leukocyte differentiation	14/331	279/18862	0.000438797	0.00629706	0.00482453	TNF/LILRB2/VNN1/CD74/GATA3/NLRP3/HLA-DRB1/HLA-DRA/FCGR2B/CD80/INHBA/CCR2/CCR1/SHH	14
BP	GO:0072111	cell proliferation involved in kidney development	4/331	21/18862	0.000440136	0.00629706	0.00482453	GATA3/BMP2/GPC3/SHH	4
BP	GO:0032651	regulation of interleukin-1 beta production	8/331	103/18862	0.000462873	0.00659639	0.00505386	IL6/TNF/TLR8/MNDA/NLRP3/LILRA5/NLRP2/CARD18	8
BP	GO:0006766	vitamin metabolic process	9/331	130/18862	0.000485627	0.00689363	0.0052816	CYP27B1/SNAI1/TNF/VNN1/TKTL1/CYP24A1/CYP4F3/CYP26A1/CYP4F11	9
BP	GO:0001942	hair follicle development	7/331	80/18862	0.000510273	0.00721529	0.00552804	SNAI1/TNF/TGM3/INHBA/FOXE1/SHH/SOX21	7
BP	GO:1901617	organic hydroxy compound biosynthetic process	13/331	251/18862	0.00051844	0.00730237	0.00559476	CYP27B1/SNAI1/ALOX15/TNF/IP6K3/MOXD1/AKR1C4/GATA3/DDC/BMP2/PTAFR/P2RY1/CES1	13
BP	GO:0010038	response to metal ion	16/331	352/18862	0.000522451	0.00732672	0.00561341	DUSP1/CYBB/CPS1/FABP4/MT1A/ALOX15/FGA/FGG/SYT12/MT2A/C1QA/SLC30A3/AQP1/IL1A/ADCY8/SHH	16
BP	GO:2000351	regulation of endothelial cell apoptotic process	6/331	58/18862	0.000524201	0.00732672	0.00561341	CCL2/TNF/FGA/FGG/GATA3/NDNF	6
BP	GO:0002285	lymphocyte activation involved in immune response	11/331	189/18862	0.000527497	0.0073309	0.00561661	IL6/RORC/CD74/GATA3/NLRP3/HLA-DRB1/GPR183/HLA-DRA/FCGR2B/CD80/HLA-DMB	11
BP	GO:0010888	negative regulation of lipid storage	4/331	22/18862	0.000530552	0.0073309	0.00561661	IL6/TNF/ITGB3/CES1	4
BP	GO:0042359	vitamin D metabolic process	4/331	22/18862	0.000530552	0.0073309	0.00561661	CYP27B1/SNAI1/TNF/CYP24A1	4
BP	GO:0031214	biomineral tissue development	10/331	160/18862	0.000539457	0.0074257	0.00568925	CYP27B1/ALOX15/WNT6/ITGB6/SRGN/BMP2/CCR1/NELL1/GPC3/FBN2	10
BP	GO:0050672	negative regulation of lymphocyte proliferation	7/331	81/18862	0.00055028	0.0075461	0.00578149	LILRB2/MNDA/HLA-DRB1/FCGR2B/CD80/VSIG4/SHH	7
BP	GO:0002440	production of molecular mediator of immune response	14/331	286/18862	0.000561044	0.00766478	0.00587242	IGLV7-46/IL6/HLA-DQB1/TNF/IL13RA2/CD74/GATA3/NLRP3/HLA-DRB1/FCGR2B/IL1B/KLK5/TNFRSF1B/CCR2	14
BP	GO:0019369	arachidonic acid metabolic process	6/331	59/18862	0.000575054	0.00769335	0.00589431	ALOX15/CYP1B1/CYP2C18/CYP2A6/CYP4F3/CYP4F11	6
BP	GO:0032663	regulation of interleukin-2 production	6/331	59/18862	0.000575054	0.00769335	0.00589431	GATA3/CD80/IL1B/VSIG4/CCR2/IL1A	6
BP	GO:0001660	fever generation	3/331	10/18862	0.000586422	0.00769335	0.00589431	TNF/IL1B/IL1A	3
BP	GO:0002524	hypersensitivity	3/331	10/18862	0.000586422	0.00769335	0.00589431	C3/GATA3/FCGR2B	3
BP	GO:0030647	aminoglycoside antibiotic metabolic process	3/331	10/18862	0.000586422	0.00769335	0.00589431	AKR1C4/AKR1C2/AKR1B10	3
BP	GO:0030656	regulation of vitamin metabolic process	3/331	10/18862	0.000586422	0.00769335	0.00589431	CYP27B1/SNAI1/TNF	3
BP	GO:0032754	positive regulation of interleukin-5 production	3/331	10/18862	0.000586422	0.00769335	0.00589431	GATA3/IL1RL1/TSLP	3
BP	GO:0033083	regulation of immature T cell proliferation	3/331	10/18862	0.000586422	0.00769335	0.00589431	IL1B/IL1A/SHH	3
BP	GO:0042368	vitamin D biosynthetic process	3/331	10/18862	0.000586422	0.00769335	0.00589431	CYP27B1/SNAI1/TNF	3
BP	GO:0043301	negative regulation of leukocyte degranulation	3/331	10/18862	0.000586422	0.00769335	0.00589431	IL13RA2/FCGR2B/CCR2	3
BP	GO:0072178	nephric duct morphogenesis	3/331	10/18862	0.000586422	0.00769335	0.00589431	GATA3/EPHA7/GPC3	3
BP	GO:0032945	negative regulation of mononuclear cell proliferation	7/331	82/18862	0.000592742	0.00774342	0.00593267	LILRB2/MNDA/HLA-DRB1/FCGR2B/CD80/VSIG4/SHH	7
BP	GO:0110148	biomineralization	10/331	162/18862	0.0005945	0.00774342	0.00593267	CYP27B1/ALOX15/WNT6/ITGB6/SRGN/BMP2/CCR1/NELL1/GPC3/FBN2	10
BP	GO:0030900	forebrain development	16/331	357/18862	0.00060825	0.00789421	0.0060482	FEZF1/ITGAM/OTX1/BCL2A1/OTX2/PITX1/CSF1R/BMP2/INHBA/AQP1/DLX5/NDNF/HAP1/SOX2/NTRK2/SHH	16
BP	GO:0061098	positive regulation of protein tyrosine kinase activity	6/331	60/18862	0.000629655	0.00813207	0.00623044	EREG/LILRA5/ADORA1/CSF1R/AREG/NTRK2	6
BP	GO:0002708	positive regulation of lymphocyte mediated immunity	8/331	108/18862	0.000635529	0.00813207	0.00623044	IL6/TNF/C3/GATA3/NLRP3/HLA-DRB1/HLA-DRA/IL1B	8
BP	GO:0032611	interleukin-1 beta production	8/331	108/18862	0.000635529	0.00813207	0.00623044	IL6/TNF/TLR8/MNDA/NLRP3/LILRA5/NLRP2/CARD18	8
BP	GO:0022404	molting cycle process	7/331	83/18862	0.000637766	0.00813207	0.00623044	SNAI1/TNF/TGM3/INHBA/FOXE1/SHH/SOX21	7
BP	GO:0022405	hair cycle process	7/331	83/18862	0.000637766	0.00813207	0.00623044	SNAI1/TNF/TGM3/INHBA/FOXE1/SHH/SOX21	7
BP	GO:0002449	lymphocyte mediated immunity	16/331	360/18862	0.000665308	0.0084536	0.00647678	IL6/HLA-DQB1/TNF/IL13RA2/TLR8/C3/CD74/GATA3/NLRP3/HLA-DRB1/HLA-DRA/FCGR2B/C1QA/IL1B/TNFRSF1B/CCR2	16
BP	GO:0098773	skin epidermis development	7/331	84/18862	0.000685461	0.00867932	0.00664971	SNAI1/TNF/TGM3/INHBA/FOXE1/SHH/SOX21	7
BP	GO:0032623	interleukin-2 production	6/331	61/18862	0.000688191	0.00868363	0.00665301	GATA3/CD80/IL1B/VSIG4/CCR2/IL1A	6
BP	GO:0042088	T-helper 1 type immune response	5/331	41/18862	0.000720497	0.00905982	0.00694123	HLA-DRB1/IL1RL1/CD80/IL1B/CCR2	5
BP	GO:0002920	regulation of humoral immune response	9/331	138/18862	0.000748366	0.00934558	0.00716017	TNF/C3/C5AR2/FCGR2B/C1QA/IL1B/KLK5/CFB/VSIG4	9
BP	GO:0072006	nephron development	9/331	138/18862	0.000748366	0.00934558	0.00716017	WNT6/ADAMTS16/GATA3/WNK4/BMP2/SIX2/CALB1/GPC3/SHH	9
BP	GO:0008202	steroid metabolic process	15/331	329/18862	0.000751263	0.00934962	0.00716326	CYP27B1/RORC/SNAI1/TNF/AKR1C4/CYP1B1/DHRS2/CYP24A1/CYP2A6/BMP2/CES1/UGT1A7/AKR1C2/CYP26A1/SHH	15
BP	GO:0001503	ossification	17/331	401/18862	0.000772786	0.00958466	0.00734334	IL6/CYP27B1/SNAI1/ALOX15/TNF/VEGFC/SRGN/CYP24A1/BMP2/SIX2/CCR1/NELL1/DLX5/SOX2/GPC3/FBN2/SHH	17
BP	GO:0051051	negative regulation of transport	18/331	438/18862	0.000781685	0.00960867	0.00736174	OSM/TNF/LILRB2/IL13RA2/ITGB3/CD74/NECAB2/FCGR2B/ADORA1/IL1B/WNK4/INHBA/TNFRSF1B/CCR2/P2RY1/FGF12/ADRA2B/SHH	18
BP	GO:0051781	positive regulation of cell division	7/331	86/18862	0.000789313	0.00960867	0.00736174	EREG/OSM/PPBP/VEGFC/IL1B/IL1A/SHH	7
BP	GO:0060021	roof of mouth development	7/331	86/18862	0.000789313	0.00960867	0.00736174	SNAI1/ITGB6/INHBA/DLX6/DLX5/FOXE1/SHH	7
BP	GO:0007188	adenylate cyclase-modulating G protein-coupled receptor signaling pathway	12/331	230/18862	0.000790596	0.00960867	0.00736174	ADGRE1/ADORA1/CXCL11/FPR2/GPR65/FPR1/CXCL10/AKAP12/P2RY1/ADCY8/ADRA2B/MRAP2	12
BP	GO:0033079	immature T cell proliferation	3/331	11/18862	0.000795875	0.00960867	0.00736174	IL1B/IL1A/SHH	3
BP	GO:0098883	synapse pruning	3/331	11/18862	0.000795875	0.00960867	0.00736174	C3/ITGAM/C1QA	3
BP	GO:1902563	regulation of neutrophil activation	3/331	11/18862	0.000795875	0.00960867	0.00736174	ITGAM/FCGR2B/PTAFR	3
BP	GO:2000551	regulation of T-helper 2 cell cytokine production	3/331	11/18862	0.000795875	0.00960867	0.00736174	IL6/GATA3/NLRP3	3
BP	GO:0014002	astrocyte development	5/331	42/18862	0.000806247	0.00966964	0.00740845	IL6/TNF/ROR1/FPR2/C1QA	5
BP	GO:2001239	regulation of extrinsic apoptotic signaling pathway in absence of ligand	5/331	42/18862	0.000806247	0.00966964	0.00740845	CSF2/TNF/IL1B/INHBA/IL1A	5
BP	GO:0001818	negative regulation of cytokine production	16/331	367/18862	0.000816499	0.00968074	0.00741696	IL6/FN1/TNF/TLR8/C5AR2/GATA3/NLRP3/HLA-DRB1/LILRA5/FCGR2B/SRGN/IL1RL1/INHBA/CARD18/VSIG4/POMC	16
BP	GO:0009306	protein secretion	16/331	367/18862	0.000816499	0.00968074	0.00741696	IL6/TNF/FGA/VEGFC/SAA1/FGG/HLA-DRB1/CAMK2N1/SNCG/IL1B/NOS2/KRT20/DPP4/IL1A/ADCY8/RAB3B	16
BP	GO:0014015	positive regulation of gliogenesis	6/331	63/18862	0.000817828	0.00968074	0.00741696	IL6/TNF/IL1B/BMP2/TNFRSF1B/SHH	6
BP	GO:0071677	positive regulation of mononuclear cell migration	6/331	63/18862	0.000817828	0.00968074	0.00741696	CCL7/TNF/FPR2/CXCL10/CCR2/CCR1	6
BP	GO:0035592	establishment of protein localization to extracellular region	16/331	368/18862	0.000840319	0.00991468	0.00759619	IL6/TNF/FGA/VEGFC/SAA1/FGG/HLA-DRB1/CAMK2N1/SNCG/IL1B/NOS2/KRT20/DPP4/IL1A/ADCY8/RAB3B	16
BP	GO:0030282	bone mineralization	8/331	113/18862	0.000856779	0.0100762	0.00771992	CYP27B1/ALOX15/SRGN/BMP2/CCR1/NELL1/GPC3/FBN2	8
BP	GO:0050804	modulation of chemical synaptic transmission	17/331	405/18862	0.000862009	0.010105	0.00774198	CPLX2/CCL2/TNF/LILRB2/ADORA1/SRGN/SYT12/SNCG/IL1B/AKAP12/CCR2/P2RY1/CALB1/HAP1/ADCY8/LRRC4/NTRK2	17
BP	GO:0048143	astrocyte activation	4/331	25/18862	0.000880235	0.0102854	0.00788025	IL6/TNF/FPR2/C1QA	4
BP	GO:0099177	regulation of trans-synaptic signaling	17/331	406/18862	0.000885642	0.0102923	0.00788554	CPLX2/CCL2/TNF/LILRB2/ADORA1/SRGN/SYT12/SNCG/IL1B/AKAP12/CCR2/P2RY1/CALB1/HAP1/ADCY8/LRRC4/NTRK2	17
BP	GO:0050922	negative regulation of chemotaxis	6/331	64/18862	0.000889322	0.0102923	0.00788554	DUSP1/CCL2/C5AR2/SEMA3B/DPP4/SEMA6D	6
BP	GO:0072577	endothelial cell apoptotic process	6/331	64/18862	0.000889322	0.0102923	0.00788554	CCL2/TNF/FGA/FGG/GATA3/NDNF	6
BP	GO:0043300	regulation of leukocyte degranulation	5/331	43/18862	0.000899381	0.0103757	0.00794942	IL13RA2/ITGAM/FCGR2B/CCR2/PTAFR	5
BP	GO:0019882	antigen processing and presentation	12/331	234/18862	0.00091855	0.0105633	0.00809315	HLA-DQA1/HLA-DQB1/CYBB/HLA-DPA1/LILRB2/CD74/HLA-DRB5/HLA-DRB1/HLA-DRA/FCGR2B/HLA-DMB/RAB3B	12
BP	GO:0032729	positive regulation of interferon-gamma production	6/331	65/18862	0.000965534	0.0110686	0.00848028	HLA-DPA1/TNF/TLR8/IL1B/CCR2/TLR7	6
BP	GO:0031348	negative regulation of defense response	12/331	236/18862	0.000988731	0.0112989	0.00865672	SIGLEC10/SAA1/GATA3/NLRP3/HLA-DRB1/SMPDL3B/FCGR2B/ADORA1/FPR2/NT5E/TNFRSF1B/VSIG4	12
BP	GO:0150076	neuroinflammatory response	5/331	44/18862	0.00100029	0.0113951	0.00873046	IL6/TNF/IL1B/TNFRSF1B/ADCY8	5
BP	GO:1901623	regulation of lymphocyte chemotaxis	4/331	26/18862	0.00102602	0.0116517	0.00892702	CCL2/CCL7/CXCL10/CCR2	4
BP	GO:0046635	positive regulation of alpha-beta T cell activation	6/331	66/18862	0.00104667	0.0117118	0.00897303	NLRP3/HLA-DRB1/HLA-DRA/CD80/CCR2/SHH	6
BP	GO:0072678	T cell migration	6/331	66/18862	0.00104667	0.0117118	0.00897303	CCL2/GPR183/CXCL11/GPR15/CXCL10/CCR2	6
BP	GO:0001867	complement activation, lectin pathway	3/331	12/18862	0.00104742	0.0117118	0.00897303	COLEC10/COLEC11/FCN1	3
BP	GO:0001973	G protein-coupled adenosine receptor signaling pathway	3/331	12/18862	0.00104742	0.0117118	0.00897303	NECAB2/ADORA1/P2RY1	3
BP	GO:0035588	G protein-coupled purinergic receptor signaling pathway	3/331	12/18862	0.00104742	0.0117118	0.00897303	NECAB2/ADORA1/P2RY1	3
BP	GO:1903532	positive regulation of secretion by cell	13/331	271/18862	0.00105358	0.0117445	0.00899815	FGA/VEGFC/FGG/HLA-DRB1/ITGAM/CAMK2N1/IL1B/BMP2/INHBA/PTAFR/P2RY1/IL1A/ADCY8	13
BP	GO:0034764	positive regulation of transmembrane transport	11/331	207/18862	0.00111603	0.0123647	0.00947332	CCL2/C3/ACSL5/CXCL11/NPSR1/WNK4/CXCL10/CCR2/PTAFR/HAP1/GPC3	11
BP	GO:0034767	positive regulation of ion transmembrane transport	11/331	207/18862	0.00111603	0.0123647	0.00947332	CCL2/C3/ACSL5/CXCL11/NPSR1/WNK4/CXCL10/CCR2/PTAFR/HAP1/GPC3	11
BP	GO:0038034	signal transduction in absence of ligand	6/331	67/18862	0.00113294	0.0124009	0.00950101	CSF2/TNF/BCL2A1/IL1B/INHBA/IL1A	6
BP	GO:0046637	regulation of alpha-beta T cell differentiation	6/331	67/18862	0.00113294	0.0124009	0.00950101	GATA3/NLRP3/HLA-DRB1/HLA-DRA/CD80/SHH	6
BP	GO:0097192	extrinsic apoptotic signaling pathway in absence of ligand	6/331	67/18862	0.00113294	0.0124009	0.00950101	CSF2/TNF/BCL2A1/IL1B/INHBA/IL1A	6
BP	GO:1905953	negative regulation of lipid localization	6/331	67/18862	0.00113294	0.0124009	0.00950101	IL6/TNF/ITGB3/ADORA1/CES1/SHH	6
BP	GO:0002478	antigen processing and presentation of exogenous peptide antigen	10/331	177/18862	0.00117367	0.0128082	0.00981304	HLA-DQA1/HLA-DQB1/CYBB/HLA-DPA1/CD74/HLA-DRB5/HLA-DRB1/HLA-DRA/FCGR2B/HLA-DMB	10
BP	GO:0002825	regulation of T-helper 1 type immune response	4/331	27/18862	0.00118795	0.0128483	0.00984378	IL1RL1/CD80/IL1B/CCR2	4
BP	GO:0010818	T cell chemotaxis	4/331	27/18862	0.00118795	0.0128483	0.00984378	GPR183/CXCL11/CXCL10/CCR2	4
BP	GO:0031069	hair follicle morphogenesis	4/331	27/18862	0.00118795	0.0128483	0.00984378	SNAI1/TGM3/FOXE1/SHH	4
BP	GO:0090066	regulation of anatomical structure size	19/331	493/18862	0.00120324	0.012975	0.00994089	CPS1/FN1/ALOX15/FGA/FGG/CSF3/HRH2/ADORA1/EPHA7/L1CAM/SEMA3B/ARHGAP40/AQP1/PTAFR/USH1C/P2RY1/SEMA6D/ADRA2B/RAB3B	19
BP	GO:0006909	phagocytosis	16/331	381/18862	0.00120802	0.012988	0.00995081	FCGR3A/CCL2/ALOX15/CEACAM4/TNF/C3/ITGB3/ITGAM/TGM2/FCGR2B/ADORA1/FCN1/FCGR2A/FPR2/IL1B/SIRPB1	16
BP	GO:0002686	negative regulation of leukocyte migration	5/331	46/18862	0.00122701	0.0131145	0.0100478	DUSP1/CCL2/C5AR2/ADORA1/DPP4	5
BP	GO:0050919	negative chemotaxis	5/331	46/18862	0.00122701	0.0131145	0.0100478	ITGB3/EPHA7/SEMA3B/DPP4/SEMA6D	5
BP	GO:0007411	axon guidance	13/331	277/18862	0.0012841	0.0136845	0.0104845	FEZF1/GATA3/OTX2/VSTM2L/NRXN3/EPHA7/L1CAM/CSF1R/SEMA3B/DLX5/SEMA6D/SHH/ARTN	13
BP	GO:0050767	regulation of neurogenesis	15/331	348/18862	0.00131886	0.0137582	0.0105409	IL6/FEZF1/FN1/TNF/VEGFC/EPHA7/L1CAM/IL1B/BMP2/SEMA3B/TNFRSF1B/HAP1/SEMA6D/NTRK2/SHH	15
BP	GO:0042531	positive regulation of tyrosine phosphorylation of STAT protein	6/331	69/18862	0.00132172	0.0137582	0.0105409	CSF2/IL6/OSM/TNF/CSF1R/TSLP	6
BP	GO:0097485	neuron projection guidance	13/331	278/18862	0.00132632	0.0137582	0.0105409	FEZF1/GATA3/OTX2/VSTM2L/NRXN3/EPHA7/L1CAM/CSF1R/SEMA3B/DLX5/SEMA6D/SHH/ARTN	13
BP	GO:0015837	amine transport	7/331	94/18862	0.00133503	0.0137582	0.0105409	ADORA1/SYT12/SNCG/DDC/P2RY1/ADRA2B/RAB3B	7
BP	GO:0070167	regulation of biomineral tissue development	7/331	94/18862	0.00133503	0.0137582	0.0105409	CYP27B1/WNT6/SRGN/BMP2/CCR1/NELL1/FBN2	7
BP	GO:1904035	regulation of epithelial cell apoptotic process	7/331	94/18862	0.00133503	0.0137582	0.0105409	IL6/CCL2/TNF/FGA/FGG/GATA3/NDNF	7
BP	GO:0002674	negative regulation of acute inflammatory response	3/331	13/18862	0.00134402	0.0137582	0.0105409	NLRP3/FCGR2B/ADORA1	3
BP	GO:0032725	positive regulation of granulocyte macrophage colony-stimulating factor production	3/331	13/18862	0.00134402	0.0137582	0.0105409	PAEP/CD80/IL1B	3
BP	GO:0035745	T-helper 2 cell cytokine production	3/331	13/18862	0.00134402	0.0137582	0.0105409	IL6/GATA3/NLRP3	3
BP	GO:0042182	ketone catabolic process	3/331	13/18862	0.00134402	0.0137582	0.0105409	CYP4F3/ALDH8A1/CYP4F11	3
BP	GO:0042362	fat-soluble vitamin biosynthetic process	3/331	13/18862	0.00134402	0.0137582	0.0105409	CYP27B1/SNAI1/TNF	3
BP	GO:0045741	positive regulation of epidermal growth factor-activated receptor activity	3/331	13/18862	0.00134402	0.0137582	0.0105409	EREG/ADORA1/AREG	3
BP	GO:0072176	nephric duct development	3/331	13/18862	0.00134402	0.0137582	0.0105409	GATA3/EPHA7/GPC3	3
BP	GO:1900452	regulation of long-term synaptic depression	3/331	13/18862	0.00134402	0.0137582	0.0105409	LILRB2/ADORA1/ADCY8	3
BP	GO:0042572	retinol metabolic process	5/331	47/18862	0.00135362	0.0138176	0.0105864	ADH1C/CYP1B1/RDH12/ADH7/AKR1B10	5
BP	GO:0003018	vascular process in circulatory system	12/331	245/18862	0.0013622	0.0138662	0.0106237	SLCO2B1/CPS1/FGA/FGG/HRH2/ADORA1/SLC5A5/AKAP12/PTAFR/P2RY1/ADRA2B/ABCC5	12
BP	GO:0001822	kidney development	13/331	280/18862	0.00141425	0.0143558	0.0109988	WNT6/ADAMTS16/GATA3/EPHA7/WNK4/BMP2/SIX2/CALB1/FREM2/GPC3/CYP26A1/DACT2/SHH	13
BP	GO:0110149	regulation of biomineralization	7/331	96/18862	0.0015091	0.015276	0.0117038	CYP27B1/WNT6/SRGN/BMP2/CCR1/NELL1/FBN2	7
BP	GO:0001773	myeloid dendritic cell activation	4/331	29/18862	0.00156398	0.0157875	0.0120957	CSF2/ITGB6/DHRS2/BATF2	4
BP	GO:2001236	regulation of extrinsic apoptotic signaling pathway	9/331	154/18862	0.00162024	0.0162824	0.0124748	CSF2/TNF/FGA/FGG/G0S2/IL1B/INHBA/IL1A/PAK5	9
BP	GO:0050769	positive regulation of neurogenesis	11/331	217/18862	0.00162822	0.0162824	0.0124748	IL6/FN1/TNF/VEGFC/L1CAM/IL1B/BMP2/TNFRSF1B/HAP1/NTRK2/SHH	11
BP	GO:0097191	extrinsic apoptotic signaling pathway	11/331	217/18862	0.00162822	0.0162824	0.0124748	CSF2/TNF/FGA/FGG/BCL2A1/G0S2/IL1B/INHBA/TNFRSF1B/IL1A/PAK5	11
BP	GO:0019884	antigen processing and presentation of exogenous antigen	10/331	185/18862	0.00163433	0.0162824	0.0124748	HLA-DQA1/HLA-DQB1/CYBB/HLA-DPA1/CD74/HLA-DRB5/HLA-DRB1/HLA-DRA/FCGR2B/HLA-DMB	10
BP	GO:0046638	positive regulation of alpha-beta T cell differentiation	5/331	49/18862	0.00163541	0.0162824	0.0124748	NLRP3/HLA-DRB1/HLA-DRA/CD80/SHH	5
BP	GO:0001763	morphogenesis of a branching structure	10/331	186/18862	0.00170099	0.0168891	0.0129397	TNF/WNT6/ADAMTS16/RSPO3/TGM2/EPHA7/BMP2/SIX2/GPC3/SHH	10
BP	GO:0051701	biological process involved in interaction with host	11/331	219/18862	0.00175075	0.0173357	0.0132819	ITGB6/ITGB3/CD74/HLA-DRB1/FCN1/GPR15/CD80/SIGLEC1/SELPLG/CLDN6/DPP4	11
BP	GO:0033077	T cell differentiation in thymus	6/331	73/18862	0.00177046	0.0174832	0.0133949	VNN1/CD74/GATA3/IL1B/IL1A/SHH	6
BP	GO:0032743	positive regulation of interleukin-2 production	4/331	30/18862	0.00177992	0.017529	0.01343	CD80/IL1B/CCR2/IL1A	4
BP	GO:0072001	renal system development	13/331	288/18862	0.00181589	0.0177606	0.0136074	WNT6/ADAMTS16/GATA3/EPHA7/WNK4/BMP2/SIX2/CALB1/FREM2/GPC3/CYP26A1/DACT2/SHH	13
BP	GO:0035296	regulation of tube diameter	8/331	127/18862	0.0018181	0.0177606	0.0136074	CPS1/FGA/FGG/HRH2/ADORA1/PTAFR/P2RY1/ADRA2B	8
BP	GO:0097746	blood vessel diameter maintenance	8/331	127/18862	0.0018181	0.0177606	0.0136074	CPS1/FGA/FGG/HRH2/ADORA1/PTAFR/P2RY1/ADRA2B	8
BP	GO:0010469	regulation of signaling receptor activity	10/331	188/18862	0.00184092	0.0179354	0.0137413	EREG/CCL2/TNF/FCGR2B/ADORA1/AREG/CCR2/P2RY1/ADH7/ADRA2B	10
BP	GO:0035150	regulation of tube size	8/331	128/18862	0.0019104	0.0185508	0.0142128	CPS1/FGA/FGG/HRH2/ADORA1/PTAFR/P2RY1/ADRA2B	8
BP	GO:1905952	regulation of lipid localization	10/331	189/18862	0.0019143	0.0185508	0.0142128	IL6/TNF/C3/ITGB3/ACSL5/ADORA1/IL1B/CES1/POMC/SHH	10
BP	GO:0010720	positive regulation of cell development	13/331	290/18862	0.00192982	0.0186515	0.01429	IL6/FN1/TNF/FGA/VEGFC/FGG/L1CAM/IL1B/BMP2/TNFRSF1B/HAP1/NTRK2/SHH	13
BP	GO:0003002	regionalization	14/331	326/18862	0.00195611	0.018824	0.0144221	FEZF1/SNAI1/C3/ITGAM/OTX1/OTX2/C1QA/BMP2/SIX2/MSGN1/GPC3/DMRT3/DMRT2/SHH	14
BP	GO:0043370	regulation of CD4-positive, alpha-beta T cell differentiation	5/331	51/18862	0.00195802	0.018824	0.0144221	GATA3/NLRP3/HLA-DRB1/HLA-DRA/CD80	5
BP	GO:0045907	positive regulation of vasoconstriction	4/331	31/18862	0.00201568	0.0192356	0.0147375	FGA/FGG/HRH2/PTAFR	4
BP	GO:0048730	epidermis morphogenesis	4/331	31/18862	0.00201568	0.0192356	0.0147375	SNAI1/TGM3/FOXE1/SHH	4
BP	GO:0001649	osteoblast differentiation	11/331	223/18862	0.0020184	0.0192356	0.0147375	IL6/SNAI1/TNF/VEGFC/CYP24A1/BMP2/NELL1/DLX5/SOX2/FBN2/SHH	11
BP	GO:0046634	regulation of alpha-beta T cell activation	7/331	101/18862	0.00202201	0.0192356	0.0147375	GATA3/NLRP3/HLA-DRB1/HLA-DRA/CD80/CCR2/SHH	7
BP	GO:1903793	positive regulation of anion transport	18/331	478/18862	0.00206886	0.0195825	0.0150033	TNF/FGA/VEGFC/FGG/C3/HLA-DRB1/ITGAM/CAMK2N1/ACSL5/ADORA1/IL1B/PTAFR/IL1A/CES1/ADCY8/GPC3/RAB3B/SHH	18
BP	GO:0032147	activation of protein kinase activity	14/331	328/18862	0.00206926	0.0195825	0.0150033	DUSP5/AGAP2/TNF/SAA1/ITGB3/CD74/ADORA1/IL1B/BMP2/FPR1/PAK5/ADCY8/ADRA2B/GPRC5D	14
BP	GO:0032645	regulation of granulocyte macrophage colony-stimulating factor production	3/331	15/18862	0.00208329	0.0196131	0.0150267	PAEP/CD80/IL1B	3
BP	GO:0051044	positive regulation of membrane protein ectodomain proteolysis	3/331	15/18862	0.00208329	0.0196131	0.0150267	TNF/IL1B/TNFRSF1B	3
BP	GO:0048015	phosphatidylinositol-mediated signaling	10/331	192/18862	0.00214871	0.0201768	0.0154585	FN1/OSM/TNF/ROR1/GATA3/CSF3/CRNN/CSF1R/PTAFR/NTRK2	10
BP	GO:0007492	endoderm development	6/331	76/18862	0.00217641	0.0203319	0.0155774	DUSP5/DUSP1/FN1/DUSP4/INHBA/SOX2	6
BP	GO:0030500	regulation of bone mineralization	6/331	76/18862	0.00217641	0.0203319	0.0155774	CYP27B1/SRGN/BMP2/CCR1/NELL1/FBN2	6
BP	GO:0002429	immune response-activating cell surface receptor signaling pathway	18/331	481/18862	0.00221329	0.0205706	0.0157603	THEMIS2/HLA-DQA1/HLA-DQB1/FCGR3A/HLA-DPA1/C5AR2/MNDA/HLA-DRB5/GATA3/HLA-DRB1/HLA-DRA/FCGR2B/FCN1/FCGR2A/FPR2/FPR3/FPR1/MUC21	18
BP	GO:0002757	immune response-activating signal transduction	18/331	481/18862	0.00221329	0.0205706	0.0157603	THEMIS2/HLA-DQA1/HLA-DQB1/FCGR3A/HLA-DPA1/C5AR2/MNDA/HLA-DRB5/GATA3/HLA-DRB1/HLA-DRA/FCGR2B/FCN1/FCGR2A/FPR2/FPR3/FPR1/MUC21	18
BP	GO:0007200	phospholipase C-activating G protein-coupled receptor signaling pathway	7/331	103/18862	0.00226129	0.0207463	0.0158949	C5AR2/TGM2/FPR2/GPR65/FPR3/FPR1/P2RY1	7
BP	GO:2001237	negative regulation of extrinsic apoptotic signaling pathway	7/331	103/18862	0.00226129	0.0207463	0.0158949	CSF2/TNF/FGA/FGG/IL1B/IL1A/PAK5	7
BP	GO:0002861	regulation of inflammatory response to antigenic stimulus	4/331	32/18862	0.00227216	0.0207463	0.0158949	TNF/C3/HLA-DRB1/FCGR2B	4
BP	GO:0035590	purinergic nucleotide receptor signaling pathway	4/331	32/18862	0.00227216	0.0207463	0.0158949	NECAB2/ADORA1/PTAFR/P2RY1	4
BP	GO:0043372	positive regulation of CD4-positive, alpha-beta T cell differentiation	4/331	32/18862	0.00227216	0.0207463	0.0158949	NLRP3/HLA-DRB1/HLA-DRA/CD80	4
BP	GO:1901099	negative regulation of signal transduction in absence of ligand	4/331	32/18862	0.00227216	0.0207463	0.0158949	CSF2/TNF/IL1B/IL1A	4
BP	GO:2001240	negative regulation of extrinsic apoptotic signaling pathway in absence of ligand	4/331	32/18862	0.00227216	0.0207463	0.0158949	CSF2/TNF/IL1B/IL1A	4
BP	GO:0048002	antigen processing and presentation of peptide antigen	10/331	194/18862	0.00231744	0.0211067	0.016171	HLA-DQA1/HLA-DQB1/CYBB/HLA-DPA1/CD74/HLA-DRB5/HLA-DRB1/HLA-DRA/FCGR2B/HLA-DMB	10
BP	GO:0002720	positive regulation of cytokine production involved in immune response	5/331	53/18862	0.00232483	0.0211211	0.0161821	IL6/CD74/GATA3/NLRP3/IL1B	5
BP	GO:0060284	regulation of cell development	18/331	485/18862	0.00241897	0.0219216	0.0167953	IL6/FEZF1/FN1/TNF/FGA/VEGFC/FGG/PAEP/EPHA7/L1CAM/IL1B/BMP2/SEMA3B/TNFRSF1B/HAP1/SEMA6D/NTRK2/SHH	18
BP	GO:0048017	inositol lipid-mediated signaling	10/331	196/18862	0.00249665	0.0223782	0.0171452	FN1/OSM/TNF/ROR1/GATA3/CSF3/CRNN/CSF1R/PTAFR/NTRK2	10
BP	GO:0042303	molting cycle	7/331	105/18862	0.00252185	0.0223782	0.0171452	SNAI1/TNF/TGM3/INHBA/FOXE1/SHH/SOX21	7
BP	GO:0042633	hair cycle	7/331	105/18862	0.00252185	0.0223782	0.0171452	SNAI1/TNF/TGM3/INHBA/FOXE1/SHH/SOX21	7
BP	GO:0031649	heat generation	3/331	16/18862	0.00253094	0.0223782	0.0171452	TNF/IL1B/IL1A	3
BP	GO:0032604	granulocyte macrophage colony-stimulating factor production	3/331	16/18862	0.00253094	0.0223782	0.0171452	PAEP/CD80/IL1B	3
BP	GO:0034310	primary alcohol catabolic process	3/331	16/18862	0.00253094	0.0223782	0.0171452	ALDH3B1/ADH7/AKR1B10	3
BP	GO:0045591	positive regulation of regulatory T cell differentiation	3/331	16/18862	0.00253094	0.0223782	0.0171452	LILRB2/HLA-DRB1/HLA-DRA	3
BP	GO:0072044	collecting duct development	3/331	16/18862	0.00253094	0.0223782	0.0171452	CALB1/DACT2/SHH	3
BP	GO:0090594	inflammatory response to wounding	3/331	16/18862	0.00253094	0.0223782	0.0171452	SIGLEC10/CCR2/IL1A	3
BP	GO:0099509	regulation of presynaptic cytosolic calcium ion concentration	3/331	16/18862	0.00253094	0.0223782	0.0171452	ADORA1/P2RY1/CALB1	3
BP	GO:0050869	negative regulation of B cell activation	4/331	33/18862	0.00255027	0.0224399	0.0171925	SAMSN1/MNDA/FCGR2B/INHBA	4
BP	GO:0070050	neuron cellular homeostasis	4/331	33/18862	0.00255027	0.0224399	0.0171925	IL6/ADORA1/P2RY1/CALB1	4
BP	GO:0006066	alcohol metabolic process	15/331	373/18862	0.0025795	0.0226423	0.0173475	CYP27B1/ADH1C/IP6K3/MOXD1/AKR1C4/ALDH3B1/CYP1B1/BMP2/PTAFR/P2RY1/RDH12/CES1/AKR1C2/ADH7/AKR1B10	15
BP	GO:0043523	regulation of neuron apoptotic process	10/331	197/18862	0.00259034	0.0226826	0.0173784	CCL2/AGAP2/TNF/GATA3/ITGAM/VSTM2L/EPHA7/NDNF/GABRA5/NTRK2	10
BP	GO:0050678	regulation of epithelial cell proliferation	15/331	374/18862	0.00264566	0.0230704	0.0176755	EREG/CCL2/TNF/VEGFC/ITGB3/C5AR2/GATA3/CRNN/AREG/BMP2/DLX6/DLX5/SOX2/GPC3/SHH	15
BP	GO:0015844	monoamine transport	6/331	79/18862	0.0026489	0.0230704	0.0176755	ITGB3/SYT12/SNCG/P2RY1/ADRA2B/RAB3B	6
BP	GO:0048762	mesenchymal cell differentiation	11/331	231/18862	0.00265367	0.0230704	0.0176755	IL6/FN1/SNAI1/GATA3/VASN/IL1B/BMP2/SIX2/SEMA3B/SEMA6D/SHH	11
BP	GO:0007259	receptor signaling pathway via JAK-STAT	9/331	166/18862	0.00270092	0.0234252	0.0179473	CSF2/IL6/CCL2/OSM/TNF/CYP1B1/CSF1R/TSLP/CCR2	9
BP	GO:2000352	negative regulation of endothelial cell apoptotic process	4/331	34/18862	0.00285087	0.0246668	0.0188986	FGA/FGG/GATA3/NDNF	4
BP	GO:0010883	regulation of lipid storage	5/331	56/18862	0.00296532	0.0255961	0.0196106	IL6/TNF/C3/ITGB3/CES1	5
BP	GO:0140353	lipid export from cell	6/331	81/18862	0.00300407	0.0258692	0.0198198	ADORA1/IL1B/NOS2/INHBA/POMC/NTRK2	6
BP	GO:0007596	blood coagulation	14/331	342/18862	0.00302277	0.0258785	0.019827	IL6/FN1/NFE2/FGA/SAA1/FGG/ITGB3/GATA3/H3C7/TFPI2/P2RY1/ADRA2B/CYP4F11/SHH	14
BP	GO:0002888	positive regulation of myeloid leukocyte mediated immunity	3/331	17/18862	0.00303364	0.0258785	0.019827	C3/ITGAM/PTAFR	3
BP	GO:0015732	prostaglandin transport	3/331	17/18862	0.00303364	0.0258785	0.019827	SLCO2A1/IL1B/NOS2	3
BP	GO:0150078	positive regulation of neuroinflammatory response	3/331	17/18862	0.00303364	0.0258785	0.019827	IL6/TNF/IL1B	3
BP	GO:0098754	detoxification	8/331	138/18862	0.00305148	0.0259697	0.0198969	GSTM1/MT1A/MT2A/GSTA1/RDH12/GPX2/GSTM3/AKR1B10	8
BP	GO:0030099	myeloid cell differentiation	16/331	419/18862	0.0031402	0.0266054	0.0203839	CSF2/NFE2/TNF/ITGB6/CD74/GATA3/HLA-DRB1/CSF3/GPR183/H3C7/DHRS2/BATF2/CSF1R/INHBA/CCR1/GPC3	16
BP	GO:0015850	organic hydroxy compound transport	12/331	271/18862	0.00314082	0.0266054	0.0203839	SLCO2B1/AKR1C4/ITGB3/SYT12/SNCG/AQP1/P2RY1/CES1/POMC/ADRA2B/RAB3B/SHH	12
BP	GO:0042471	ear morphogenesis	7/331	110/18862	0.0032744	0.0276725	0.0212014	GATA3/OTX1/USH1G/SIX2/DLX6/DLX5/USH1C	7
BP	GO:0060562	epithelial tube morphogenesis	13/331	309/18862	0.00333638	0.0281309	0.0215526	TNF/WNT6/ADAMTS16/GATA3/MICAL2/EPHA7/CSF1R/WNK4/BMP2/SIX2/CXCL10/GPC3/SHH	13
BP	GO:0007599	hemostasis	14/331	346/18862	0.00335327	0.0282078	0.0216116	IL6/FN1/NFE2/FGA/SAA1/FGG/ITGB3/GATA3/H3C7/TFPI2/P2RY1/ADRA2B/CYP4F11/SHH	14
BP	GO:0060291	long-term synaptic potentiation	6/331	83/18862	0.00339366	0.0284816	0.0218214	LILRB2/ADORA1/SYT12/CALB1/ADCY8/NTRK2	6
BP	GO:0050817	coagulation	14/331	347/18862	0.00344036	0.028807	0.0220707	IL6/FN1/NFE2/FGA/SAA1/FGG/ITGB3/GATA3/H3C7/TFPI2/P2RY1/ADRA2B/CYP4F11/SHH	14
BP	GO:0003176	aortic valve development	4/331	36/18862	0.00352302	0.0293488	0.0224857	SNAI1/GATA3/BMP2/TNFRSF1B	4
BP	GO:0030224	monocyte differentiation	4/331	36/18862	0.00352302	0.0293488	0.0224857	CSF2/CD74/HLA-DRB1/CSF1R	4
BP	GO:0019058	viral life cycle	14/331	348/18862	0.00352928	0.0293488	0.0224857	CCL2/TNF/ITGB6/ITGB3/CD74/HLA-DRB1/FCN1/GPR15/CD80/SIGLEC1/SELPLG/CLDN6/CCL8/DPP4	14
BP	GO:0061138	morphogenesis of a branching epithelium	9/331	173/18862	0.00355565	0.0294891	0.0225933	TNF/WNT6/ADAMTS16/RSPO3/TGM2/BMP2/SIX2/GPC3/SHH	9
BP	GO:0006957	complement activation, alternative pathway	3/331	18/18862	0.00359346	0.0294891	0.0225933	C3/CFB/VSIG4	3
BP	GO:0032656	regulation of interleukin-13 production	3/331	18/18862	0.00359346	0.0294891	0.0225933	GATA3/LILRA5/TSLP	3
BP	GO:0060252	positive regulation of glial cell proliferation	3/331	18/18862	0.00359346	0.0294891	0.0225933	IL6/TNF/IL1B	3
BP	GO:0042475	odontogenesis of dentin-containing tooth	6/331	84/18862	0.00360198	0.0294891	0.0225933	WNT6/ITGB6/KLK5/BMP2/DMRT3/SHH	6
BP	GO:0021782	glial cell development	7/331	112/18862	0.0036192	0.0294891	0.0225933	IL6/TNF/ROR1/FPR2/C1QA/NTRK2/SHH	7
BP	GO:0030278	regulation of ossification	7/331	112/18862	0.0036192	0.0294891	0.0225933	CYP27B1/SRGN/BMP2/SIX2/CCR1/NELL1/FBN2	7
BP	GO:0030326	embryonic limb morphogenesis	7/331	112/18862	0.0036192	0.0294891	0.0225933	PITX1/DLX6/DLX5/FREM2/GPC3/FBN2/SHH	7
BP	GO:0035113	embryonic appendage morphogenesis	7/331	112/18862	0.0036192	0.0294891	0.0225933	PITX1/DLX6/DLX5/FREM2/GPC3/FBN2/SHH	7
BP	GO:0019730	antimicrobial humoral response	8/331	142/18862	0.00363373	0.0295413	0.0226333	PPBP/FGA/CXCL5/COLEC11/CXCL11/KLK5/CXCL10/LYZ	8
BP	GO:0007389	pattern specification process	16/331	426/18862	0.00368674	0.0299054	0.0229122	FEZF1/SNAI1/WNT6/C3/ITGAM/OTX1/OTX2/MICAL2/C1QA/BMP2/SIX2/MSGN1/GPC3/DMRT3/DMRT2/SHH	16
BP	GO:0043030	regulation of macrophage activation	5/331	59/18862	0.00372434	0.0301431	0.0230943	IL6/CD74/FCGR2B/IL1RL1/VSIG4	5
BP	GO:0019915	lipid storage	6/331	85/18862	0.00381965	0.0307774	0.0235803	IL6/TNF/C3/ITGB3/IL1B/CES1	6
BP	GO:0042509	regulation of tyrosine phosphorylation of STAT protein	6/331	85/18862	0.00381965	0.0307774	0.0235803	CSF2/IL6/OSM/TNF/CSF1R/TSLP	6
BP	GO:0097696	receptor signaling pathway via STAT	9/331	175/18862	0.00383521	0.0308344	0.023624	CSF2/IL6/CCL2/OSM/TNF/CYP1B1/CSF1R/TSLP/CCR2	9
BP	GO:0050673	epithelial cell proliferation	16/331	428/18862	0.00385654	0.0309374	0.0237029	EREG/IL6/CCL2/TNF/VEGFC/ITGB3/C5AR2/GATA3/CRNN/AREG/BMP2/DLX6/DLX5/SOX2/GPC3/SHH	16
BP	GO:0090276	regulation of peptide hormone secretion	10/331	209/18862	0.00395012	0.0316183	0.0242246	IL6/TNF/FGA/FGG/HLA-DRB1/CAMK2N1/IL1B/NOS2/DPP4/ADCY8	10
BP	GO:0032653	regulation of interleukin-10 production	5/331	60/18862	0.00400568	0.0319926	0.0245113	IL6/HLA-DRB1/LILRA5/FCGR2B/TSLP	5
BP	GO:0051952	regulation of amine transport	6/331	86/18862	0.00404693	0.0322512	0.0247094	ADORA1/SYT12/SNCG/P2RY1/ADRA2B/RAB3B	6
BP	GO:0010001	glial cell differentiation	10/331	210/18862	0.00408496	0.032483	0.0248871	IL6/TNF/ROR1/FPR2/C1QA/BMP2/TNFRSF1B/SOX2/NTRK2/SHH	10
BP	GO:0008217	regulation of blood pressure	9/331	177/18862	0.00413171	0.032783	0.0251169	VEGFC/ADAMTS16/CAMK2N1/ADORA1/NOS2/PTAFR/CES1/POMC/ADRA2B	9
BP	GO:0045926	negative regulation of growth	11/331	245/18862	0.0041475	0.0328366	0.025158	CYP27B1/MT1A/KCNK2/CDA/EPHA7/MT2A/SEMA3B/INHBA/OSGIN1/SEMA6D/GPC3	11
BP	GO:0009110	vitamin biosynthetic process	3/331	19/18862	0.00421228	0.0330614	0.0253302	CYP27B1/SNAI1/TNF	3
BP	GO:0032634	interleukin-5 production	3/331	19/18862	0.00421228	0.0330614	0.0253302	GATA3/IL1RL1/TSLP	3
BP	GO:0032674	regulation of interleukin-5 production	3/331	19/18862	0.00421228	0.0330614	0.0253302	GATA3/IL1RL1/TSLP	3
BP	GO:0048245	eosinophil chemotaxis	3/331	19/18862	0.00421228	0.0330614	0.0253302	CCL2/CCL7/CCL8	3
BP	GO:0006956	complement activation	9/331	178/18862	0.00428652	0.0333327	0.025538	C3/C5AR2/COLEC10/COLEC11/FCN1/C1QA/IL1B/CFB/VSIG4	9
BP	GO:0015718	monocarboxylic acid transport	9/331	178/18862	0.00428652	0.0333327	0.025538	SLCO2B1/AKR1C4/SLCO2A1/ADORA1/IL1B/NOS2/SLC16A4/CES1/NTRK2	9
BP	GO:0010463	mesenchymal cell proliferation	4/331	38/18862	0.00429538	0.0333327	0.025538	BMP2/SIX2/GPC3/SHH	4
BP	GO:0071398	cellular response to fatty acid	4/331	38/18862	0.00429538	0.0333327	0.025538	CPS1/AKR1C4/PTAFR/AKR1C2	4
BP	GO:0019229	regulation of vasoconstriction	5/331	61/18862	0.00430188	0.0333327	0.025538	FGA/FGG/HRH2/PTAFR/ADRA2B	5
BP	GO:1905330	regulation of morphogenesis of an epithelium	5/331	61/18862	0.00430188	0.0333327	0.025538	TNF/GATA3/SIX2/CXCL10/SHH	5
BP	GO:0051235	maintenance of location	13/331	319/18862	0.00435919	0.0337049	0.0258232	IL6/TNF/C3/ITGB3/CXCL11/NPSR1/SRGN/IL1B/SLC30A3/CXCL10/HAP1/CES1/FBN2	13
BP	GO:1904019	epithelial cell apoptotic process	7/331	116/18862	0.00439095	0.0338784	0.0259561	IL6/CCL2/TNF/FGA/FGG/GATA3/NDNF	7
BP	GO:0001655	urogenital system development	13/331	320/18862	0.00447404	0.0344463	0.0263912	WNT6/ADAMTS16/GATA3/EPHA7/WNK4/BMP2/SIX2/CALB1/FREM2/GPC3/CYP26A1/DACT2/SHH	13
BP	GO:0007260	tyrosine phosphorylation of STAT protein	6/331	88/18862	0.00453129	0.0348133	0.0266724	CSF2/IL6/OSM/TNF/CSF1R/TSLP	6
BP	GO:0002437	inflammatory response to antigenic stimulus	5/331	62/18862	0.00461337	0.0352206	0.0269845	TNF/C3/GATA3/HLA-DRB1/FCGR2B	5
BP	GO:0032613	interleukin-10 production	5/331	62/18862	0.00461337	0.0352206	0.0269845	IL6/HLA-DRB1/LILRA5/FCGR2B/TSLP	5
BP	GO:0042490	mechanoreceptor differentiation	5/331	62/18862	0.00461337	0.0352206	0.0269845	MYCL/USH1G/USH1C/GABRA5/NTRK2	5
BP	GO:0045622	regulation of T-helper cell differentiation	4/331	39/18862	0.00472118	0.0358179	0.0274421	NLRP3/HLA-DRB1/HLA-DRA/CD80	4
BP	GO:0045742	positive regulation of epidermal growth factor receptor signaling pathway	4/331	39/18862	0.00472118	0.0358179	0.0274421	EREG/ADORA1/AREG/HAP1	4
BP	GO:2000516	positive regulation of CD4-positive, alpha-beta T cell activation	4/331	39/18862	0.00472118	0.0358179	0.0274421	NLRP3/HLA-DRB1/HLA-DRA/CD80	4
BP	GO:0097306	cellular response to alcohol	6/331	89/18862	0.00478888	0.0362558	0.0277776	CYBB/CCL7/INHBA/CES1/AKR1C2/ADCY8	6
BP	GO:0051928	positive regulation of calcium ion transport	7/331	118/18862	0.00482054	0.0363539	0.0278528	CCL2/LILRA5/CXCL11/NPSR1/CXCL10/CCR1/HAP1	7
BP	GO:0002577	regulation of antigen processing and presentation	3/331	20/18862	0.00489187	0.0363539	0.0278528	LILRB2/CD74/FCGR2B	3
BP	GO:0009713	catechol-containing compound biosynthetic process	3/331	20/18862	0.00489187	0.0363539	0.0278528	MOXD1/GATA3/DDC	3
BP	GO:0019373	epoxygenase P450 pathway	3/331	20/18862	0.00489187	0.0363539	0.0278528	CYP1B1/CYP2C18/CYP2A6	3
BP	GO:0021871	forebrain regionalization	3/331	20/18862	0.00489187	0.0363539	0.0278528	FEZF1/BMP2/SHH	3
BP	GO:0032616	interleukin-13 production	3/331	20/18862	0.00489187	0.0363539	0.0278528	GATA3/LILRA5/TSLP	3
BP	GO:0042423	catecholamine biosynthetic process	3/331	20/18862	0.00489187	0.0363539	0.0278528	MOXD1/GATA3/DDC	3
BP	GO:0060445	branching involved in salivary gland morphogenesis	3/331	20/18862	0.00489187	0.0363539	0.0278528	TNF/TGM2/SHH	3
BP	GO:0150146	cell junction disassembly	3/331	20/18862	0.00489187	0.0363539	0.0278528	C3/ITGAM/C1QA	3
BP	GO:0006081	cellular aldehyde metabolic process	5/331	63/18862	0.00494058	0.0366409	0.0280727	ALDH3B1/CYP1B1/ALDH3A1/BMP2/ALDH8A1	5
BP	GO:0050868	negative regulation of T cell activation	7/331	119/18862	0.00504684	0.0371261	0.0284444	LILRB2/CD74/HLA-DRB1/FCGR2B/CD80/VSIG4/SHH	7
BP	GO:0045834	positive regulation of lipid metabolic process	8/331	150/18862	0.00505321	0.0371261	0.0284444	AGAP2/TNF/CD74/ADORA1/AADAC/FPR2/IL1B/CES1	8
BP	GO:0050777	negative regulation of immune response	8/331	150/18862	0.00505321	0.0371261	0.0284444	SAMSN1/ALOX15/IL13RA2/HLA-DRB1/FCGR2B/IL1RL1/VSIG4/CCR2	8
BP	GO:0014068	positive regulation of phosphatidylinositol 3-kinase signaling	6/331	90/18862	0.00505707	0.0371261	0.0284444	FN1/OSM/TNF/ROR1/CSF3/NTRK2	6
BP	GO:0042472	inner ear morphogenesis	6/331	90/18862	0.00505707	0.0371261	0.0284444	GATA3/OTX1/USH1G/DLX6/DLX5/USH1C	6
BP	GO:0150063	visual system development	14/331	363/18862	0.00510405	0.0373954	0.0286507	WNT6/C3/GATA3/CYP1B1/ITGAM/C1QA/INHBA/USH1C/CALB1/FREM2/SOX2/NTRK2/FBN2/SHH	14
BP	GO:0008207	C21-steroid hormone metabolic process	4/331	40/18862	0.00517445	0.0376079	0.0288135	AKR1C4/DHRS2/BMP2/AKR1C2	4
BP	GO:0045776	negative regulation of blood pressure	4/331	40/18862	0.00517445	0.0376079	0.0288135	VEGFC/ADORA1/NOS2/PTAFR	4
BP	GO:0051281	positive regulation of release of sequestered calcium ion into cytosol	4/331	40/18862	0.00517445	0.0376079	0.0288135	CXCL11/NPSR1/CXCL10/HAP1	4
BP	GO:0150077	regulation of neuroinflammatory response	4/331	40/18862	0.00517445	0.0376079	0.0288135	IL6/TNF/IL1B/TNFRSF1B	4
BP	GO:0002793	positive regulation of peptide secretion	8/331	151/18862	0.00525682	0.0381303	0.0292137	FGA/VEGFC/FGG/HLA-DRB1/CAMK2N1/ADORA1/IL1A/ADCY8	8
BP	GO:0031960	response to corticosteroid	8/331	152/18862	0.00546664	0.0395732	0.0303193	DUSP1/IL6/CYBB/CPS1/TNF/ALDH3A1/AQP1/PTAFR	8
BP	GO:1901216	positive regulation of neuron death	6/331	92/18862	0.0056263	0.0404602	0.0309988	TNF/ITGAM/FCGR2B/ADORA1/EPHA7/C1QA	6
BP	GO:0006590	thyroid hormone generation	3/331	21/18862	0.00563383	0.0404602	0.0309988	GATA3/SLC5A5/FOXE1	3
BP	GO:0016137	glycoside metabolic process	3/331	21/18862	0.00563383	0.0404602	0.0309988	AKR1C4/AKR1C2/AKR1B10	3
BP	GO:0032689	negative regulation of interferon-gamma production	4/331	41/18862	0.00565596	0.0404602	0.0309988	GATA3/HLA-DRB1/IL1RL1/INHBA	4
BP	GO:1901186	positive regulation of ERBB signaling pathway	4/331	41/18862	0.00565596	0.0404602	0.0309988	EREG/ADORA1/AREG/HAP1	4
BP	GO:1905314	semi-lunar valve development	4/331	41/18862	0.00565596	0.0404602	0.0309988	SNAI1/GATA3/BMP2/TNFRSF1B	4
BP	GO:0035270	endocrine system development	7/331	122/18862	0.0057738	0.041222	0.0315825	IL6/GATA3/PITX1/BMP2/SOX2/FOXE1/SHH	7
BP	GO:0048880	sensory system development	14/331	369/18862	0.00587464	0.0418597	0.0320711	WNT6/C3/GATA3/CYP1B1/ITGAM/C1QA/INHBA/USH1C/CALB1/FREM2/SOX2/NTRK2/FBN2/SHH	14
BP	GO:0000187	activation of MAPK activity	8/331	154/18862	0.0059054	0.04191	0.0321096	DUSP5/TNF/SAA1/CD74/IL1B/BMP2/FPR1/ADRA2B	8
BP	GO:0014065	phosphatidylinositol 3-kinase signaling	8/331	154/18862	0.0059054	0.04191	0.0321096	FN1/OSM/TNF/ROR1/GATA3/CSF3/CRNN/NTRK2	8
BP	GO:0014013	regulation of gliogenesis	6/331	93/18862	0.00592783	0.04191	0.0321096	IL6/TNF/IL1B/BMP2/TNFRSF1B/SHH	6
BP	GO:0051591	response to cAMP	6/331	93/18862	0.00592783	0.04191	0.0321096	DUSP1/CPS1/SLC5A5/ALDH3A1/AQP1/PTAFR	6
BP	GO:0042130	negative regulation of T cell proliferation	5/331	66/18862	0.00602058	0.0424831	0.0325487	LILRB2/HLA-DRB1/CD80/VSIG4/SHH	5
BP	GO:0007162	negative regulation of cell adhesion	12/331	295/18862	0.00613236	0.043188	0.0330887	DUSP1/LILRB2/CD74/CYP1B1/HLA-DRB1/FCGR2B/CD80/BMP2/VSIG4/MUC21/DACT2/SHH	12
BP	GO:0006509	membrane protein ectodomain proteolysis	4/331	42/18862	0.00616646	0.0432604	0.0331442	TNF/MMP7/IL1B/TNFRSF1B	4
BP	GO:0046688	response to copper ion	4/331	42/18862	0.00616646	0.0432604	0.0331442	MT1A/MT2A/AQP1/IL1A	4
BP	GO:0061097	regulation of protein tyrosine kinase activity	6/331	94/18862	0.00624097	0.0436988	0.0334801	EREG/LILRA5/ADORA1/CSF1R/AREG/NTRK2	6
BP	GO:0046887	positive regulation of hormone secretion	7/331	124/18862	0.00630017	0.0438231	0.0335753	FGA/FGG/HLA-DRB1/CAMK2N1/INHBA/P2RY1/ADCY8	7
BP	GO:0022408	negative regulation of cell-cell adhesion	9/331	189/18862	0.00630535	0.0438231	0.0335753	LILRB2/CD74/HLA-DRB1/FCGR2B/CD80/BMP2/VSIG4/MUC21/SHH	9
BP	GO:0071248	cellular response to metal ion	9/331	189/18862	0.00630535	0.0438231	0.0335753	CYBB/FABP4/MT1A/ALOX15/SYT12/MT2A/AQP1/ADCY8/SHH	9
BP	GO:0016485	protein processing	10/331	224/18862	0.00638299	0.0438231	0.0335753	CPM/CCBE1/FGA/FGG/KLK6/SRGN/CARD18/PCSK2/CES1/SHH	10
BP	GO:2001234	negative regulation of apoptotic signaling pathway	10/331	224/18862	0.00638299	0.0438231	0.0335753	CSF2/SNAI1/TNF/VNN1/FGA/FGG/CD74/IL1B/IL1A/PAK5	10
BP	GO:0050918	positive chemotaxis	5/331	67/18862	0.00641474	0.0438231	0.0335753	VEGFC/COLEC10/FPR2/CXCL10/ARTN	5
BP	GO:2000514	regulation of CD4-positive, alpha-beta T cell activation	5/331	67/18862	0.00641474	0.0438231	0.0335753	GATA3/NLRP3/HLA-DRB1/HLA-DRA/CD80	5
BP	GO:0048568	embryonic organ development	15/331	412/18862	0.00641652	0.0438231	0.0335753	CSF2/SNAI1/TNF/RSPO3/GATA3/OTX1/MICAL2/USH1G/SIX2/DLX6/DLX5/USH1C/FOXE1/FBN2/SHH	15
BP	GO:0006067	ethanol metabolic process	3/331	22/18862	0.00643961	0.0438231	0.0335753	ADH1C/ALDH3B1/ADH7	3
BP	GO:0035970	peptidyl-threonine dephosphorylation	3/331	22/18862	0.00643961	0.0438231	0.0335753	DUSP5/DUSP1/DUSP4	3
BP	GO:0045061	thymic T cell selection	3/331	22/18862	0.00643961	0.0438231	0.0335753	CD74/GATA3/SHH	3
BP	GO:1901685	glutathione derivative metabolic process	3/331	22/18862	0.00643961	0.0438231	0.0335753	GSTM1/GSTA1/GSTM3	3
BP	GO:1901687	glutathione derivative biosynthetic process	3/331	22/18862	0.00643961	0.0438231	0.0335753	GSTM1/GSTA1/GSTM3	3
BP	GO:1903306	negative regulation of regulated secretory pathway	3/331	22/18862	0.00643961	0.0438231	0.0335753	IL13RA2/FCGR2B/CCR2	3
BP	GO:1904996	positive regulation of leukocyte adhesion to vascular endothelial cell	3/331	22/18862	0.00643961	0.0438231	0.0335753	IL6/TNF/PTAFR	3
BP	GO:0030168	platelet activation	8/331	157/18862	0.00661314	0.0449199	0.0344157	IL6/FN1/FGA/SAA1/FGG/ITGB3/P2RY1/ADRA2B	8
BP	GO:0001707	mesoderm formation	5/331	68/18862	0.00682666	0.0461976	0.0353945	SNAI1/ITGB3/SIX2/INHBA/MSGN1	5
BP	GO:0051937	catecholamine transport	5/331	68/18862	0.00682666	0.0461976	0.0353945	SYT12/SNCG/P2RY1/ADRA2B/RAB3B	5
BP	GO:0051962	positive regulation of nervous system development	11/331	263/18862	0.00697805	0.0471343	0.0361122	IL6/FN1/TNF/VEGFC/L1CAM/IL1B/BMP2/TNFRSF1B/HAP1/NTRK2/SHH	11
BP	GO:0014066	regulation of phosphatidylinositol 3-kinase signaling	7/331	127/18862	0.0071557	0.0482445	0.0369628	FN1/OSM/TNF/ROR1/CSF3/CRNN/NTRK2	7
BP	GO:0002438	acute inflammatory response to antigenic stimulus	3/331	23/18862	0.00731054	0.0489254	0.0374845	C3/GATA3/FCGR2B	3
BP	GO:0016338	calcium-independent cell-cell adhesion via plasma membrane cell-adhesion molecules	3/331	23/18862	0.00731054	0.0489254	0.0374845	BMP2/CLDN6/CLDN20	3
BP	GO:0051043	regulation of membrane protein ectodomain proteolysis	3/331	23/18862	0.00731054	0.0489254	0.0374845	TNF/IL1B/TNFRSF1B	3
BP	GO:0072677	eosinophil migration	3/331	23/18862	0.00731054	0.0489254	0.0374845	CCL2/CCL7/CCL8	3
BP	GO:0002576	platelet degranulation	7/331	128/18862	0.00745914	0.0498282	0.0381762	FN1/PPBP/FGA/VEGFC/FGG/ITGB3/SRGN	7
BP	GO:0051402	neuron apoptotic process	10/331	230/18862	0.00763161	0.0508867	0.0389872	CCL2/AGAP2/TNF/GATA3/ITGAM/VSTM2L/EPHA7/NDNF/GABRA5/NTRK2	10
BP	GO:0045123	cellular extravasation	5/331	70/18862	0.00770536	0.0511906	0.03922	CCL2/TNF/SELPLG/CCR2/PTAFR	5
BP	GO:0048332	mesoderm morphogenesis	5/331	70/18862	0.00770536	0.0511906	0.03922	SNAI1/ITGB3/SIX2/INHBA/MSGN1	5
BP	GO:0050714	positive regulation of protein secretion	7/331	129/18862	0.00777201	0.0515392	0.0394871	FGA/VEGFC/FGG/HLA-DRB1/CAMK2N1/IL1A/ADCY8	7
BP	GO:0060986	endocrine hormone secretion	4/331	45/18862	0.00787906	0.0519646	0.039813	GATA3/IL1B/INHBA/POMC	4
BP	GO:0090102	cochlea development	4/331	45/18862	0.00787906	0.0519646	0.039813	KCNK2/GATA3/CALB1/GABRA5	4
BP	GO:1900271	regulation of long-term synaptic potentiation	4/331	45/18862	0.00787906	0.0519646	0.039813	LILRB2/ADORA1/CALB1/ADCY8	4
BP	GO:0051960	regulation of nervous system development	15/331	422/18862	0.00791934	0.0521357	0.0399441	IL6/FEZF1/FN1/TNF/VEGFC/EPHA7/L1CAM/IL1B/BMP2/SEMA3B/TNFRSF1B/HAP1/SEMA6D/NTRK2/SHH	15
BP	GO:0002702	positive regulation of production of molecular mediator of immune response	6/331	99/18862	0.00798966	0.0523143	0.0400809	IL6/CD74/GATA3/NLRP3/IL1B/KLK5	6
BP	GO:0019233	sensory perception of pain	6/331	99/18862	0.00798966	0.0523143	0.0400809	CCL2/ADORA1/CCR2/PTAFR/P2RY1/SCN9A	6
BP	GO:0051588	regulation of neurotransmitter transport	6/331	99/18862	0.00798966	0.0523143	0.0400809	CPLX2/ITGB3/SYT12/SNCG/P2RY1/RAB3B	6
BP	GO:0046683	response to organophosphorus	7/331	130/18862	0.00809446	0.0529051	0.0405336	DUSP1/CPS1/SLC5A5/ALDH3A1/AQP1/PTAFR/P2RY1	7
BP	GO:0002407	dendritic cell chemotaxis	3/331	24/18862	0.0082478	0.0536181	0.0410798	GPR183/CCR2/CCR1	3
BP	GO:0016540	protein autoprocessing	3/331	24/18862	0.0082478	0.0536181	0.0410798	KLK6/PCSK2/SHH	3
BP	GO:0036315	cellular response to sterol	3/331	24/18862	0.0082478	0.0536181	0.0410798	RORC/INHBA/CES1	3
BP	GO:0097305	response to alcohol	10/331	233/18862	0.0083227	0.0540084	0.0413789	CYBB/CCL7/GATA3/NLRP3/CSF3/INHBA/CES1/AKR1C2/ADH7/ADCY8	10
BP	GO:0010717	regulation of epithelial to mesenchymal transition	6/331	100/18862	0.00837772	0.054172	0.0415042	IL6/SNAI1/GATA3/VASN/IL1B/BMP2	6
BP	GO:0045833	negative regulation of lipid metabolic process	6/331	100/18862	0.00837772	0.054172	0.0415042	CYP27B1/SNAI1/TNF/ADORA1/IL1B/BMP2	6
BP	GO:0048146	positive regulation of fibroblast proliferation	4/331	46/18862	0.00851259	0.0549463	0.0420974	EREG/FN1/CD74/AQP1	4
BP	GO:2001233	regulation of apoptotic signaling pathway	13/331	348/18862	0.00881532	0.0567994	0.0435172	CSF2/SNAI1/TNF/VNN1/FGA/FGG/CD74/G0S2/IL1B/INHBA/IL1A/PAK5/PLEKHF1	13
BP	GO:0043491	protein kinase B signaling	11/331	273/18862	0.00910178	0.0585413	0.0448518	EREG/CCL2/OSM/TNF/GATA3/CSF3/CD80/IL1B/AREG/AKR1C2/NTRK2	11
BP	GO:0030225	macrophage differentiation	4/331	47/18862	0.00917854	0.0587197	0.0449884	CSF2/HLA-DRB1/CSF1R/INHBA	4
BP	GO:0070169	positive regulation of biomineral tissue development	4/331	47/18862	0.00917854	0.0587197	0.0449884	WNT6/BMP2/NELL1/FBN2	4
BP	GO:1903053	regulation of extracellular matrix organization	4/331	47/18862	0.00917854	0.0587197	0.0449884	IL6/BMP2/TNFRSF1B/DPP4	4
BP	GO:0045639	positive regulation of myeloid cell differentiation	6/331	102/18862	0.00919414	0.0587197	0.0449884	TNF/CD74/HLA-DRB1/CSF3/INHBA/CCR1	6
BP	GO:0042537	benzene-containing compound metabolic process	3/331	25/18862	0.00925247	0.0588853	0.0451153	GSTM1/GSTM3/ALDH8A1	3
BP	GO:0050995	negative regulation of lipid catabolic process	3/331	25/18862	0.00925247	0.0588853	0.0451153	TNF/ADORA1/IL1B	3
BP	GO:0035107	appendage morphogenesis	7/331	134/18862	0.0094835	0.0601449	0.0460804	PITX1/DLX6/DLX5/FREM2/GPC3/FBN2/SHH	7
BP	GO:0035108	limb morphogenesis	7/331	134/18862	0.0094835	0.0601449	0.0460804	PITX1/DLX6/DLX5/FREM2/GPC3/FBN2/SHH	7
BP	GO:0044282	small molecule catabolic process	15/331	431/18862	0.00950067	0.0601488	0.0460834	CYP27B1/HPD/ALDH3B1/TKTL1/CDA/CYP24A1/NOS2/NT5E/GLYATL2/ADH7/CYP4F3/AKR1B10/ALDH8A1/CYP26A1/CYP4F11	15
BP	GO:0071260	cellular response to mechanical stimulus	5/331	74/18862	0.00969299	0.0612597	0.0469345	TLR8/MMP7/IL1B/AQP1/TLR7	5
BP	GO:0050890	cognition	11/331	276/18862	0.00982752	0.0615694	0.0471717	TNF/LILRB2/KCNK2/HLA-DRA/ADORA1/NRXN3/CALB1/GABRA5/PAK5/ADCY8/NTRK2	11
BP	GO:0009952	anterior/posterior pattern specification	9/331	203/18862	0.00985002	0.0615694	0.0471717	FEZF1/OTX1/OTX2/BMP2/SIX2/MSGN1/GPC3/DMRT2/SHH	9
BP	GO:0050679	positive regulation of epithelial cell proliferation	9/331	203/18862	0.00985002	0.0615694	0.0471717	VEGFC/ITGB3/C5AR2/CRNN/AREG/BMP2/DLX6/DLX5/SHH	9
BP	GO:0051384	response to glucocorticoid	7/331	135/18862	0.0098564	0.0615694	0.0471717	DUSP1/IL6/CPS1/TNF/ALDH3A1/AQP1/PTAFR	7
BP	GO:0014009	glial cell proliferation	4/331	48/18862	0.00987753	0.0615694	0.0471717	IL6/TNF/CSF1R/IL1B	4
BP	GO:0045058	T cell selection	4/331	48/18862	0.00987753	0.0615694	0.0471717	IL6/CD74/GATA3/SHH	4
BP	GO:0110151	positive regulation of biomineralization	4/331	48/18862	0.00987753	0.0615694	0.0471717	WNT6/BMP2/NELL1/FBN2	4
BP	GO:1904894	positive regulation of receptor signaling pathway via STAT	4/331	48/18862	0.00987753	0.0615694	0.0471717	IL6/TNF/CYP1B1/TSLP	4
BP	GO:0048562	embryonic organ morphogenesis	11/331	277/18862	0.0100791	0.0627181	0.0480519	GATA3/OTX1/MICAL2/USH1G/SIX2/DLX6/DLX5/USH1C/FOXE1/FBN2/SHH	11
BP	GO:0045598	regulation of fat cell differentiation	7/331	136/18862	0.0102399	0.0631697	0.0483979	IL6/RORC/TNF/GATA3/LMO3/BMP2/ZBTB7C	7
BP	GO:1903305	regulation of regulated secretory pathway	7/331	136/18862	0.0102399	0.0631697	0.0483979	IL13RA2/ITGAM/FCGR2B/SYT12/CCR2/PTAFR/P2RY1	7
BP	GO:0000188	inactivation of MAPK activity	3/331	26/18862	0.0103255	0.0631697	0.0483979	DUSP5/DUSP1/DUSP4	3
BP	GO:0002313	mature B cell differentiation involved in immune response	3/331	26/18862	0.0103255	0.0631697	0.0483979	IL6/GPR183/FCGR2B	3
BP	GO:0009651	response to salt stress	3/331	26/18862	0.0103255	0.0631697	0.0483979	TNF/SLC9A4/AQP1	3
BP	GO:0010894	negative regulation of steroid biosynthetic process	3/331	26/18862	0.0103255	0.0631697	0.0483979	CYP27B1/SNAI1/BMP2	3
BP	GO:0019883	antigen processing and presentation of endogenous antigen	3/331	26/18862	0.0103255	0.0631697	0.0483979	CD74/HLA-DRB1/HLA-DRA	3
BP	GO:0021772	olfactory bulb development	3/331	26/18862	0.0103255	0.0631697	0.0483979	FEZF1/CSF1R/DLX5	3
BP	GO:0042403	thyroid hormone metabolic process	3/331	26/18862	0.0103255	0.0631697	0.0483979	GATA3/SLC5A5/FOXE1	3
BP	GO:0051953	negative regulation of amine transport	3/331	26/18862	0.0103255	0.0631697	0.0483979	ADORA1/P2RY1/ADRA2B	3
BP	GO:0009948	anterior/posterior axis specification	4/331	49/18862	0.0106102	0.0645852	0.0494823	OTX2/SIX2/GPC3/SHH	4
BP	GO:0021879	forebrain neuron differentiation	4/331	49/18862	0.0106102	0.0645852	0.0494823	CSF1R/INHBA/DLX5/NDNF	4
BP	GO:0071622	regulation of granulocyte chemotaxis	4/331	49/18862	0.0106102	0.0645852	0.0494823	C5AR2/CD74/CSF1R/DPP4	4
CC	GO:0042613	MHC class II protein complex	8/338	16/19520	8.48886e-11	2.60608e-08	2.13562e-08	HLA-DQA1/HLA-DQB1/HLA-DPA1/CD74/HLA-DRB5/HLA-DRB1/HLA-DRA/HLA-DMB	8
CC	GO:0042611	MHC protein complex	8/338	25/19520	6.22625e-09	9.55729e-07	7.83196e-07	HLA-DQA1/HLA-DQB1/HLA-DPA1/CD74/HLA-DRB5/HLA-DRB1/HLA-DRA/HLA-DMB	8
CC	GO:0071556	integral component of lumenal side of endoplasmic reticulum membrane	7/338	29/19520	4.93324e-07	3.78626e-05	3.10275e-05	HLA-DQA1/HLA-DQB1/HLA-DPA1/CD74/HLA-DRB5/HLA-DRB1/HLA-DRA	7
CC	GO:0098553	lumenal side of endoplasmic reticulum membrane	7/338	29/19520	4.93324e-07	3.78626e-05	3.10275e-05	HLA-DQA1/HLA-DQB1/HLA-DPA1/CD74/HLA-DRB5/HLA-DRB1/HLA-DRA	7
CC	GO:0098576	lumenal side of membrane	7/338	36/19520	2.37754e-06	0.000145981	0.000119628	HLA-DQA1/HLA-DQB1/HLA-DPA1/CD74/HLA-DRB5/HLA-DRB1/HLA-DRA	7
CC	GO:0030669	clathrin-coated endocytic vesicle membrane	7/338	39/19520	4.18968e-06	0.000214372	0.000175672	HLA-DQA1/HLA-DQB1/HLA-DPA1/CD74/HLA-DRB5/HLA-DRB1/HLA-DRA	7
CC	GO:0044305	calyx of Held	5/338	16/19520	5.64277e-06	0.000231672	0.000189849	CPLX2/KCNK2/KCNA3/ADORA1/CALB1	5
CC	GO:0030665	clathrin-coated vesicle membrane	11/338	117/19520	6.03704e-06	0.000231672	0.000189849	EREG/HLA-DQA1/HLA-DQB1/HLA-DPA1/CD74/HLA-DRB5/HLA-DRB1/HLA-DRA/AREG/ADCY8/RASSF9	11
CC	GO:0012507	ER to Golgi transport vesicle membrane	8/338	62/19520	1.11468e-05	0.000380228	0.000311588	HLA-DQA1/HLA-DQB1/HLA-DPA1/CD74/HLA-DRB5/HLA-DRB1/HLA-DRA/AREG	8
CC	GO:0009897	external side of plasma membrane	20/338	402/19520	2.59693e-05	0.000797258	0.000653333	FCGR3A/TNF/IL13RA2/CD163/FGA/ITGB6/FGG/TLR8/CD74/HLA-DRB1/ITGAM/FCGR2B/FCN1/CSF2RA/IL1RL1/CD80/NT5E/CXCL10/CCR2/CCR1	20
CC	GO:0045334	clathrin-coated endocytic vesicle	7/338	57/19520	5.51477e-05	0.00153912	0.00126127	HLA-DQA1/HLA-DQB1/HLA-DPA1/CD74/HLA-DRB5/HLA-DRB1/HLA-DRA	7
CC	GO:0030667	secretory granule membrane	16/338	305/19520	9.01187e-05	0.00230554	0.00188933	CYBB/LILRB2/VNN1/MOXD1/ALDH3B1/ITGB3/GPR84/ITGAM/FCGR2A/FPR2/OLR1/SIRPB1/FPR1/TNFRSF1B/PTAFR/CCDC136	16
CC	GO:0070820	tertiary granule	11/338	164/19520	0.000138988	0.00328225	0.00268972	CYBB/LILRB2/PPBP/CDA/GPR84/ITGAM/FPR2/OLR1/FPR1/LYZ/PTAFR	11
CC	GO:0098686	hippocampal mossy fiber to CA3 synapse	5/338	30/19520	0.00015085	0.00330793	0.00271077	EPHA7/SYT12/SLC30A3/CALB1/ADCY8	5
CC	GO:0043679	axon terminus	9/338	114/19520	0.000165557	0.00338839	0.0027767	CPLX2/KCNK2/ROR1/KCNA3/ADORA1/SNCG/NTS/CALB1/NTRK2	9
CC	GO:0005774	vacuolar membrane	19/338	431/19520	0.000201227	0.00386103	0.00316402	HLA-DQA1/HLA-DQB1/HLA-DPA1/VNN1/TLR8/TASL/CD74/HLA-DRB5/HLA-DRB1/SLC9A4/TMEM150B/HLA-DRA/VASN/SLC30A3/HLA-DMB/FPR1/TLR7/DPP4/PLEKHF1	19
CC	GO:0030134	COPII-coated ER to Golgi transport vesicle	8/338	94/19520	0.000227271	0.00410424	0.00336333	HLA-DQA1/HLA-DQB1/HLA-DPA1/CD74/HLA-DRB5/HLA-DRB1/HLA-DRA/AREG	8
CC	GO:0030658	transport vesicle membrane	12/338	206/19520	0.000262469	0.00433576	0.00355304	HLA-DQA1/HLA-DQB1/HLA-DPA1/CD74/HLA-DRB5/HLA-DRB1/HLA-DRA/SYT12/SLC30A3/AREG/RAB3B/RASSF9	12
CC	GO:0070821	tertiary granule membrane	7/338	73/19520	0.000268337	0.00433576	0.00355304	CYBB/LILRB2/GPR84/ITGAM/FPR2/OLR1/PTAFR	7
CC	GO:0005765	lysosomal membrane	17/338	378/19520	0.000343436	0.00479556	0.00392984	HLA-DQA1/HLA-DQB1/HLA-DPA1/VNN1/TLR8/TASL/CD74/HLA-DRB5/HLA-DRB1/HLA-DRA/VASN/SLC30A3/HLA-DMB/FPR1/TLR7/DPP4/PLEKHF1	17
CC	GO:0098852	lytic vacuole membrane	17/338	378/19520	0.000343436	0.00479556	0.00392984	HLA-DQA1/HLA-DQB1/HLA-DPA1/VNN1/TLR8/TASL/CD74/HLA-DRB5/HLA-DRB1/HLA-DRA/VASN/SLC30A3/HLA-DMB/FPR1/TLR7/DPP4/PLEKHF1	17
CC	GO:0030662	coated vesicle membrane	11/338	182/19520	0.000343656	0.00479556	0.00392984	EREG/HLA-DQA1/HLA-DQB1/HLA-DPA1/CD74/HLA-DRB5/HLA-DRB1/HLA-DRA/AREG/ADCY8/RASSF9	11
CC	GO:0044306	neuron projection terminus	9/338	130/19520	0.000441925	0.00589873	0.00483387	CPLX2/KCNK2/ROR1/KCNA3/ADORA1/SNCG/NTS/CALB1/NTRK2	9
CC	GO:0030136	clathrin-coated vesicle	11/338	192/19520	0.000540187	0.00690989	0.00566249	EREG/HLA-DQA1/HLA-DQB1/HLA-DPA1/CD74/HLA-DRB5/HLA-DRB1/HLA-DRA/AREG/ADCY8/RASSF9	11
CC	GO:0030666	endocytic vesicle membrane	10/338	163/19520	0.000563948	0.00692528	0.00567509	HLA-DQA1/HLA-DQB1/CYBB/HLA-DPA1/CD163/WNT6/CD74/HLA-DRB5/HLA-DRB1/HLA-DRA	10
CC	GO:0030133	transport vesicle	17/338	402/19520	0.000688521	0.00812985	0.00666221	HLA-DQA1/HLA-DQB1/HLA-DPA1/CD74/HLA-DRB5/HLA-DRB1/HLA-DRA/SYT12/NTS/DDC/SLC30A3/AREG/PCSK2/HAP1/SYTL5/RAB3B/RASSF9	17
CC	GO:0031091	platelet alpha granule	7/338	91/19520	0.00102297	0.0108355	0.00887944	FN1/PPBP/FGA/VEGFC/FGG/ITGB3/SRGN	7
CC	GO:0035579	specific granule membrane	7/338	91/19520	0.00102297	0.0108355	0.00887944	CYBB/ALDH3B1/GPR84/ITGAM/FPR2/OLR1/TNFRSF1B	7
CC	GO:0001533	cornified envelope	5/338	45/19520	0.00104609	0.0108355	0.00887944	CST6/SPRR1A/SPRR2F/SPRR3/RPTN	5
CC	GO:0031093	platelet alpha granule lumen	6/338	67/19520	0.00105885	0.0108355	0.00887944	FN1/PPBP/FGA/VEGFC/FGG/SRGN	6
CC	GO:0032588	trans-Golgi network membrane	7/338	95/19520	0.00131701	0.0130427	0.0106881	HLA-DQA1/HLA-DQB1/HLA-DPA1/CD74/HLA-DRB5/HLA-DRB1/HLA-DRA	7
CC	GO:0005882	intermediate filament	11/338	215/19520	0.00136416	0.0130874	0.0107248	KRT13/KRT33A/KRT7/KRT40/HLA-DRB1/KRT24/KRT31/KRT20/KRT81/KRT74/KRT77	11
CC	GO:0098793	presynapse	18/338	487/19520	0.00219984	0.0204652	0.0167707	CPLX2/KCNK2/ROR1/KCNA3/ADORA1/SYT12/SNCG/NTS/DDC/SLC30A3/P2RY1/CALB1/HAP1/RAB6B/GABRA5/ADCY8/RAB3B/NTRK2	18
CC	GO:0036020	endolysosome membrane	3/338	16/19520	0.00243735	0.0220079	0.0180349	TLR8/TASL/TLR7	3
CC	GO:0099056	integral component of presynaptic membrane	5/338	56/19520	0.00280182	0.0240936	0.0197441	KCNA3/ADORA1/P2RY1/GABRA5/ADCY8	5
CC	GO:0030139	endocytic vesicle	13/338	307/19520	0.00282578	0.0240936	0.0197441	HLA-DQA1/HLA-DQB1/CYBB/HLA-DPA1/CD163/WNT6/SAA1/CD74/HLA-DRB5/HLA-DRB1/HLA-DRA/TLR7/DPP4	13
CC	GO:0031225	anchored component of membrane	9/338	170/19520	0.00290379	0.0240936	0.0197441	CPM/NRN1/VNN1/SMPDL3B/GPC6/NT5E/RGMA/GPC3/RAB3B	9
CC	GO:0098636	protein complex involved in cell adhesion	4/338	36/19520	0.00336021	0.0271469	0.0222462	ITGB6/ITGB3/ITGAM/CD80	4
CC	GO:0043025	neuronal cell body	17/338	474/19520	0.00391248	0.0307983	0.0252384	CPLX2/TUBB4A/CYBB/KCNK2/CAMK2N1/ADORA1/EPHA7/SNCG/L1CAM/DDC/TNFRSF1B/AKAP12/CCR2/PCSK2/CALB1/GABRA5/ADCY8	17
CC	GO:0034774	secretory granule lumen	13/338	322/19520	0.0042284	0.032453	0.0265944	FN1/RNASE2/PPBP/FGA/VEGFC/FGG/C3/MNDA/CDA/FCN1/SRGN/LYZ/POMC	13
CC	GO:0150034	distal axon	12/338	287/19520	0.00447311	0.0334937	0.0274473	CPLX2/KCNK2/ROR1/KCNA3/ADORA1/OTX2/SNCG/L1CAM/NTS/CALB1/HAP1/NTRK2	12
CC	GO:0060205	cytoplasmic vesicle lumen	13/338	326/19520	0.00468468	0.0342428	0.0280611	FN1/RNASE2/PPBP/FGA/VEGFC/FGG/C3/MNDA/CDA/FCN1/SRGN/LYZ/POMC	13
CC	GO:0031983	vesicle lumen	13/338	328/19520	0.00492724	0.0348851	0.0285875	FN1/RNASE2/PPBP/FGA/VEGFC/FGG/C3/MNDA/CDA/FCN1/SRGN/LYZ/POMC	13
CC	GO:0098889	intrinsic component of presynaptic membrane	5/338	64/19520	0.00499982	0.0348851	0.0285875	KCNA3/ADORA1/P2RY1/GABRA5/ADCY8	5
CC	GO:0045111	intermediate filament cytoskeleton	11/338	256/19520	0.00521527	0.0355797	0.0291567	KRT13/KRT33A/KRT7/KRT40/HLA-DRB1/KRT24/KRT31/KRT20/KRT81/KRT74/KRT77	11
CC	GO:0098685	Schaffer collateral - CA1 synapse	5/338	67/19520	0.00607315	0.0405316	0.0332147	SRGN/EPHA7/AKAP12/ADCY8/LRRC4	5
CC	GO:0042581	specific granule	8/338	160/19520	0.00684409	0.0445216	0.0364843	CYBB/ALDH3B1/GPR84/ITGAM/FPR2/OLR1/LYZ/TNFRSF1B	8
CC	GO:0099699	integral component of synaptic membrane	7/338	128/19520	0.00696103	0.0445216	0.0364843	KCNA3/ADORA1/EPHA7/P2RY1/GABRA5/ADCY8/LRRC4	7
CC	GO:0062023	collagen-containing extracellular matrix	15/338	423/19520	0.00721478	0.0450778	0.0369402	EMILIN3/FN1/FGA/FGG/TGM2/FCN1/ADAMTSL4/L1CAM/GPC6/C1QA/SEMA3B/FREM2/GPC3/FBN2/SHH	15
CC	GO:0005788	endoplasmic reticulum lumen	12/338	306/19520	0.00734166	0.0450778	0.0369402	IL6/FN1/WNT6/FGA/FGG/C3/ADAMTSL4/ARSL/CES1/COLGALT2/GPC3/SHH	12
CC	GO:0036019	endolysosome	3/338	24/19520	0.00795352	0.0478771	0.0392341	TLR8/TASL/TLR7	3
MF	GO:0048018	receptor ligand activity	35/328	486/18337	2.56752e-12	1.00677e-09	8.48957e-10	CSF2/EREG/GAST/IL6/CCL2/CCL7/OSM/TNF/WNT6/PPBP/VEGFC/CSF3/COLEC10/CXCL5/CXCL11/IL32/EPHA7/NTS/IL1B/AREG/BMP2/SEMA3B/TSLP/INHBA/MIA/CXCL10/CCL8/DPP4/IL1A/OSGIN1/SEMA6D/FGF12/POMC/SHH/ARTN	35
MF	GO:0030546	signaling receptor activator activity	35/328	492/18337	3.64113e-12	1.00677e-09	8.48957e-10	CSF2/EREG/GAST/IL6/CCL2/CCL7/OSM/TNF/WNT6/PPBP/VEGFC/CSF3/COLEC10/CXCL5/CXCL11/IL32/EPHA7/NTS/IL1B/AREG/BMP2/SEMA3B/TSLP/INHBA/MIA/CXCL10/CCL8/DPP4/IL1A/OSGIN1/SEMA6D/FGF12/POMC/SHH/ARTN	35
MF	GO:0140375	immune receptor activity	17/328	136/18337	3.50124e-10	6.45396e-08	5.44228e-08	HLA-DQA1/HLA-DQB1/HLA-DPA1/LILRB2/IL13RA2/C5AR2/CD74/HLA-DRB1/HLA-DRA/FCGR2B/CSF2RA/FPR2/IL1RL1/FPR3/FPR1/CCR2/CCR1	17
MF	GO:0005125	cytokine activity	20/328	235/18337	9.19449e-09	1.27114e-06	1.07188e-06	CSF2/IL6/CCL2/CCL7/OSM/TNF/WNT6/PPBP/CSF3/CXCL5/CXCL11/IL32/IL1B/AREG/BMP2/TSLP/INHBA/CXCL10/CCL8/IL1A	20
MF	GO:0004497	monooxygenase activity	13/328	101/18337	3.00676e-08	3.32548e-06	2.8042e-06	CYP27B1/MOXD1/AKR1C4/CYP1B1/CYP2C18/MICAL2/CYP24A1/NOS2/CYP2A6/AKR1C2/CYP4F3/CYP26A1/CYP4F11	13
MF	GO:0001664	G protein-coupled receptor binding	20/328	289/18337	2.81821e-07	2.59745e-05	2.1903e-05	CCL2/CCL7/WNT6/PPBP/SAA1/C3/RSPO3/NECAB2/CXCL5/ADORA1/FCN1/CXCL11/NTS/FPR1/CXCL10/CCR2/CCL8/P2RY1/POMC/MRAP2	20
MF	GO:0032395	MHC class II receptor activity	5/328	10/18337	4.1588e-07	3.00874e-05	2.53711e-05	HLA-DQA1/HLA-DQB1/HLA-DPA1/HLA-DRB1/HLA-DRA	5
MF	GO:0005126	cytokine receptor binding	19/328	270/18337	4.3526e-07	3.00874e-05	2.53711e-05	CSF2/IL6/CCL2/CCL7/OSM/TNF/PPBP/VEGFC/ITGB3/GATA3/CSF3/CXCL5/CXCL11/IL1B/TSLP/CXCL10/CCR2/CCL8/IL1A	19
MF	GO:0008083	growth factor activity	14/328	162/18337	1.32821e-06	8.16111e-05	6.88183e-05	CSF2/EREG/IL6/OSM/PPBP/VEGFC/CSF3/AREG/BMP2/INHBA/MIA/OSGIN1/FGF12/ARTN	14
MF	GO:0016709	oxidoreductase activity, acting on paired donors, with incorporation or reduction of molecular oxygen, NAD(P)H as one donor, and incorporation of one atom of oxygen	8/328	48/18337	1.94776e-06	0.000107711	9.08272e-05	CYP27B1/AKR1C4/MICAL2/NOS2/AKR1C2/CYP4F3/CYP26A1/CYP4F11	8
MF	GO:0016705	oxidoreductase activity, acting on paired donors, with incorporation or reduction of molecular oxygen	13/328	160/18337	6.28049e-06	0.000315738	0.000266245	CYP27B1/MOXD1/AKR1C4/CYP1B1/CYP2C18/MICAL2/CYP24A1/NOS2/CYP2A6/AKR1C2/CYP4F3/CYP26A1/CYP4F11	13
MF	GO:0070851	growth factor receptor binding	12/328	141/18337	8.896e-06	0.000409957	0.000345696	CSF2/EREG/IL6/VEGFC/ITGB3/GATA3/CSF3/IL1B/AREG/TSLP/IL1A/ARTN	12
MF	GO:0042605	peptide antigen binding	6/328	32/18337	1.91501e-05	0.000814618	0.000686924	HLA-DQA1/HLA-DQB1/HLA-DPA1/HLA-DRB5/HLA-DRB1/HLA-DRA	6
MF	GO:0008009	chemokine activity	7/328	49/18337	2.47668e-05	0.000978288	0.000824938	CCL2/CCL7/PPBP/CXCL5/CXCL11/CXCL10/CCL8	7
MF	GO:0008106	alcohol dehydrogenase (NADP+) activity	5/328	21/18337	2.85576e-05	0.00105282	0.000887791	AKR1C4/ALDH3A1/RDH12/AKR1C2/AKR1B10	5
MF	GO:0042379	chemokine receptor binding	8/328	69/18337	3.11599e-05	0.00107696	0.000908147	CCL2/CCL7/PPBP/CXCL5/CXCL11/CXCL10/CCR2/CCL8	8
MF	GO:0020037	heme binding	11/328	140/18337	4.4233e-05	0.00136469	0.00115077	CYP27B1/CYBB/CYP1B1/CYP2C18/CYP24A1/NOS2/CYP2A6/STEAP4/CYP4F3/CYP26A1/CYP4F11	11
MF	GO:0004875	complement receptor activity	4/328	12/18337	4.44203e-05	0.00136469	0.00115077	C5AR2/FPR2/FPR3/FPR1	4
MF	GO:0046906	tetrapyrrole binding	11/328	150/18337	8.29181e-05	0.00237179	0.002	CYP27B1/CYBB/CYP1B1/CYP2C18/CYP24A1/NOS2/CYP2A6/STEAP4/CYP4F3/CYP26A1/CYP4F11	11
MF	GO:0023023	MHC protein complex binding	5/328	26/18337	8.57789e-05	0.00237179	0.002	LILRB2/CD74/HLA-DRB1/HLA-DRA/HLA-DMB	5
MF	GO:0004033	aldo-keto reductase (NADP) activity	5/328	27/18337	0.000103741	0.00273185	0.00230363	AKR1C4/ALDH3A1/RDH12/AKR1C2/AKR1B10	5
MF	GO:0031406	carboxylic acid binding	12/328	184/18337	0.0001229	0.00299468	0.00252525	SIGLEC10/CPS1/FABP4/AKR1C4/FCN1/GSTA1/NOS2/DDC/UGT1A7/AKR1C2/CYP26A1/CYP4F11	12
MF	GO:0016903	oxidoreductase activity, acting on the aldehyde or oxo group of donors	6/328	44/18337	0.000124553	0.00299468	0.00252525	AKR1C4/ALDH3B1/ALDH3A1/ADH7/AKR1B10/ALDH8A1	6
MF	GO:0019955	cytokine binding	10/328	136/18337	0.000169886	0.00391445	0.00330085	IL13RA2/ITGB3/CD74/CSF2RA/IL1RL1/VASN/CSF1R/TNFRSF1B/CCR2/CCR1	10
MF	GO:0042277	peptide binding	16/328	315/18337	0.000187737	0.00415275	0.0035018	GSTM1/HLA-DQA1/HLA-DQB1/HLA-DPA1/LILRB2/CD74/HLA-DRB5/HLA-DRB1/ITGAM/HLA-DRA/FCGR2B/FPR2/C1QA/INHBA/FBXO2/GSTM3	16
MF	GO:0023026	MHC class II protein complex binding	4/328	17/18337	0.000198979	0.00417653	0.00352185	CD74/HLA-DRB1/HLA-DRA/HLA-DMB	4
MF	GO:0015026	coreceptor activity	6/328	48/18337	0.000203918	0.00417653	0.00352185	ROR1/ITGB3/GPR15/GPC6/CD80/RGMA	6
MF	GO:0045236	CXCR chemokine receptor binding	4/328	18/18337	0.00025224	0.00498173	0.00420083	PPBP/CXCL5/CXCL11/CXCL10	4
MF	GO:0033293	monocarboxylic acid binding	7/328	71/18337	0.000274066	0.00522615	0.00440694	FABP4/AKR1C4/GSTA1/UGT1A7/AKR1C2/CYP26A1/CYP4F11	7
MF	GO:0016616	oxidoreductase activity, acting on the CH-OH group of donors, NAD or NADP as acceptor	9/328	120/18337	0.000308562	0.00568784	0.00479625	ADH1C/AKR1C4/DHRS2/ALDH3A1/BMP2/RDH12/AKR1C2/ADH7/AKR1B10	9
MF	GO:0016712	oxidoreductase activity, acting on paired donors, with incorporation or reduction of molecular oxygen, reduced flavin or flavoprotein as one donor, and incorporation of one atom of oxygen	5/328	35/18337	0.000371056	0.00650625	0.00548638	CYP1B1/CYP2C18/CYP2A6/CYP4F3/CYP4F11	5
MF	GO:0004745	retinol dehydrogenase activity	4/328	20/18337	0.000388258	0.00650625	0.00548638	ADH1C/BMP2/RDH12/ADH7	4
MF	GO:0008391	arachidonic acid monooxygenase activity	4/328	20/18337	0.000388258	0.00650625	0.00548638	CYP2C18/CYP2A6/CYP4F3/CYP4F11	4
MF	GO:0001618	virus receptor activity	7/328	76/18337	0.000417536	0.0067095	0.00565777	ITGB6/ITGB3/GPR15/CD80/SELPLG/CLDN6/DPP4	7
MF	GO:0016620	oxidoreductase activity, acting on the aldehyde or oxo group of donors, NAD or NADP as acceptor	5/328	36/18337	0.000424652	0.0067095	0.00565777	AKR1C4/ALDH3B1/ALDH3A1/AKR1B10/ALDH8A1	5
MF	GO:0140272	exogenous protein binding	7/328	77/18337	0.000452361	0.00694876	0.00585953	ITGB6/ITGB3/GPR15/CD80/SELPLG/CLDN6/DPP4	7
MF	GO:0016614	oxidoreductase activity, acting on CH-OH group of donors	9/328	130/18337	0.000556208	0.00831305	0.00700996	ADH1C/AKR1C4/DHRS2/ALDH3A1/BMP2/RDH12/AKR1C2/ADH7/AKR1B10	9
MF	GO:0008330	protein tyrosine/threonine phosphatase activity	3/328	10/18337	0.000619903	0.00902122	0.00760712	DUSP5/DUSP1/DUSP4	3
MF	GO:0038187	pattern recognition receptor activity	4/328	23/18337	0.00068021	0.00964503	0.00813314	TLR8/FCN1/PTAFR/TLR7	4
MF	GO:0008201	heparin binding	10/328	164/18337	0.000755922	0.0103329	0.00871316	FN1/CCL7/SAA1/MMP7/RSPO3/CXCL11/CXCL10/NELL1/NDNF/CCL8	10
MF	GO:0001540	amyloid-beta binding	7/328	84/18337	0.000766089	0.0103329	0.00871316	LILRB2/CD74/ITGAM/FCGR2B/FPR2/C1QA/FBXO2	7
MF	GO:0019864	IgG binding	3/328	11/18337	0.000841103	0.0108408	0.00914149	FCGR3A/FCGR2B/FCGR2A	3
MF	GO:1901681	sulfur compound binding	13/328	260/18337	0.000856361	0.0108408	0.00914149	GSTM1/FN1/CCL7/SAA1/TKTL1/MMP7/RSPO3/CXCL11/CXCL10/NELL1/NDNF/CCL8/GSTM3	13
MF	GO:0005539	glycosaminoglycan binding	12/328	228/18337	0.000862561	0.0108408	0.00914149	FN1/CCL7/SAA1/MMP7/RSPO3/NLRP3/CXCL11/CXCL10/NELL1/NDNF/CCL8/SHH	12
MF	GO:0070330	aromatase activity	4/328	25/18337	0.000944747	0.0116099	0.00979001	CYP1B1/CYP2C18/CYP4F3/CYP4F11	4
MF	GO:0004032	alditol:NADP+ 1-oxidoreductase activity	3/328	12/18337	0.00110666	0.013304	0.0112186	AKR1C4/AKR1C2/AKR1B10	3
MF	GO:0045499	chemorepellent activity	4/328	27/18337	0.00127435	0.0149939	0.0126436	EPHA7/SEMA3B/DPP4/SEMA6D	4
MF	GO:0017017	MAP kinase tyrosine/serine/threonine phosphatase activity	3/328	13/18337	0.00141968	0.016356	0.0137921	DUSP5/DUSP1/DUSP4	3
MF	GO:0005506	iron ion binding	9/328	150/18337	0.00153714	0.0173477	0.0146284	CYP27B1/ALOX15/CYP1B1/CYP2C18/CYP24A1/CYP2A6/CYP4F3/CYP26A1/CYP4F11	9
MF	GO:0033218	amide binding	16/328	391/18337	0.001907	0.0210914	0.0177853	GSTM1/HLA-DQA1/HLA-DQB1/HLA-DPA1/LILRB2/CD74/HLA-DRB5/HLA-DRB1/ITGAM/HLA-DRA/FCGR2B/FPR2/C1QA/INHBA/FBXO2/GSTM3	16
MF	GO:0033549	MAP kinase phosphatase activity	3/328	15/18337	0.00219947	0.0238492	0.0201108	DUSP5/DUSP1/DUSP4	3
MF	GO:0051019	mitogen-activated protein kinase binding	4/328	32/18337	0.00243421	0.0258869	0.021829	DUSP5/DUSP1/DUSP4/PTAFR	4
MF	GO:0002020	protease binding	8/328	131/18337	0.0024832	0.0259096	0.0218482	CCBE1/FN1/TNF/ITGB3/ADAMTSL4/CARD18/DPP4/NTRK2	8

## Sheet: KEGG
Table S2. GO terms and KEGG pathway analysis on the yellow and tuquorise modules
ID	Description	GeneRatio	BgRatio	pvalue	p.adjust	qvalue	geneID	Count
hsa05150	Staphylococcus aureus infection	26/178	96/8113	6.47285e-22	1.55348e-19	1.20599e-19	KRT13/HLA-DQA1/HLA-DQB1/FCGR3A/KRT33A/HLA-DPA1/FGG/C3/KRT40/HLA-DRB5/HLA-DRB1/ITGAM/HLA-DRA/FCGR2B/KRT24/FCGR2A/KRT31/FPR2/FPR3/C1QA/CFB/KRT20/HLA-DMB/FPR1/SELPLG/PTAFR	26
hsa05140	Leishmaniasis	16/178	77/8113	6.25224e-12	7.50269e-10	5.82445e-10	HLA-DQA1/HLA-DQB1/FCGR3A/CYBB/HLA-DPA1/TNF/C3/HLA-DRB5/HLA-DRB1/ITGAM/HLA-DRA/FCGR2A/IL1B/NOS2/HLA-DMB/IL1A	16
hsa04640	Hematopoietic cell lineage	17/178	99/8113	3.39596e-11	2.71677e-09	2.10907e-09	CSF2/HLA-DQA1/IL6/HLA-DQB1/HLA-DPA1/TNF/ITGB3/HLA-DRB5/HLA-DRB1/CSF3/ITGAM/HLA-DRA/CSF2RA/CSF1R/IL1B/HLA-DMB/IL1A	17
hsa05332	Graft-versus-host disease	12/178	42/8113	5.35395e-11	3.21237e-09	2.49381e-09	HLA-DQA1/IL6/HLA-DQB1/HLA-DPA1/TNF/HLA-DRB5/HLA-DRB1/HLA-DRA/CD80/IL1B/HLA-DMB/IL1A	12
hsa05321	Inflammatory bowel disease	13/178	65/8113	1.06994e-09	4.46269e-08	3.46446e-08	HLA-DQA1/IL6/HLA-DQB1/RORC/HLA-DPA1/TNF/HLA-DRB5/GATA3/HLA-DRB1/HLA-DRA/IL1B/HLA-DMB/IL1A	13
hsa05323	Rheumatoid arthritis	15/178	93/8113	1.28014e-09	4.46269e-08	3.46446e-08	CSF2/HLA-DQA1/IL6/HLA-DQB1/CCL2/HLA-DPA1/TNF/HLA-DRB5/HLA-DRB1/HLA-DRA/CXCL5/CD80/IL1B/HLA-DMB/IL1A	15
hsa04940	Type I diabetes mellitus	11/178	43/8113	1.30162e-09	4.46269e-08	3.46446e-08	HLA-DQA1/HLA-DQB1/HLA-DPA1/TNF/HLA-DRB5/HLA-DRB1/HLA-DRA/CD80/IL1B/HLA-DMB/IL1A	11
hsa04060	Cytokine-cytokine receptor interaction	25/178	295/8113	5.02464e-09	1.50739e-07	1.17021e-07	CSF2/IL6/CCL2/CCL7/OSM/TNF/IL13RA2/PPBP/CSF3/CXCL5/CXCL11/CSF2RA/IL32/IL1RL1/CSF1R/IL1B/BMP2/TSLP/INHBA/CXCL10/TNFRSF1B/CCR2/CCR1/CCL8/IL1A	25
hsa05152	Tuberculosis	19/178	180/8113	1.185e-08	3.15999e-07	2.45315e-07	HLA-DQA1/IL6/CYP27B1/HLA-DQB1/FCGR3A/HLA-DPA1/TNF/C3/CD74/HLA-DRB5/HLA-DRB1/ITGAM/HLA-DRA/FCGR2B/FCGR2A/IL1B/NOS2/HLA-DMB/IL1A	19
hsa04145	Phagosome	17/178	152/8113	3.06947e-08	7.36672e-07	5.7189e-07	HLA-DQA1/TUBB4A/HLA-DQB1/FCGR3A/CYBB/HLA-DPA1/C3/ITGB3/HLA-DRB5/HLA-DRB1/ITGAM/HLA-DRA/FCGR2B/COLEC11/FCGR2A/OLR1/HLA-DMB	17
hsa05330	Allograft rejection	9/178	38/8113	9.07179e-08	1.9793e-06	1.53656e-06	HLA-DQA1/HLA-DQB1/HLA-DPA1/TNF/HLA-DRB5/HLA-DRB1/HLA-DRA/CD80/HLA-DMB	9
hsa04514	Cell adhesion molecules	16/178	149/8113	1.41641e-07	2.83281e-06	2.19916e-06	HLA-DQA1/HLA-DQB1/HLA-DPA1/HLA-DRB5/HLA-DRB1/ITGAM/HLA-DRA/NRXN3/L1CAM/CD80/HLA-DMB/SIGLEC1/SELPLG/CLDN6/LRRC4/CLDN20	16
hsa05310	Asthma	8/178	31/8113	2.35182e-07	4.0695e-06	3.15922e-06	HLA-DQA1/HLA-DQB1/HLA-DPA1/TNF/HLA-DRB5/HLA-DRB1/HLA-DRA/HLA-DMB	8
hsa04061	Viral protein interaction with cytokine and cytokine receptor	13/178	100/8113	2.37388e-07	4.0695e-06	3.15922e-06	IL6/CCL2/CCL7/TNF/PPBP/CXCL5/CXCL11/CSF1R/CXCL10/TNFRSF1B/CCR2/CCR1/CCL8	13
hsa00980	Metabolism of xenobiotics by cytochrome P450	11/178	78/8113	9.03799e-07	1.39327e-05	1.08162e-05	GSTM1/ADH1C/ALDH3B1/CYP1B1/UGT1A10/GSTA1/CYP2A6/ALDH3A1/UGT1A7/GSTM3/ADH7	11
hsa04672	Intestinal immune network for IgA production	9/178	49/8113	9.28847e-07	1.39327e-05	1.08162e-05	HLA-DQA1/IL6/HLA-DQB1/HLA-DPA1/HLA-DRB5/HLA-DRB1/HLA-DRA/CD80/HLA-DMB	9
hsa05322	Systemic lupus erythematosus	14/178	136/8113	1.48106e-06	2.0909e-05	1.6232e-05	HLA-DQA1/HLA-DQB1/FCGR3A/HLA-DPA1/TNF/C3/HLA-DRB5/HLA-DRB1/H3C7/HLA-DRA/FCGR2A/C1QA/CD80/HLA-DMB	14
hsa00982	Drug metabolism - cytochrome P450	10/178	72/8113	3.31807e-06	4.4241e-05	3.4345e-05	GSTM1/ADH1C/ALDH3B1/UGT1A10/GSTA1/CYP2A6/ALDH3A1/UGT1A7/GSTM3/ADH7	10
hsa05164	Influenza A	15/178	171/8113	4.68706e-06	5.9205e-05	4.59618e-05	HLA-DQA1/IL6/HLA-DQB1/CCL2/HLA-DPA1/TNF/HLA-DRB5/NLRP3/HLA-DRB1/HLA-DRA/IL1B/HLA-DMB/CXCL10/TLR7/IL1A	15
hsa05133	Pertussis	10/178	76/8113	5.47543e-06	6.57052e-05	5.1008e-05	IL6/TNF/C3/NLRP3/ITGAM/CXCL5/C1QA/IL1B/NOS2/IL1A	10
hsa05171	Coronavirus disease - COVID-19	17/178	232/8113	1.22379e-05	0.000139862	0.000108577	CSF2/IL6/CYBB/CCL2/TNF/FGA/FGG/TLR8/C3/NLRP3/CSF3/FCGR2A/C1QA/IL1B/CFB/CXCL10/TLR7	17
hsa04613	Neutrophil extracellular trap formation	15/178	190/8113	1.68906e-05	0.000175733	0.000136424	FCGR3A/CYBB/FGA/FGG/TLR8/C3/ITGB3/ITGAM/H3C7/FCGR2A/FPR2/FPR3/FPR1/SELPLG/TLR7	15
hsa05320	Autoimmune thyroid disease	8/178	53/8113	1.74998e-05	0.000175733	0.000136424	HLA-DQA1/HLA-DQB1/HLA-DPA1/HLA-DRB5/HLA-DRB1/HLA-DRA/CD80/HLA-DMB	8
hsa05204	Chemical carcinogenesis - DNA adducts	9/178	69/8113	1.75733e-05	0.000175733	0.000136424	GSTM1/CYP1B1/CYP2C18/UGT1A10/GSTA1/CYP2A6/UGT1A7/AKR1C2/GSTM3	9
hsa04659	Th17 cell differentiation	11/178	108/8113	2.26585e-05	0.000217522	0.000168866	HLA-DQA1/IL6/HLA-DQB1/RORC/HLA-DPA1/HLA-DRB5/GATA3/HLA-DRB1/HLA-DRA/IL1B/HLA-DMB	11
hsa04657	IL-17 signaling pathway	10/178	94/8113	3.68863e-05	0.000340489	0.000264327	CSF2/IL6/CCL2/CCL7/TNF/CSF3/CXCL5/MMP13/IL1B/CXCL10	10
hsa05416	Viral myocarditis	8/178	60/8113	4.43243e-05	0.000393993	0.000305863	HLA-DQA1/HLA-DQB1/HLA-DPA1/HLA-DRB5/HLA-DRB1/HLA-DRA/CD80/HLA-DMB	8
hsa04612	Antigen processing and presentation	9/178	78/8113	4.77377e-05	0.00040918	0.000317653	HLA-DQA1/HLA-DQB1/HLA-DPA1/TNF/CD74/HLA-DRB5/HLA-DRB1/HLA-DRA/HLA-DMB	9
hsa04380	Osteoclast differentiation	11/178	128/8113	0.000109337	0.000882376	0.000685003	FCGR3A/TNF/LILRB2/ITGB3/LILRA5/FCGR2B/FCGR2A/CSF1R/IL1B/SIRPB1/IL1A	11
hsa00830	Retinol metabolism	8/178	68/8113	0.000110297	0.000882376	0.000685003	ADH1C/CYP2C18/UGT1A10/CYP2A6/RDH12/UGT1A7/ADH7/CYP26A1	8
hsa00350	Tyrosine metabolism	6/178	36/8113	0.000115533	0.000894449	0.000694375	HPD/ADH1C/ALDH3B1/DDC/ALDH3A1/ADH7	6
hsa00360	Phenylalanine metabolism	4/178	16/8113	0.000331658	0.00248743	0.00193103	HPD/ALDH3B1/DDC/ALDH3A1	4
hsa00983	Drug metabolism - other enzymes	8/178	80/8113	0.000345894	0.00251559	0.00195289	GSTM1/CDA/UGT1A10/GSTA1/CYP2A6/CES1/UGT1A7/GSTM3	8
hsa04668	TNF signaling pathway	9/178	112/8113	0.000759956	0.00521113	0.00404548	CSF2/IL6/CCL2/TNF/VEGFC/CXCL5/IL1B/CXCL10/TNFRSF1B	9
hsa05145	Toxoplasmosis	9/178	112/8113	0.000759956	0.00521113	0.00404548	HLA-DQA1/HLA-DQB1/HLA-DPA1/TNF/HLA-DRB5/HLA-DRB1/HLA-DRA/NOS2/HLA-DMB	9
hsa04658	Th1 and Th2 cell differentiation	8/178	92/8113	0.000888698	0.00592465	0.0045994	HLA-DQA1/HLA-DQB1/HLA-DPA1/HLA-DRB5/GATA3/HLA-DRB1/HLA-DRA/HLA-DMB	8
hsa04933	AGE-RAGE signaling pathway in diabetic complications	8/178	100/8113	0.00153176	0.00993571	0.00771325	IL6/CYBB/FN1/CCL2/TNF/VEGFC/IL1B/IL1A	8
hsa04620	Toll-like receptor signaling pathway	8/178	104/8113	0.00196883	0.0124347	0.00965325	IL6/TNF/TLR8/CXCL11/CD80/IL1B/CXCL10/TLR7	8
hsa04610	Complement and coagulation cascades	7/178	85/8113	0.00254414	0.0156562	0.0121542	FGA/FGG/C3/ITGAM/C1QA/CFB/VSIG4	7
hsa05418	Fluid shear stress and atherosclerosis	9/178	139/8113	0.00342331	0.0203751	0.0158175	GSTM1/DUSP1/CCL2/TNF/ITGB3/GSTA1/IL1B/IL1A/GSTM3	9
hsa05166	Human T-cell leukemia virus 1 infection	12/178	222/8113	0.00348074	0.0203751	0.0158175	CSF2/HLA-DQA1/IL6/HLA-DQB1/HLA-DPA1/TNF/MMP7/HLA-DRB5/HLA-DRB1/HLA-DRA/HLA-DMB/ADCY8	12
hsa01523	Antifolate resistance	4/178	30/8113	0.00393057	0.0224604	0.0174364	IL6/TNF/IL1B/ABCC5	4
hsa05144	Malaria	5/178	50/8113	0.00458178	0.0255727	0.0198525	IL6/CCL2/TNF/CSF3/IL1B	5
hsa05142	Chagas disease	7/178	102/8113	0.00698092	0.0372315	0.0289034	IL6/CCL2/TNF/C3/C1QA/IL1B/NOS2	7
hsa05146	Amoebiasis	7/178	102/8113	0.00698092	0.0372315	0.0289034	CSF2/IL6/FN1/TNF/ITGAM/IL1B/NOS2	7
hsa05134	Legionellosis	5/178	57/8113	0.00800852	0.0417836	0.0324373	IL6/TNF/C3/ITGAM/IL1B	5
hsa04062	Chemokine signaling pathway	10/178	192/8113	0.00955277	0.0487801	0.0378687	CCL2/CCL7/PPBP/CXCL5/CXCL11/CXCL10/CCR2/CCR1/CCL8/ADCY8	10
hsa00140	Steroid hormone biosynthesis	5/178	61/8113	0.0106101	0.0530505	0.0411839	AKR1C4/CYP1B1/UGT1A10/UGT1A7/AKR1C2	5
hsa04915	Estrogen signaling pathway	8/178	138/8113	0.0108362	0.0530751	0.041203	KRT13/KRT33A/KRT40/KRT24/KRT31/KRT20/POMC/ADCY8	8
hsa05169	Epstein-Barr virus infection	10/178	202/8113	0.0133308	0.0639877	0.0496747	HLA-DQA1/IL6/HLA-DQB1/HLA-DPA1/TNF/HLA-DRB5/HLA-DRB1/HLA-DRA/HLA-DMB/CXCL10	10
