# Supplementary material for: A pyroptosis expression pattern score predicts prognosis and immune microenvironment of lung squamous cell carcinoma
Source: Front Genet. 2022 Nov 10;13:996444. doi: 10.3389/fgene.2022.996444 (PMC9685532; doi:10.3389/fgene.2022.996444)
Supplement: Supplementary file 2 [file Table3.XLSX]

## Sheet: Sheet1
Table S3. The coefficients obtained form multivariate Cox analysis.
id	coef
CSF2	0.178741
FGA	0.085643
IRS4	-0.201191
CYP2C18	-0.110365
TSLP	-0.186254
AKAP12	0.144678
