# Supplementary material for: A pyroptosis expression pattern score predicts prognosis and immune microenvironment of lung squamous cell carcinoma
Source: Front Genet. 2022 Nov 10;13:996444. doi: 10.3389/fgene.2022.996444 (PMC9685532; doi:10.3389/fgene.2022.996444)
Supplement: Supplementary file 4 [file Table4.XLSX]

## Sheet: GO
Table S2. GO terms and KEGG pathways analysis of the DEGs between high-PEPScore subgroup and low-PEPScore subgroup
ONTOLOGY	ID	Description	GeneRatio	BgRatio	pvalue	p.adjust	qvalue	geneID	Count
BP	GO:0045229	external encapsulating structure organization	62/672	396/18862	4.16654e-23	1.79953e-19	1.46618e-19	GAS2/CCN1/ADAM19/SMOC1/FN1/KLK7/MMP2/TNF/COL3A1/C6orf15/FGA/HAS1/ITGB6/FGG/ADAMTS5/VTN/ITGB3/TGFBI/ADAMTS16/LOXL2/SERPINE1/MMP7/COMP/COL4A3/COL8A1/ITGA3/MMP3/A2M/ADAMTS4/AGT/ADAMTSL4/MFAP4/COL1A1/COL1A2/TGM3/COL5A3/COL5A1/PRSS1/MMP13/FOXC2/CPB2/FBN2/MMP1/APLP1/TIMP1/KLK5/EMILIN1/PRSS2/MIA/LAMC2/CRISPLD2/TNXB/ADAM8/FAP/MMP28/SLC39A8/ICAM1/ETS1/NDNF/DPP4/MMP19/FGB	62
BP	GO:0030198	extracellular matrix organization	61/672	393/18862	1.51093e-22	2.49025e-19	2.02895e-19	GAS2/CCN1/ADAM19/SMOC1/FN1/KLK7/MMP2/TNF/COL3A1/C6orf15/FGA/HAS1/ITGB6/FGG/ADAMTS5/VTN/ITGB3/TGFBI/ADAMTS16/LOXL2/SERPINE1/MMP7/COMP/COL4A3/COL8A1/ITGA3/MMP3/A2M/ADAMTS4/AGT/ADAMTSL4/MFAP4/COL1A1/COL1A2/COL5A3/COL5A1/PRSS1/MMP13/FOXC2/CPB2/FBN2/MMP1/APLP1/TIMP1/KLK5/EMILIN1/PRSS2/MIA/LAMC2/CRISPLD2/TNXB/ADAM8/FAP/MMP28/SLC39A8/ICAM1/ETS1/NDNF/DPP4/MMP19/FGB	61
BP	GO:0043062	extracellular structure organization	61/672	394/18862	1.72974e-22	2.49025e-19	2.02895e-19	GAS2/CCN1/ADAM19/SMOC1/FN1/KLK7/MMP2/TNF/COL3A1/C6orf15/FGA/HAS1/ITGB6/FGG/ADAMTS5/VTN/ITGB3/TGFBI/ADAMTS16/LOXL2/SERPINE1/MMP7/COMP/COL4A3/COL8A1/ITGA3/MMP3/A2M/ADAMTS4/AGT/ADAMTSL4/MFAP4/COL1A1/COL1A2/COL5A3/COL5A1/PRSS1/MMP13/FOXC2/CPB2/FBN2/MMP1/APLP1/TIMP1/KLK5/EMILIN1/PRSS2/MIA/LAMC2/CRISPLD2/TNXB/ADAM8/FAP/MMP28/SLC39A8/ICAM1/ETS1/NDNF/DPP4/MMP19/FGB	61
BP	GO:0006959	humoral immune response	52/672	380/18862	6.0782e-17	6.56294e-14	5.34722e-14	IGLL1/IGKV1-39/IGHV3-13/LTF/IGKV2D-28/PLA2G2A/KLK7/CCL2/PGC/EBI3/IGHV3-38/TNF/PPBP/FGA/FCER2/C3/VTN/SUSD4/DMBT1/C5AR2/RNASE7/CCL13/CFI/SFTPD/CXCL5/FCN1/CXCL11/A2M/C7/TREM1/IGHV3-53/MFAP4/IGHV3-66/PGLYRP3/PLA2G1B/IGKV1D-39/C4B/CPB2/CXCL13/IGHD/KLK5/CFB/C4BPA/PRSS2/VSIG4/PAX5/CR2/ALOX5/CXCL2/FCN3/FGB/C4A	52
BP	GO:0043588	skin development	48/672	415/18862	6.45301e-13	5.57411e-10	4.54156e-10	AKR1C3/EREG/KRTAP19-1/KRT13/KRT23/CASP14/CYP27B1/FOXE1/FST/KRT33A/SNAI1/TCHH/KRT10/TNF/KRT7/SPRR1A/COL3A1/ITGB6/ERRFI1/SPINK6/SPRR2F/LCE1F/GRHL3/COMP/KRT86/ITGA3/KRT4/KRT24/SPRR3/FGFR2/KRT15/KRT31/COL1A1/COL1A2/TGM3/COL5A3/COL5A1/CSTA/KLK5/RPTN/TFAP2B/KRT20/INHBA/SPRR4/KRT81/SOX21/KRT77/SOSTDC1	48
BP	GO:0002920	regulation of humoral immune response	25/672	138/18862	1.81243e-11	1.30465e-08	1.06298e-08	IGKV1-39/IGHV3-13/IGKV2D-28/KLK7/PGC/TNF/FCER2/C3/VTN/SUSD4/C5AR2/CFI/A2M/C7/IGHV3-53/IGKV1D-39/C4B/CPB2/CXCL13/KLK5/CFB/C4BPA/VSIG4/CR2/C4A	25
BP	GO:0070268	cornification	22/672	113/18862	6.8449e-11	4.2233e-08	3.44098e-08	KRT13/KRT23/CASP14/KRT33A/TCHH/KRT10/KRT7/SPRR1A/SPINK6/SPRR2F/KRT86/KRT4/KRT24/SPRR3/KRT15/KRT31/CSTA/KLK5/RPTN/KRT20/KRT81/KRT77	22
BP	GO:0070372	regulation of ERK1 and ERK2 cascade	36/672	301/18862	2.07538e-10	1.12044e-07	9.12893e-08	ROS1/CCN1/PLA2G2A/FN1/CCL2/CCL7/TNF/FGA/FGG/ERRFI1/AGER/P2RY6/C5AR2/CCL13/CCL23/ARRB1/NECAB2/TIMP3/DUSP4/CAMK2N1/LMO3/PLA2G5/FGFR2/MARCO/EPHA7/THPO/EPHB1/CSF1R/LIF/EMILIN1/AKAP12/CCL22/ICAM1/P2RY1/CCL21/FGB	36
BP	GO:0022617	extracellular matrix disassembly	18/672	81/18862	3.82142e-10	1.83386e-07	1.49415e-07	KLK7/MMP2/ADAMTS5/MMP7/MMP3/A2M/ADAMTS4/PRSS1/MMP13/MMP1/TIMP1/KLK5/PRSS2/ADAM8/FAP/ETS1/DPP4/MMP19	18
BP	GO:0006956	complement activation	26/672	178/18862	9.90924e-10	4.2798e-07	3.48701e-07	IGLL1/IGKV1-39/IGHV3-13/IGKV2D-28/IGHV3-38/C3/VTN/SUSD4/C5AR2/CFI/FCN1/A2M/C7/IGHV3-53/MFAP4/IGHV3-66/IGKV1D-39/C4B/CPB2/IGHD/CFB/C4BPA/VSIG4/CR2/FCN3/C4A	26
BP	GO:0070371	ERK1 and ERK2 cascade	36/672	320/18862	1.13593e-09	4.46008e-07	3.63389e-07	ROS1/CCN1/PLA2G2A/FN1/CCL2/CCL7/TNF/FGA/FGG/ERRFI1/AGER/P2RY6/C5AR2/CCL13/CCL23/ARRB1/NECAB2/TIMP3/DUSP4/CAMK2N1/LMO3/PLA2G5/FGFR2/MARCO/EPHA7/THPO/EPHB1/CSF1R/LIF/EMILIN1/AKAP12/CCL22/ICAM1/P2RY1/CCL21/FGB	36
BP	GO:0030595	leukocyte chemotaxis	29/672	226/18862	2.3928e-09	8.61207e-07	7.01677e-07	PADI2/S1PR1/C10orf99/CCL2/CCL7/PPBP/VEGFC/SAA1/C5AR2/CCL13/SERPINE1/CCL23/CSF3R/DPEP1/SFTPD/CXCL5/CXCL11/PLA2G1B/CXCL13/CSF1R/ADAM8/MMP28/CCL22/DPP4/ALOX5/TNFSF18/LBP/CXCL2/CCL21	29
BP	GO:0010466	negative regulation of peptidase activity	31/672	257/18862	3.08455e-09	1.02478e-06	8.34951e-07	SERPIND1/SERPINB2/LTF/CST6/FETUB/SPINK1/TNF/AMBP/NLRP7/C3/VTN/CST2/SPINK6/SERPINE1/COL4A3/TIMP3/DPEP1/SERPINB12/A2M/AGT/SERPINB11/TFPI2/CPAMD8/GPC3/CSTA/C4B/TIMP1/AQP1/HGF/SERPINA1/C4A	31
BP	GO:0008544	epidermis development	44/672	463/18862	3.49261e-09	1.07747e-06	8.7788e-07	AKR1C3/EREG/KRTAP19-1/KRT13/KRT23/CASP14/CYP27B1/CST6/FOXE1/FST/KRT33A/KLK7/SNAI1/TCHH/KRT10/TNF/KRT7/SPRR1A/ERRFI1/SPINK6/SPRR2F/LCE1F/GRHL3/KRT86/KRT4/KRT24/SPRR3/FGFR2/KRT15/KRT31/TGM3/MYCL/CSTA/KLK5/RPTN/KRT20/INHBA/SPRR4/LAMC2/KRT81/ZNF750/SOX21/KRT77/SOSTDC1	44
BP	GO:0010951	negative regulation of endopeptidase activity	30/672	245/18862	3.88833e-09	1.11958e-06	9.12189e-07	SERPIND1/SERPINB2/LTF/CST6/FETUB/SPINK1/TNF/AMBP/NLRP7/C3/VTN/CST2/SPINK6/SERPINE1/COL4A3/TIMP3/DPEP1/SERPINB12/A2M/AGT/SERPINB11/TFPI2/CPAMD8/CSTA/C4B/TIMP1/AQP1/HGF/SERPINA1/C4A	30
BP	GO:0097529	myeloid leukocyte migration	28/672	218/18862	4.42061e-09	1.19329e-06	9.72243e-07	GP2/CCL2/CCL7/PPBP/VEGFC/SAA1/AGER/C5AR2/CCL13/SERPINE1/CCL23/CSF3R/DPEP1/SFTPD/CXCL5/CXCL11/PLA2G1B/CXCL13/CSF1R/EMILIN1/ADAM8/MMP28/CCL22/DPP4/TNFSF18/LBP/CXCL2/CCL21	28
BP	GO:0042573	retinoic acid metabolic process	11/672	33/18862	1.02419e-08	2.60206e-06	2.12005e-06	AKR1C3/UGT1A8/ADH1C/UGT1A7/ADH7/CYP27C1/CYP2C18/CYP2W1/CYP26A1/ALDH1A3/ADH1B	11
BP	GO:1990266	neutrophil migration	20/672	123/18862	1.3253e-08	3.14942e-06	2.56602e-06	GP2/CCL2/CCL7/PPBP/SAA1/C5AR2/CCL13/CCL23/CSF3R/DPEP1/CXCL5/CXCL11/PLA2G1B/CXCL13/ADAM8/CCL22/DPP4/LBP/CXCL2/CCL21	20
BP	GO:0097530	granulocyte migration	22/672	148/18862	1.38548e-08	3.14942e-06	2.56602e-06	GP2/CCL2/CCL7/PPBP/SAA1/C5AR2/CCL13/CCL23/CSF3R/DPEP1/CXCL5/CXCL11/PLA2G1B/CXCL13/CSF1R/ADAM8/CCL22/DPP4/TNFSF18/LBP/CXCL2/CCL21	22
BP	GO:0071621	granulocyte chemotaxis	20/672	124/18862	1.52831e-08	3.21106e-06	2.61624e-06	CCL2/CCL7/PPBP/SAA1/C5AR2/CCL13/CCL23/CSF3R/DPEP1/CXCL5/CXCL11/PLA2G1B/CXCL13/CSF1R/CCL22/DPP4/TNFSF18/LBP/CXCL2/CCL21	20
BP	GO:0046883	regulation of hormone secretion	30/672	260/18862	1.56129e-08	3.21106e-06	2.61624e-06	GRP/CACNA2D2/TNF/FGA/FGG/ADRA2A/CAMK2N1/ADORA1/RETN/POMC/AGT/NMU/FOXA2/SYT7/GPR68/ADCY8/UCN3/SNAP25/NOS2/IL11/LIF/TFAP2B/AGTR2/INHBA/NR0B2/SCG5/P2RY1/DPP4/ALOX5/FGB	30
BP	GO:0030593	neutrophil chemotaxis	18/672	103/18862	2.20871e-08	4.30004e-06	3.5035e-06	CCL2/CCL7/PPBP/SAA1/C5AR2/CCL13/CCL23/CSF3R/DPEP1/CXCL5/CXCL11/PLA2G1B/CXCL13/CCL22/DPP4/LBP/CXCL2/CCL21	18
BP	GO:0030449	regulation of complement activation	19/672	115/18862	2.33456e-08	4.30004e-06	3.5035e-06	IGKV1-39/IGHV3-13/IGKV2D-28/C3/VTN/SUSD4/C5AR2/CFI/A2M/C7/IGHV3-53/IGKV1D-39/C4B/CPB2/CFB/C4BPA/VSIG4/CR2/C4A	19
BP	GO:0045785	positive regulation of cell adhesion	40/672	425/18862	2.38946e-08	4.30004e-06	3.5035e-06	CCN1/SOX2/MYADM/ADAM19/FN1/CCL2/OLFM4/EBI3/TNF/FGA/SAA1/FGG/AGER/NLRP3/COL8A1/ITGA3/TGM2/FOXA2/CEACAM6/FSTL3/FOXC2/MEGF10/CXCL13/SELE/LIF/EMILIN1/PRSS2/TFRC/UNC13D/ADAM8/ICAM1/ETS1/NDNF/NR4A3/DPP4/ALOX5/TNFSF18/CCL21/FGB/IL1A	40
BP	GO:0006805	xenobiotic metabolic process	19/672	120/18862	4.75526e-08	8.21518e-06	6.6934e-06	GSTM1/UGT1A8/RORC/UGT1A7/GSTM3/GSTA4/DPEP1/AKR1C1/CYP2C18/UGT1A10/AADAC/CYP2W1/GSTA1/CYP26A1/ALDH3A1/SULT1A2/AOC3/AOC1/GSTM2	19
BP	GO:0052547	regulation of peptidase activity	41/672	455/18862	5.38336e-08	8.79204e-06	7.1634e-06	CCN1/SERPIND1/SERPINB2/LTF/SOX2/CST6/FETUB/FN1/SPINK1/TNF/AMBP/NLRP7/C3/VTN/CST2/ATP2A3/AGER/SPINK6/SERPINE1/ARRB1/NLRP3/COL4A3/TIMP3/DLC1/DPEP1/SERPINB12/A2M/AGT/SERPINB11/TFPI2/CPAMD8/EPHA7/CLDN3/GPC3/CSTA/C4B/TIMP1/AQP1/HGF/SERPINA1/C4A	41
BP	GO:0032963	collagen metabolic process	18/672	109/18862	5.4963e-08	8.79204e-06	7.1634e-06	MMP2/ERRFI1/MMP7/KLK6/MMP3/MFAP4/COL1A1/COL1A2/COL5A1/MMP13/MMP1/CIITA/EMILIN1/PRSS2/TNXB/FAP/MMP28/MMP19	18
BP	GO:0003018	vascular process in circulatory system	28/672	245/18862	5.78151e-08	8.91798e-06	7.26601e-06	SLCO2B1/SLC4A4/CPS1/GJA5/HTR1D/FGA/FGG/ATP2A3/AGER/TJP3/COMP/ADRA2A/PDE2A/ADORA1/AGT/ADRA2B/PDE3A/FOXC2/KLF2/SLC5A5/C2CD4B/TFRC/AGTR2/ABCC5/AKAP12/ICAM1/P2RY1/FGB	28
BP	GO:0071674	mononuclear cell migration	24/672	190/18862	7.74697e-08	1.15376e-05	9.40041e-06	PADI2/S1PR1/C10orf99/CCL2/CCL7/TNF/BMP5/SAA1/AGER/CCL13/SERPINE1/CCL23/CXCL11/GPR15/MYO1G/CXCL13/CSF1R/ADAM8/ARTN/CCL22/ICAM1/ALOX5/TNFSF18/CCL21	24
BP	GO:0042742	defense response to bacterium	34/672	344/18862	8.45161e-08	1.21675e-05	9.91359e-06	IGLL1/IGHV3-13/COLEC12/LTF/PLA2G2A/C10orf99/KLK7/PGC/IGHV3-38/TNF/PPBP/FGA/ADAMTS5/DMBT1/RNASE7/SERPINE1/SFTPD/GSDMA/IGHV3-53/IGHV3-66/PGLYRP3/PLA2G1B/SSC5D/PLAC8/CXCL13/NOS2/IGHD/KLK5/GBP6/AQP1/COCH/TNFSF8/LBP/FGB	34
BP	GO:0071466	cellular response to xenobiotic stimulus	19/672	125/18862	9.31718e-08	1.29809e-05	1.05763e-05	GSTM1/UGT1A8/RORC/UGT1A7/GSTM3/GSTA4/DPEP1/AKR1C1/CYP2C18/UGT1A10/AADAC/CYP2W1/GSTA1/CYP26A1/ALDH3A1/SULT1A2/AOC3/AOC1/GSTM2	19
BP	GO:0045861	negative regulation of proteolysis	34/672	346/18862	9.72152e-08	1.3121e-05	1.06905e-05	SERPIND1/SERPINB2/LTF/CST6/FETUB/SPINK1/TNF/AMBP/NLRP7/C3/VTN/CST2/SPINK6/SERPINE1/COL4A3/TIMP3/DPEP1/CAMK2N1/SERPINB12/A2M/AGT/SERPINB11/TFPI2/CPAMD8/GPC3/CSTA/C4B/CPB2/TIMP1/LRRK2/AQP1/HGF/SERPINA1/C4A	34
BP	GO:0006909	phagocytosis	36/672	381/18862	1.09645e-07	1.43502e-05	1.1692e-05	IGLL1/IGKV1-39/IGHV3-13/COLEC12/SFTPA1/IGKV2D-28/CCL2/IGHV3-38/CEACAM4/TNF/C3/P2RY6/ITGB3/TGM2/SFTPD/ADORA1/FCN1/FCGR2A/SYT7/IGHV3-53/PLA2G5/MARCO/IGHV3-66/IGKV1D-39/MYO1G/C4B/MEGF10/RHOBTB2/DYSF/IGHD/C4BPA/CD93/UNC13D/LBP/FCN3/C4A	36
BP	GO:0031424	keratinization	26/672	225/18862	1.37631e-07	1.74831e-05	1.42445e-05	KRTAP19-1/KRT13/KRT23/CASP14/KRT33A/TCHH/KRT10/KRT7/SPRR1A/SPINK6/SPRR2F/LCE1F/KRT86/KRT4/KRT24/SPRR3/KRT15/KRT31/TGM3/CSTA/KLK5/RPTN/KRT20/SPRR4/KRT81/KRT77	26
BP	GO:0046688	response to copper ion	11/672	42/18862	1.69079e-07	2.08643e-05	1.69994e-05	MT1H/MT1A/MT1E/LOXL2/MT1M/MT2A/SOD3/AQP1/ICAM1/AOC1/IL1A	11
BP	GO:0060326	cell chemotaxis	31/672	306/18862	1.81837e-07	2.18154e-05	1.77743e-05	PADI2/S1PR1/C10orf99/CCL2/CCL7/PPBP/VEGFC/SAA1/C5AR2/CCL13/SERPINE1/CCL23/CSF3R/DPEP1/SFTPD/CXCL5/CXCL11/PLA2G1B/CXCL13/EPHB1/CSF1R/ADAM8/MMP28/CCL22/HGF/DPP4/ALOX5/TNFSF18/LBP/CXCL2/CCL21	31
BP	GO:0009410	response to xenobiotic stimulus	19/672	131/18862	1.9933e-07	2.32678e-05	1.89576e-05	GSTM1/UGT1A8/RORC/UGT1A7/GSTM3/GSTA4/DPEP1/AKR1C1/CYP2C18/UGT1A10/AADAC/CYP2W1/GSTA1/CYP26A1/ALDH3A1/SULT1A2/AOC3/AOC1/GSTM2	19
BP	GO:0052548	regulation of endopeptidase activity	38/672	426/18862	2.15419e-07	2.4484e-05	1.99486e-05	CCN1/SERPIND1/SERPINB2/LTF/SOX2/CST6/FETUB/SPINK1/TNF/AMBP/NLRP7/C3/VTN/CST2/ATP2A3/AGER/SPINK6/SERPINE1/ARRB1/NLRP3/COL4A3/TIMP3/DLC1/DPEP1/SERPINB12/A2M/AGT/SERPINB11/TFPI2/CPAMD8/EPHA7/CSTA/C4B/TIMP1/AQP1/HGF/SERPINA1/C4A	38
BP	GO:0002526	acute inflammatory response	17/672	107/18862	2.28983e-07	2.53584e-05	2.0661e-05	ORM2/FN1/TNF/CD163/SAA1/C3/NLRP3/ADORA1/ORM1/TREM1/SAA2/C2CD4B/ADAM8/ICAM1/LBP/SERPINA1/IL1A	17
BP	GO:0030216	keratinocyte differentiation	30/672	302/18862	4.37401e-07	4.60765e-05	3.75413e-05	AKR1C3/EREG/KRTAP19-1/KRT13/KRT23/CASP14/CYP27B1/KRT33A/TCHH/KRT10/KRT7/SPRR1A/ERRFI1/SPINK6/SPRR2F/LCE1F/KRT86/KRT4/KRT24/SPRR3/KRT15/KRT31/TGM3/CSTA/KLK5/RPTN/KRT20/SPRR4/KRT81/KRT77	30
BP	GO:0046879	hormone secretion	30/672	302/18862	4.37401e-07	4.60765e-05	3.75413e-05	GRP/CACNA2D2/TNF/FGA/FGG/ADRA2A/CAMK2N1/ADORA1/RETN/POMC/AGT/NMU/FOXA2/SYT7/GPR68/ADCY8/UCN3/SNAP25/NOS2/IL11/LIF/TFAP2B/AGTR2/INHBA/NR0B2/SCG5/P2RY1/DPP4/ALOX5/FGB	30
BP	GO:0070098	chemokine-mediated signaling pathway	15/672	88/18862	4.59777e-07	4.72804e-05	3.85221e-05	PADI2/CCL2/CCL7/PPBP/CCL13/CCL23/ACKR1/CXCL5/CXCL11/THPO/CXCL13/SLIT3/CCL22/CXCL2/CCL21	15
BP	GO:0070374	positive regulation of ERK1 and ERK2 cascade	24/672	210/18862	5.0923e-07	5.1148e-05	4.16733e-05	PLA2G2A/CCL2/CCL7/TNF/FGA/FGG/AGER/P2RY6/C5AR2/CCL13/CCL23/ARRB1/NECAB2/PLA2G5/FGFR2/MARCO/THPO/CSF1R/AKAP12/CCL22/ICAM1/P2RY1/CCL21/FGB	24
BP	GO:0019730	antimicrobial humoral response	19/672	142/18862	7.15045e-07	7.01882e-05	5.71865e-05	LTF/PLA2G2A/KLK7/PGC/PPBP/FGA/DMBT1/RNASE7/CCL13/SFTPD/CXCL5/CXCL11/PGLYRP3/PLA2G1B/CXCL13/KLK5/PRSS2/CXCL2/FGB	19
BP	GO:0043129	surfactant homeostasis	6/672	11/18862	7.93017e-07	7.6112e-05	6.2013e-05	ABCA3/ITGB6/SFTPD/ADGRF5/LPCAT1/NAPSA	6
BP	GO:0009914	hormone transport	30/672	312/18862	8.72968e-07	8.19641e-05	6.6781e-05	GRP/CACNA2D2/TNF/FGA/FGG/ADRA2A/CAMK2N1/ADORA1/RETN/POMC/AGT/NMU/FOXA2/SYT7/GPR68/ADCY8/UCN3/SNAP25/NOS2/IL11/LIF/TFAP2B/AGTR2/INHBA/NR0B2/SCG5/P2RY1/DPP4/ALOX5/FGB	30
BP	GO:0072676	lymphocyte migration	17/672	118/18862	9.5742e-07	8.79808e-05	7.16832e-05	PADI2/S1PR1/C10orf99/CCL2/CCL7/SAA1/CCL13/CCL23/CXCL11/GPR15/MYO1G/CXCL13/ADAM8/ARTN/CCL22/ICAM1/CCL21	17
BP	GO:0033627	cell adhesion mediated by integrin	13/672	72/18862	1.35732e-06	0.000119993	9.77653e-05	ITGB6/VTN/ITGB3/SERPINE1/MUC1/FOXC2/CXCL13/LIF/ITGBL1/ICAM1/DPP4/CCL21/TESC	13
BP	GO:0001523	retinoid metabolic process	16/672	108/18862	1.36135e-06	0.000119993	9.77653e-05	AKR1C3/UGT1A8/ADH1C/UGT1A7/ADH7/AKR1C1/CYP27C1/CYP2C18/CYP2W1/GPC3/GPC6/LPL/CYP26A1/ALDH1A3/GPIHBP1/ADH1B	16
BP	GO:0043277	apoptotic cell clearance	11/672	51/18862	1.40494e-06	0.000121358	9.88779e-05	CCL2/C3/ITGB3/TGM2/FCN1/MARCO/C4B/MEGF10/RHOBTB2/FCN3/C4A	11
BP	GO:0042363	fat-soluble vitamin catabolic process	6/672	12/18862	1.53816e-06	0.000130261	0.000106132	CYP27B1/CYP4F3/CYP2W1/CYP24A1/CYP26A1/CYP4F11	6
BP	GO:1990868	response to chemokine	15/672	97/18862	1.66672e-06	0.000135822	0.000110662	PADI2/CCL2/CCL7/PPBP/CCL13/CCL23/ACKR1/CXCL5/CXCL11/THPO/CXCL13/SLIT3/CCL22/CXCL2/CCL21	15
BP	GO:1990869	cellular response to chemokine	15/672	97/18862	1.66672e-06	0.000135822	0.000110662	PADI2/CCL2/CCL7/PPBP/CCL13/CCL23/ACKR1/CXCL5/CXCL11/THPO/CXCL13/SLIT3/CCL22/CXCL2/CCL21	15
BP	GO:0006910	phagocytosis, recognition	15/672	98/18862	1.90418e-06	0.000152299	0.000124087	IGLL1/IGHV3-13/COLEC12/SFTPA1/IGHV3-38/FCN1/IGHV3-53/PLA2G5/IGHV3-66/C4B/MEGF10/IGHD/C4BPA/LBP/FCN3	15
BP	GO:0032102	negative regulation of response to external stimulus	34/672	394/18862	1.98173e-06	0.00015562	0.000126793	PADI2/SERPINB2/LTF/SEMA6D/CCL2/TNF/SEMA3E/FGA/SAA1/FGG/VTN/SUSD4/SEMA3A/C5AR2/SERPINE1/SLC6A3/NLRP3/SMPDL3B/ADORA1/A2M/CLDN3/CPB2/CXCL13/NT5E/SEMA3B/RGMA/FAP/MMP28/VSIG4/PROC/HGF/DPP4/ALOX5/FGB	34
BP	GO:0002791	regulation of peptide secretion	29/672	308/18862	2.02675e-06	0.000156313	0.000127357	GRP/CACNA2D2/TNF/FGA/VEGFC/SAA1/FGG/KCNN4/ANKRD1/ADRA2A/CAMK2N1/ADORA1/NMU/FOXA2/SYT7/GPR68/ADCY8/UCN3/PLA2G1B/SNAP25/NOS2/TFAP2B/KRT20/NR0B2/ADAM8/DPP4/ALOX5/FGB/IL1A	29
BP	GO:0048247	lymphocyte chemotaxis	12/672	64/18862	2.27854e-06	0.00017265	0.000140668	PADI2/C10orf99/CCL2/CCL7/SAA1/CCL13/CCL23/CXCL11/CXCL13/ADAM8/CCL22/CCL21	12
BP	GO:0018149	peptide cross-linking	9/672	35/18862	2.69497e-06	0.000198235	0.000161514	FN1/KRT10/SPRR1A/COL3A1/TGM2/SPRR3/TGM3/CSTA/NDNF	9
BP	GO:0050708	regulation of protein secretion	27/672	279/18862	2.708e-06	0.000198235	0.000161514	CACNA2D2/TNF/FGA/VEGFC/SAA1/FGG/KCNN4/ANKRD1/ADRA2A/CAMK2N1/NMU/FOXA2/SYT7/GPR68/ADCY8/UCN3/PLA2G1B/SNAP25/NOS2/TFAP2B/KRT20/NR0B2/ADAM8/DPP4/ALOX5/FGB/IL1A	27
BP	GO:0048875	chemical homeostasis within a tissue	6/672	13/18862	2.77043e-06	0.000199425	0.000162483	ABCA3/ITGB6/SFTPD/ADGRF5/LPCAT1/NAPSA	6
BP	GO:0016101	diterpenoid metabolic process	16/672	114/18862	2.82921e-06	0.000200318	0.000163211	AKR1C3/UGT1A8/ADH1C/UGT1A7/ADH7/AKR1C1/CYP27C1/CYP2C18/CYP2W1/GPC3/GPC6/LPL/CYP26A1/ALDH1A3/GPIHBP1/ADH1B	16
BP	GO:0002455	humoral immune response mediated by circulating immunoglobulin	19/672	156/18862	3.01587e-06	0.000207476	0.000169043	IGLL1/IGKV1-39/IGHV3-13/IGKV2D-28/IGHV3-38/TNF/FCER2/C3/SUSD4/CFI/C7/IGHV3-53/IGHV3-66/IGKV1D-39/C4B/IGHD/C4BPA/CR2/C4A	19
BP	GO:0002576	platelet degranulation	17/672	128/18862	3.02639e-06	0.000207476	0.000169043	ORM2/FN1/PPBP/FGA/VEGFC/FGG/ITGB3/SERPINE1/TIMP3/ORM1/A2M/CLEC3B/TIMP1/SCG3/HGF/SERPINA1/FGB	17
BP	GO:0061844	antimicrobial humoral immune response mediated by antimicrobial peptide	13/672	78/18862	3.4688e-06	0.00023409	0.000190727	LTF/KLK7/PGC/PPBP/RNASE7/CCL13/CXCL5/CXCL11/PGLYRP3/PLA2G1B/CXCL13/KLK5/CXCL2	13
BP	GO:0010038	response to metal ion	31/672	352/18862	3.68604e-06	0.000244923	0.000199554	AKR1C3/MT1H/CPS1/CRIP1/MT1A/FGA/FGG/MT1E/TNNC1/KCNK3/LOXL2/SLC6A3/DPEP1/FOSB/SYT7/RASGRP2/ADCY8/SYT12/MT1M/FSTL3/MT2A/GUCA1A/SOD3/LRRK2/AQP1/ICAM1/FBP1/AOC1/PLN/FGB/IL1A	31
BP	GO:0006953	acute-phase response	10/672	46/18862	3.93403e-06	0.000257441	0.000209752	ORM2/FN1/TNF/CD163/SAA1/ORM1/SAA2/LBP/SERPINA1/IL1A	10
BP	GO:0002685	regulation of leukocyte migration	22/672	205/18862	4.30164e-06	0.000277295	0.000225929	PADI2/C10orf99/CCL2/CCL7/TNF/BMP5/VEGFC/AGER/C5AR2/SERPINE1/ADORA1/CXCL13/CSF1R/SELE/EMILIN1/ADAM8/MMP28/ICAM1/DPP4/TNFSF18/LBP/CCL21	22
BP	GO:0048771	tissue remodeling	20/672	175/18862	4.48745e-06	0.000285019	0.000232222	S1PR1/PTH1R/CSPG4/MMP2/AGER/ITGB3/PDK4/RSPO3/TGM2/AGT/SYT7/FOXC2/CSF1R/TIMP1/LIF/TFRC/AGTR2/ADAM8/CLDN18/IL1A	20
BP	GO:0009111	vitamin catabolic process	6/672	14/18862	4.7021e-06	0.000294324	0.000239804	CYP27B1/CYP4F3/CYP2W1/CYP24A1/CYP26A1/CYP4F11	6
BP	GO:0030574	collagen catabolic process	10/672	47/18862	4.83919e-06	0.000298578	0.00024327	MMP2/MMP7/KLK6/MMP3/MMP13/MMP1/PRSS2/FAP/MMP28/MMP19	10
BP	GO:0050731	positive regulation of peptidyl-tyrosine phosphorylation	21/672	193/18862	5.69401e-06	0.000345255	0.0002813	CSF2/EREG/CSPG4/TNF/IL24/CRLF1/VTN/ITGB3/CSF3/ADRA2A/ADORA1/AGT/NTRK2/CSF1R/IL11/LIF/AREG/TSLP/ICAM1/HGF/TNFSF18	21
BP	GO:0030324	lung development	19/672	163/18862	5.79237e-06	0.000345255	0.0002813	ABCA3/SPDEF/CCBE1/TNF/ITGB6/ERRFI1/HHIP/PROX1/ITGA3/SFTPD/MME/FGFR2/NKX2-1/GPC3/FSTL3/KLF2/LIF/CRISPLD2/TCF21	19
BP	GO:0009913	epidermal cell differentiation	31/672	360/18862	5.83552e-06	0.000345255	0.0002813	AKR1C3/EREG/KRTAP19-1/KRT13/KRT23/CASP14/CYP27B1/KRT33A/TCHH/KRT10/KRT7/SPRR1A/ERRFI1/SPINK6/SPRR2F/LCE1F/KRT86/KRT4/KRT24/SPRR3/KRT15/KRT31/TGM3/MYCL/CSTA/KLK5/RPTN/KRT20/SPRR4/KRT81/KRT77	31
BP	GO:1900047	negative regulation of hemostasis	10/672	49/18862	7.20199e-06	0.000420343	0.000342479	SERPINB2/FGA/FGG/VTN/SERPINE1/COMP/CPB2/FAP/PROC/FGB	10
BP	GO:0003158	endothelium development	17/672	137/18862	7.69932e-06	0.000438517	0.000357286	S1PR1/WNT7A/MYADM/GJA5/TNF/TMEM100/ARHGEF26/TJP3/GSTM3/PROX1/PDE2A/HOXB5/CLDN3/ATOH8/FOXC2/PROC/ICAM1	17
BP	GO:0042476	odontogenesis	16/672	123/18862	7.71644e-06	0.000438517	0.000357286	SP6/FST/WNT6/ITGB6/ADAMTS5/SERPINE1/CSF3R/FAM20A/FGFR2/COL1A1/COL1A2/DMRT3/KLK5/INHBA/AQP1/SOSTDC1	16
BP	GO:0050730	regulation of peptidyl-tyrosine phosphorylation	25/672	262/18862	8.06927e-06	0.000452613	0.000368771	CSF2/EREG/CSPG4/SPINK1/TNF/IL24/CRLF1/ERRFI1/VTN/ITGB3/CSF3/ADRA2A/ADORA1/AGT/EPHA7/GPRC5A/NTRK2/CSF1R/IL11/LIF/AREG/TSLP/ICAM1/HGF/TNFSF18	25
BP	GO:0030323	respiratory tube development	19/672	167/18862	8.26157e-06	0.000457458	0.000372718	ABCA3/SPDEF/CCBE1/TNF/ITGB6/ERRFI1/HHIP/PROX1/ITGA3/SFTPD/MME/FGFR2/NKX2-1/GPC3/FSTL3/KLF2/LIF/CRISPLD2/TCF21	19
BP	GO:0006721	terpenoid metabolic process	16/672	124/18862	8.57229e-06	0.000464522	0.000378474	AKR1C3/UGT1A8/ADH1C/UGT1A7/ADH7/AKR1C1/CYP27C1/CYP2C18/CYP2W1/GPC3/GPC6/LPL/CYP26A1/ALDH1A3/GPIHBP1/ADH1B	16
BP	GO:0002460	adaptive immune response based on somatic recombination of immune receptors built from immunoglobulin superfamily domains	31/672	367/18862	8.60425e-06	0.000464522	0.000378474	IGLL1/IGKV1-39/IGHV3-13/IGKV2D-28/RORC/EBI3/IGHV3-38/TNF/IL13RA2/FCER2/C3/SUSD4/AGER/NLRP3/CFI/C7/IGHV3-53/IGHV3-66/IL1RL1/IGKV1D-39/MYO1G/C4B/CXCL13/IGHD/C4BPA/TFRC/UNC13D/ICAM1/CR2/TNFSF18/C4A	31
BP	GO:0008037	cell recognition	23/672	232/18862	9.89493e-06	0.000527608	0.000429873	IGLL1/IGHV3-13/COLEC12/SFTPA1/FETUB/IGHV3-38/SEMA3A/PAEP/FOLR1/FCN1/FOLR3/VSTM2L/IGHV3-53/PLA2G5/IGHV3-66/C4B/MEGF10/IGHD/C4BPA/CNTNAP2/LBP/CCL21/FCN3	23
BP	GO:0061045	negative regulation of wound healing	12/672	74/18862	1.09977e-05	0.000578897	0.000471662	SERPINB2/TNF/FGA/FGG/VTN/SERPINE1/CLDN3/CPB2/FAP/PROC/ALOX5/FGB	12
BP	GO:0006958	complement activation, classical pathway	17/672	141/18862	1.13454e-05	0.000578897	0.000471662	IGLL1/IGKV1-39/IGHV3-13/IGKV2D-28/IGHV3-38/C3/SUSD4/CFI/C7/IGHV3-53/IGHV3-66/IGKV1D-39/C4B/IGHD/C4BPA/CR2/C4A	17
BP	GO:0042445	hormone metabolic process	22/672	218/18862	1.1595e-05	0.000578897	0.000471662	AKR1C3/CYP27B1/UGT1A8/FOXE1/ADH1C/BMP5/UGT1A7/AKR1C2/PCSK1/KLK6/ADH7/AKR1C1/CYP27C1/CGA/CYP2C18/MME/CYP2W1/SLC5A5/CYP26A1/SCG5/ALDH1A3/ADH1B	22
BP	GO:0002697	regulation of immune effector process	36/672	465/18862	1.16613e-05	0.000578897	0.000471662	IGKV1-39/IGHV3-13/IGKV2D-28/KLK7/PGC/TNF/IL13RA2/FCER2/C3/VTN/SUSD4/AGER/C5AR2/NLRP3/CFI/A2M/C7/IGHV3-53/PLA2G5/PGLYRP3/IGKV1D-39/C4B/CPB2/NOS2/KLK5/CFB/C4BPA/TFRC/UNC13D/VSIG4/ICAM1/NR4A3/CR2/TNFSF18/LBP/C4A	36
BP	GO:0035296	regulation of tube diameter	16/672	127/18862	1.16707e-05	0.000578897	0.000471662	CPS1/GJA5/HTR1D/FGA/FGG/COMP/ADRA2A/ADORA1/AGT/ADRA2B/FOXC2/KLF2/AGTR2/ICAM1/P2RY1/FGB	16
BP	GO:0097746	blood vessel diameter maintenance	16/672	127/18862	1.16707e-05	0.000578897	0.000471662	CPS1/GJA5/HTR1D/FGA/FGG/COMP/ADRA2A/ADORA1/AGT/ADRA2B/FOXC2/KLF2/AGTR2/ICAM1/P2RY1/FGB	16
BP	GO:0034116	positive regulation of heterotypic cell-cell adhesion	6/672	16/18862	1.17951e-05	0.000578897	0.000471662	TNF/FGA/FGG/AGER/CEACAM6/FGB	6
BP	GO:0035150	regulation of tube size	16/672	128/18862	1.29056e-05	0.000626283	0.00051027	CPS1/GJA5/HTR1D/FGA/FGG/COMP/ADRA2A/ADORA1/AGT/ADRA2B/FOXC2/KLF2/AGTR2/ICAM1/P2RY1/FGB	16
BP	GO:0060541	respiratory system development	20/672	188/18862	1.32409e-05	0.000635417	0.000517712	ABCA3/SPDEF/CCBE1/TNF/ITGB6/ERRFI1/HHIP/PROX1/ITGA3/SFTPD/MME/FGFR2/NKX2-1/GPC3/FSTL3/KLF2/LIF/CRISPLD2/ALDH1A3/TCF21	20
BP	GO:0007596	blood coagulation	29/672	342/18862	1.55302e-05	0.000737087	0.000600549	SERPIND1/SERPINB2/FN1/NFE2/COL3A1/FGA/SAA1/FGG/VTN/ITGB3/SERPINE1/ARRB1/COMP/ADRA2A/H3C7/A2M/FOXA2/TFPI2/GNA14/COL1A1/COL1A2/ADRA2B/CPB2/CYP4F11/FAP/PROC/P2RY1/SERPINA1/FGB	29
BP	GO:0031214	biomineral tissue development	18/672	160/18862	1.65816e-05	0.000778436	0.000634238	CCN1/LTF/S1PR1/PTH1R/CYP27B1/MGP/WNT6/ITGB6/COMP/FAM20A/CLEC3B/FGFR2/COL1A1/COL1A2/GPC3/FBN2/ASGR2/ALOX5	18
BP	GO:0061041	regulation of wound healing	16/672	131/18862	1.73372e-05	0.000802845	0.000654125	SERPINB2/TNFRSF12A/TNF/FGA/FGG/VTN/SERPINE1/ADRA2A/FOXA2/CLDN3/FOXC2/CPB2/FAP/PROC/ALOX5/FGB	16
BP	GO:1903035	negative regulation of response to wounding	13/672	90/18862	1.74733e-05	0.000802845	0.000654125	SERPINB2/TNF/FGA/FGG/VTN/SERPINE1/CLDN3/CPB2/RGMA/FAP/PROC/ALOX5/FGB	13
BP	GO:0030199	collagen fibril organization	10/672	54/18862	1.78627e-05	0.000812097	0.000661664	COL3A1/LOXL2/COMP/COL1A1/COL1A2/COL5A3/COL5A1/FOXC2/EMILIN1/TNXB	10
BP	GO:0023061	signal release	36/672	475/18862	1.84753e-05	0.000831195	0.000677224	GRP/CACNA2D2/SLC5A7/WNT7A/TNF/FGA/FGG/ADRA2A/CAMK2N1/ADORA1/RETN/POMC/AGT/NMU/FOXA2/SYT7/GPR68/ADCY8/SYT12/UCN3/SNAP25/ADRA2B/SNCG/NOS2/IL11/LIF/TFAP2B/LRRK2/AGTR2/INHBA/NR0B2/SCG5/P2RY1/DPP4/ALOX5/FGB	36
BP	GO:0002237	response to molecule of bacterial origin	29/672	346/18862	1.93086e-05	0.000844943	0.000688426	CSF2/LTF/CYP27B1/CPS1/CCL2/TNF/PPBP/IL24/MRC1/NLRP7/DMBT1/ANKRD1/SERPINE1/PALM3/NLRP3/CSF3/CXCL5/CXCL11/FGFR2/SSC5D/C4B/CXCL13/NOS2/SELE/AKAP12/ICAM1/LBP/CXCL2/IL1A	29
BP	GO:0007599	hemostasis	29/672	346/18862	1.93086e-05	0.000844943	0.000688426	SERPIND1/SERPINB2/FN1/NFE2/COL3A1/FGA/SAA1/FGG/VTN/ITGB3/SERPINE1/ARRB1/COMP/ADRA2A/H3C7/A2M/FOXA2/TFPI2/GNA14/COL1A1/COL1A2/ADRA2B/CPB2/CYP4F11/FAP/PROC/P2RY1/SERPINA1/FGB	29
BP	GO:0042730	fibrinolysis	7/672	25/18862	1.93718e-05	0.000844943	0.000688426	SERPINB2/FGA/FGG/SERPINE1/CPB2/FAP/FGB	7
BP	GO:0110148	biomineralization	18/672	162/18862	1.96577e-05	0.000844943	0.000688426	CCN1/LTF/S1PR1/PTH1R/CYP27B1/MGP/WNT6/ITGB6/COMP/FAM20A/CLEC3B/FGFR2/COL1A1/COL1A2/GPC3/FBN2/ASGR2/ALOX5	18
BP	GO:0022409	positive regulation of cell-cell adhesion	25/672	276/18862	1.9759e-05	0.000844943	0.000688426	SOX2/ADAM19/CCL2/EBI3/TNF/FGA/FGG/AGER/NLRP3/FOXA2/CEACAM6/FSTL3/MEGF10/CXCL13/SELE/TFRC/ADAM8/ICAM1/ETS1/NR4A3/DPP4/ALOX5/CCL21/FGB/IL1A	25
BP	GO:0050817	coagulation	29/672	347/18862	2.03754e-05	0.00086276	0.000702942	SERPIND1/SERPINB2/FN1/NFE2/COL3A1/FGA/SAA1/FGG/VTN/ITGB3/SERPINE1/ARRB1/COMP/ADRA2A/H3C7/A2M/FOXA2/TFPI2/GNA14/COL1A1/COL1A2/ADRA2B/CPB2/CYP4F11/FAP/PROC/P2RY1/SERPINA1/FGB	29
BP	GO:0050729	positive regulation of inflammatory response	16/672	133/18862	2.0997e-05	0.000880448	0.000717353	PLA2G2A/TNF/C3/SERPINE1/TGM2/PDE2A/AGT/IL1RL1/LPL/LRRK2/C2CD4B/TSLP/ADAM8/ETS1/TNFSF18/LBP	16
BP	GO:0045446	endothelial cell differentiation	15/672	119/18862	2.16252e-05	0.000890392	0.000725456	S1PR1/WNT7A/MYADM/TNF/TMEM100/ARHGEF26/TJP3/GSTM3/PROX1/PDE2A/HOXB5/CLDN3/ATOH8/PROC/ICAM1	15
BP	GO:0008228	opsonization	5/672	11/18862	2.18526e-05	0.000890392	0.000725456	SFTPA1/PLA2G5/C4B/C4BPA/LBP	5
BP	GO:0071492	cellular response to UV-A	5/672	11/18862	2.18526e-05	0.000890392	0.000725456	MMP2/MMP3/MME/MMP1/TIMP1	5
BP	GO:0007369	gastrulation	19/672	179/18862	2.23345e-05	0.000901519	0.000734521	SOX2/MYADM/FN1/SNAI1/MMP2/VTN/ITGB3/COL8A1/ITGA3/DUSP4/OTX2/FOXA2/FGFR2/COL5A1/GPC3/ATOH8/FOXC2/INHBA/NR4A3	19
BP	GO:1900046	regulation of hemostasis	11/672	67/18862	2.25958e-05	0.000903621	0.000736234	SERPINB2/FGA/FGG/VTN/SERPINE1/COMP/FOXA2/CPB2/FAP/PROC/FGB	11
BP	GO:0072507	divalent inorganic cation homeostasis	37/672	499/18862	2.2853e-05	0.000905525	0.000737786	HAP1/MT1H/S1PR1/PTH1R/CYP27B1/CCL7/PTGER2/MT1A/SAA1/ATP2A3/MT1E/P2RY6/C5AR2/KCNK3/SLC35G1/CCL13/CCL23/TGM2/CAMK2N1/FAM20A/ADORA1/CXCL11/NMU/NPSR1/ADCY8/PLA2G1B/MT1M/MT2A/CXCL13/TFAP2B/ATP13A5/SLC39A8/GSTM2/P2RY1/PLN/CALB1/CCL21	37
BP	GO:0090287	regulation of cellular response to growth factor stimulus	26/672	296/18862	2.3162e-05	0.000909423	0.000740961	CCN1/VEPH1/CCBE1/FST/PMEPA1/VEGFC/VTN/ITGB3/CHST11/FOLR1/HHIP/ITGA3/AGT/OTX2/NKX2-1/GPC3/VASN/FSTL3/FGFBP1/CXCL13/FBN2/TFAP2B/EMILIN1/AGTR2/SOST/SOSTDC1	26
BP	GO:0050804	modulation of chemical synaptic transmission	32/672	405/18862	2.37883e-05	0.000925602	0.000754144	HAP1/WNT7A/CCL2/NPTX2/TNF/DCC/AGER/CACNA1B/ADRA2A/ADORA1/RETN/NMU/SYT7/MME/ADCY8/SYT12/PHF24/LRRC4/SNAP25/SNCG/NTRK2/NRGN/LRRK2/SCTR/RASGRF1/NPTX1/FAM107A/AKAP12/P2RY1/SORCS2/IGSF11/CALB1	32
BP	GO:0006775	fat-soluble vitamin metabolic process	9/672	45/18862	2.45966e-05	0.000946089	0.000770835	CBR1/CYP27B1/SNAI1/TNF/CYP4F3/CYP2W1/CYP24A1/CYP26A1/CYP4F11	9
BP	GO:0018108	peptidyl-tyrosine phosphorylation	30/672	369/18862	2.49119e-05	0.000946089	0.000770835	ROS1/CSF2/EREG/CSPG4/SPINK1/TNF/IL24/CRLF1/ERRFI1/VTN/ROR1/ITGB3/CSF3/ADRA2A/ADORA1/AGT/FGFR2/EPHA7/GPRC5A/EPHB6/NTRK2/EPHB1/CSF1R/IL11/LIF/AREG/TSLP/ICAM1/HGF/TNFSF18	30
BP	GO:0099177	regulation of trans-synaptic signaling	32/672	406/18862	2.4972e-05	0.000946089	0.000770835	HAP1/WNT7A/CCL2/NPTX2/TNF/DCC/AGER/CACNA1B/ADRA2A/ADORA1/RETN/NMU/SYT7/MME/ADCY8/SYT12/PHF24/LRRC4/SNAP25/SNCG/NTRK2/NRGN/LRRK2/SCTR/RASGRF1/NPTX1/FAM107A/AKAP12/P2RY1/SORCS2/IGSF11/CALB1	32
BP	GO:0034114	regulation of heterotypic cell-cell adhesion	7/672	26/18862	2.56978e-05	0.000957742	0.00078033	MYADM/TNF/FGA/FGG/AGER/CEACAM6/FGB	7
BP	GO:0006957	complement activation, alternative pathway	6/672	18/18862	2.57231e-05	0.000957742	0.00078033	C3/SUSD4/C7/CFB/VSIG4/CR2	6
BP	GO:0071222	cellular response to lipopolysaccharide	20/672	197/18862	2.62924e-05	0.000970571	0.000790782	CSF2/LTF/CCL2/TNF/PPBP/IL24/MRC1/NLRP7/ANKRD1/SERPINE1/NLRP3/CSF3/CXCL5/CXCL11/CXCL13/NOS2/ICAM1/LBP/CXCL2/IL1A	20
BP	GO:0002793	positive regulation of peptide secretion	17/672	151/18862	2.80124e-05	0.0010253	0.000835374	GRP/FGA/VEGFC/FGG/KCNN4/ANKRD1/CAMK2N1/ADORA1/NMU/GPR68/ADCY8/UCN3/PLA2G1B/NR0B2/ADAM8/FGB/IL1A	17
BP	GO:0018212	peptidyl-tyrosine modification	30/672	372/18862	2.90144e-05	0.00105305	0.000857985	ROS1/CSF2/EREG/CSPG4/SPINK1/TNF/IL24/CRLF1/ERRFI1/VTN/ROR1/ITGB3/CSF3/ADRA2A/ADORA1/AGT/FGFR2/EPHA7/GPRC5A/EPHB6/NTRK2/EPHB1/CSF1R/IL11/LIF/AREG/TSLP/ICAM1/HGF/TNFSF18	30
BP	GO:0002686	negative regulation of leukocyte migration	9/672	46/18862	2.96226e-05	0.00105736	0.000861492	PADI2/CCL2/BMP5/C5AR2/ADORA1/EMILIN1/MMP28/DPP4/CCL21	9
BP	GO:0050919	negative chemotaxis	9/672	46/18862	2.96226e-05	0.00105736	0.000861492	SEMA6D/SEMA3E/SEMA3A/ITGB3/EPHA7/UNC5C/SEMA3B/SLIT3/DPP4	9
BP	GO:0006690	icosanoid metabolic process	15/672	123/18862	3.2127e-05	0.00113735	0.000926667	AKR1C3/CBR1/GSTM1/AKR1C2/PTGDS/DPEP1/CYP4F3/AKR1C1/CYP2C18/PLA2G5/PLA2G1B/GSTA1/GGTLC1/CYP4F11/ALOX5	15
BP	GO:0071692	protein localization to extracellular region	30/672	375/18862	3.37215e-05	0.00118409	0.000964748	CACNA2D2/TNF/FGA/VEGFC/SAA1/FGG/KCNN4/ANKRD1/COMP/ADRA2A/CAMK2N1/NMU/FOXA2/SYT7/GPR68/ADCY8/UCN3/PLA2G1B/SNAP25/SNCG/FBN2/NOS2/TFAP2B/KRT20/NR0B2/ADAM8/DPP4/ALOX5/FGB/IL1A	30
BP	GO:2001236	regulation of extrinsic apoptotic signaling pathway	17/672	154/18862	3.6127e-05	0.00125833	0.00102523	CSF2/TNFRSF12A/TNF/FGA/BMP5/FGG/SERPINE1/TIMP3/AGT/G0S2/PAK5/AGTR2/INHBA/ICAM1/HGF/FGB/IL1A	17
BP	GO:0031589	cell-substrate adhesion	29/672	359/18862	3.80841e-05	0.00130789	0.00106562	CCN1/MYADM/FN1/MSLN/OLFM4/SEMA3E/COL3A1/FGA/ITGB6/FGG/VTN/ITGB3/SERPINE1/COL8A1/ITGA3/DLC1/CEACAM6/COL1A1/COL5A3/MYO1G/L1CAM/EPHB1/ITGBL1/EMILIN1/UNC13D/FAM107A/NDNF/CCL21/FGB	29
BP	GO:0001763	morphogenesis of a branching structure	19/672	186/18862	3.81557e-05	0.00130789	0.00106562	TNF/SEMA3E/WNT6/SEMA3A/ADAMTS16/RSPO3/HHIP/PROX1/TGM2/AGT/FGFR2/EPHA7/NKX2-1/GPC3/FOXC2/LRRK2/AGTR2/TCF21/HGF	19
BP	GO:0090066	regulation of anatomical structure size	36/672	493/18862	4.05246e-05	0.00137816	0.00112287	AQP4/SEMA6D/WNT7A/MYADM/CPS1/FN1/GJA5/HTR1D/SEMA3E/FGA/FGG/KCNN4/DCC/SEMA3A/COMP/CSF3/ADRA2A/ADORA1/AGT/EPHA7/ADRA2B/FOXC2/L1CAM/KLF2/LRRK2/SCTR/SEMA3B/AGTR2/ARHGAP40/AQP1/KANK4/ICAM1/P2RY1/CCL21/FGB/KANK3	36
BP	GO:0030195	negative regulation of blood coagulation	9/672	48/18862	4.2317e-05	0.00142787	0.00116337	SERPINB2/FGA/FGG/VTN/SERPINE1/CPB2/FAP/PROC/FGB	9
BP	GO:0071280	cellular response to copper ion	7/672	28/18862	4.34713e-05	0.00144953	0.00118102	MT1H/MT1A/MT1E/MT1M/MT2A/AQP1/AOC1	7
BP	GO:0051346	negative regulation of hydrolase activity	34/672	456/18862	4.36301e-05	0.00144953	0.00118102	SERPIND1/SERPINB2/LTF/CST6/FETUB/SPINK1/TNF/AMBP/NLRP7/C3/VTN/CST2/SPINK6/SERPINE1/ARRB1/COL4A3/TIMP3/DPEP1/SERPINB12/A2M/AGT/SERPINB11/TFPI2/CPAMD8/GPC3/CSTA/C4B/TIMP1/LRRK2/AQP1/HGF/PLN/SERPINA1/C4A	34
BP	GO:0071248	cellular response to metal ion	19/672	189/18862	4.75594e-05	0.00156073	0.00127162	AKR1C3/MT1H/MT1A/MT1E/KCNK3/DPEP1/FOSB/SYT7/RASGRP2/ADCY8/SYT12/MT1M/FSTL3/MT2A/GUCA1A/LRRK2/AQP1/FBP1/AOC1	19
BP	GO:0001503	ossification	31/672	401/18862	4.80613e-05	0.00156073	0.00127162	CCN1/CHRDL2/LTF/S1PR1/SOX2/PTH1R/CYP27B1/SMOC1/SNAI1/MMP2/ATP6V0A4/TNF/MGP/BMP5/VEGFC/COMP/CLEC3B/FGFR2/COL1A1/COL1A2/GPC3/CYP24A1/FSTL3/FOXC2/FBN2/FHL2/BMP3/SOST/HGF/ASGR2/ALOX5	31
BP	GO:0002790	peptide secretion	31/672	401/18862	4.80613e-05	0.00156073	0.00127162	GRP/CACNA2D2/TNF/FGA/VEGFC/SAA1/FGG/KCNN4/ANKRD1/COMP/ADRA2A/CAMK2N1/ADORA1/NMU/FOXA2/SYT7/GPR68/ADCY8/UCN3/PLA2G1B/SNAP25/SNCG/NOS2/TFAP2B/KRT20/NR0B2/ADAM8/DPP4/ALOX5/FGB/IL1A	31
BP	GO:0030282	bone mineralization	14/672	113/18862	4.90195e-05	0.00157997	0.00128729	CCN1/LTF/S1PR1/PTH1R/CYP27B1/MGP/COMP/CLEC3B/FGFR2/COL1A2/GPC3/FBN2/ASGR2/ALOX5	14
BP	GO:0016064	immunoglobulin mediated immune response	21/672	223/18862	5.10502e-05	0.00163323	0.00133069	IGLL1/IGKV1-39/IGHV3-13/IGKV2D-28/IGHV3-38/TNF/IL13RA2/FCER2/C3/SUSD4/CFI/C7/IGHV3-53/IGHV3-66/IGKV1D-39/C4B/IGHD/C4BPA/TFRC/CR2/C4A	21
BP	GO:0006720	isoprenoid metabolic process	16/672	143/18862	5.16004e-05	0.00163869	0.00133514	AKR1C3/UGT1A8/ADH1C/UGT1A7/ADH7/AKR1C1/CYP27C1/CYP2C18/CYP2W1/GPC3/GPC6/LPL/CYP26A1/ALDH1A3/GPIHBP1/ADH1B	16
BP	GO:0019731	antibacterial humoral response	10/672	61/18862	5.37873e-05	0.00169568	0.00138157	LTF/KLK7/PGC/FGA/DMBT1/RNASE7/SFTPD/PLA2G1B/KLK5/FGB	10
BP	GO:0060055	angiogenesis involved in wound healing	7/672	29/18862	5.55528e-05	0.00173578	0.00141424	TNF/ITGB3/SERPINE1/FOXC2/ETS1/NDNF/ALOX5	7
BP	GO:0050806	positive regulation of synaptic transmission	16/672	144/18862	5.61728e-05	0.00173578	0.00141424	HAP1/CCL2/TNF/AGER/ADORA1/RETN/NMU/MME/ADCY8/SYT12/SNAP25/NTRK2/NRGN/FAM107A/IGSF11/CALB1	16
BP	GO:0050714	positive regulation of protein secretion	15/672	129/18862	5.62824e-05	0.00173578	0.00141424	FGA/VEGFC/FGG/KCNN4/ANKRD1/CAMK2N1/NMU/GPR68/ADCY8/UCN3/PLA2G1B/NR0B2/ADAM8/FGB/IL1A	15
BP	GO:0009306	protein secretion	29/672	367/18862	5.6667e-05	0.00173578	0.00141424	CACNA2D2/TNF/FGA/VEGFC/SAA1/FGG/KCNN4/ANKRD1/COMP/ADRA2A/CAMK2N1/NMU/FOXA2/SYT7/GPR68/ADCY8/UCN3/PLA2G1B/SNAP25/SNCG/NOS2/TFAP2B/KRT20/NR0B2/ADAM8/DPP4/ALOX5/FGB/IL1A	29
BP	GO:0035592	establishment of protein localization to extracellular region	29/672	368/18862	5.94901e-05	0.0017883	0.00145704	CACNA2D2/TNF/FGA/VEGFC/SAA1/FGG/KCNN4/ANKRD1/COMP/ADRA2A/CAMK2N1/NMU/FOXA2/SYT7/GPR68/ADCY8/UCN3/PLA2G1B/SNAP25/SNCG/NOS2/TFAP2B/KRT20/NR0B2/ADAM8/DPP4/ALOX5/FGB/IL1A	29
BP	GO:0001704	formation of primary germ layer	14/672	115/18862	5.96033e-05	0.0017883	0.00145704	SOX2/FN1/SNAI1/MMP2/VTN/ITGB3/COL8A1/ITGA3/DUSP4/FGFR2/COL5A1/ATOH8/FOXC2/INHBA	14
BP	GO:0051047	positive regulation of secretion	25/672	295/18862	5.96238e-05	0.0017883	0.00145704	GRP/FGA/VEGFC/FGG/KCNN4/ANKRD1/CAMK2N1/ADORA1/RETN/NMU/SYT7/GPR68/ADCY8/UCN3/PLA2G1B/CPB2/AGTR2/INHBA/NR0B2/UNC13D/ADAM8/AQP1/P2RY1/FGB/IL1A	25
BP	GO:0071219	cellular response to molecule of bacterial origin	20/672	209/18862	6.11329e-05	0.00180845	0.00147345	CSF2/LTF/CCL2/TNF/PPBP/IL24/MRC1/NLRP7/ANKRD1/SERPINE1/NLRP3/CSF3/CXCL5/CXCL11/CXCL13/NOS2/ICAM1/LBP/CXCL2/IL1A	20
BP	GO:0090276	regulation of peptide hormone secretion	20/672	209/18862	6.11329e-05	0.00180845	0.00147345	GRP/CACNA2D2/TNF/FGA/FGG/ADRA2A/CAMK2N1/NMU/FOXA2/SYT7/GPR68/ADCY8/UCN3/SNAP25/NOS2/TFAP2B/NR0B2/DPP4/ALOX5/FGB	20
BP	GO:0019724	B cell mediated immunity	21/672	226/18862	6.20001e-05	0.00182162	0.00148418	IGLL1/IGKV1-39/IGHV3-13/IGKV2D-28/IGHV3-38/TNF/IL13RA2/FCER2/C3/SUSD4/CFI/C7/IGHV3-53/IGHV3-66/IGKV1D-39/C4B/IGHD/C4BPA/TFRC/CR2/C4A	21
BP	GO:0072073	kidney epithelium development	15/672	131/18862	6.72919e-05	0.00196374	0.00159998	IRX1/WNT6/CRLF1/ADAMTS16/AGT/FGFR2/EPHA7/GPC3/FOXC2/WNK4/LIF/TFAP2B/AGTR2/TCF21/CALB1	15
BP	GO:0001501	skeletal system development	35/672	486/18862	6.83302e-05	0.00198066	0.00161376	CCN1/CHRDL2/LTF/PTH1R/WNT7A/FST/SNAI1/MMP2/MGP/COL3A1/BMP5/ITGB6/CHST11/TGFBI/LOXL2/HHIP/COMP/ADAMTS4/HOXB5/GPR68/FGFR2/COL1A1/COL1A2/PITX1/MMP13/FOXC2/THPO/FBN2/TIMP1/DMRT2/BMP3/ARSL/SP5/PAX5/CLDN18	35
BP	GO:0045926	negative regulation of growth	22/672	245/18862	6.97875e-05	0.00200942	0.00163719	MT1H/CYP27B1/SEMA6D/MT1A/SEMA3E/NKD1/KCNK2/DCC/SEMA3A/MT1E/CDA/EPHA7/MT1M/GPC3/MT2A/PLAC8/SEMA3B/AGTR2/INHBA/SLIT3/MEG3/FBP1	22
BP	GO:1903034	regulation of response to wounding	17/672	164/18862	8.02267e-05	0.0022947	0.00186963	SERPINB2/TNFRSF12A/TNF/FGA/FGG/VTN/SERPINE1/ADRA2A/FOXA2/CLDN3/FOXC2/CPB2/RGMA/FAP/PROC/ALOX5/FGB	17
BP	GO:0050819	negative regulation of coagulation	9/672	52/18862	8.17622e-05	0.00230197	0.00187555	SERPINB2/FGA/FGG/VTN/SERPINE1/CPB2/FAP/PROC/FGB	9
BP	GO:0050922	negative regulation of chemotaxis	10/672	64/18862	8.20799e-05	0.00230197	0.00187555	PADI2/SEMA6D/CCL2/SEMA3E/SEMA3A/C5AR2/CXCL13/SEMA3B/MMP28/DPP4	10
BP	GO:0072577	endothelial cell apoptotic process	10/672	64/18862	8.20799e-05	0.00230197	0.00187555	AKR1C3/CCL2/TNF/FGA/FGG/SERPINE1/COL4A3/ICAM1/NDNF/FGB	10
BP	GO:0070141	response to UV-A	5/672	14/18862	8.66118e-05	0.00240555	0.00195994	MMP2/MMP3/MME/MMP1/TIMP1	5
BP	GO:0120254	olefinic compound metabolic process	14/672	119/18862	8.68871e-05	0.00240555	0.00195994	AKR1C3/CBR1/BMP5/AKR1C2/PTGDS/CYP4F3/AKR1C1/CYP27C1/CYP2C18/GSTA1/CYP4F11/ALDH1A3/GSTM2/ALOX5	14
BP	GO:0002922	positive regulation of humoral immune response	6/672	22/18862	9.15213e-05	0.00250178	0.00203835	KLK7/PGC/TNF/FCER2/C3/KLK5	6
BP	GO:0006067	ethanol metabolic process	6/672	22/18862	9.15213e-05	0.00250178	0.00203835	ADH1C/ALDH3B1/ADH7/SULT1A2/ADH1B/SULT1C4	6
BP	GO:0007585	respiratory gaseous exchange by respiratory system	10/672	65/18862	9.39512e-05	0.00255204	0.0020793	SFTPA1/CCBE1/CHST11/TNNC1/SFTPA2/TMPRSS11D/SFTPB/SFTPD/ADORA1/SFTPC	10
BP	GO:0097305	response to alcohol	21/672	233/18862	9.60688e-05	0.00259326	0.00211288	AKR1C3/GRAMD1B/CCL7/PTGER2/AKR1C2/SLC6A3/NLRP3/CSF3/ADH7/FOSB/FGFR2/ADCY8/UCN3/CLDN3/KLF2/INHBA/NR0B2/SLIT3/ICAM1/CLDN18/CCL21	21
BP	GO:0071241	cellular response to inorganic substance	20/672	216/18862	9.66747e-05	0.0025934	0.002113	AKR1C3/MT1H/MT1A/MT1E/KCNK3/DPEP1/MMP3/FOSB/SYT7/RASGRP2/ADCY8/SYT12/MT1M/FSTL3/MT2A/GUCA1A/LRRK2/AQP1/FBP1/AOC1	20
BP	GO:0022407	regulation of cell-cell adhesion	32/672	437/18862	0.000101939	0.00271775	0.00221431	FGL1/SOX2/MYADM/ADAM19/CCL2/EBI3/TNF/FGA/FGG/AGER/NLRP3/SFTPD/FOXA2/CEACAM6/EPHA7/FSTL3/MEGF10/CXCL13/SELE/TFRC/ADAM8/VSIG4/ICAM1/ETS1/NR4A3/DPP4/ALOX5/TNFSF18/MUC21/CCL21/FGB/IL1A	32
BP	GO:0031349	positive regulation of defense response	28/672	361/18862	0.000104201	0.00274425	0.0022359	EREG/PLA2G2A/KLK7/MUC16/PGC/TNF/C3/SERPINE1/TGM2/PDE2A/FCN1/AGT/PLA2G5/MUC1/IL1RL1/MUC5B/LPL/KLK5/LRRK2/C2CD4B/TSLP/ADAM8/ETS1/COCH/MUC13/TNFSF18/LBP/MUC21	28
BP	GO:0010811	positive regulation of cell-substrate adhesion	14/672	121/18862	0.000104204	0.00274425	0.0022359	CCN1/MYADM/FN1/OLFM4/FGA/FGG/COL8A1/ITGA3/CEACAM6/EMILIN1/UNC13D/NDNF/CCL21/FGB	14
BP	GO:0001885	endothelial cell development	10/672	66/18862	0.000107245	0.0027736	0.00225982	WNT7A/MYADM/TNF/ARHGEF26/TJP3/GSTM3/PDE2A/CLDN3/PROC/ICAM1	10
BP	GO:0030193	regulation of blood coagulation	10/672	66/18862	0.000107245	0.0027736	0.00225982	SERPINB2/FGA/FGG/VTN/SERPINE1/FOXA2/CPB2/FAP/PROC/FGB	10
BP	GO:0072678	T cell migration	10/672	66/18862	0.000107245	0.0027736	0.00225982	S1PR1/C10orf99/CCL2/CXCL11/GPR15/MYO1G/CXCL13/ADAM8/ICAM1/CCL21	10
BP	GO:0032496	response to lipopolysaccharide	26/672	326/18862	0.000116467	0.00299418	0.00243954	CSF2/LTF/CYP27B1/CPS1/CCL2/TNF/PPBP/IL24/MRC1/NLRP7/ANKRD1/SERPINE1/PALM3/NLRP3/CSF3/CXCL5/CXCL11/FGFR2/CXCL13/NOS2/SELE/AKAP12/ICAM1/LBP/CXCL2/IL1A	26
BP	GO:0016338	calcium-independent cell-cell adhesion via plasma membrane cell-adhesion molecules	6/672	23/18862	0.000120112	0.00305156	0.00248629	CLDN2/CLDN3/CLDN20/CLDN9/CLDN6/CLDN18	6
BP	GO:0031639	plasminogen activation	6/672	23/18862	0.000120112	0.00305156	0.00248629	FGA/FGG/SERPINE1/CLEC3B/CPB2/FGB	6
BP	GO:0034308	primary alcohol metabolic process	12/672	94/18862	0.000125158	0.00314856	0.00256532	AKR1C3/ADH1C/ALDH3B1/BMP5/AKR1C2/ADH7/AKR1C1/CYP27C1/SULT1A2/ALDH1A3/ADH1B/SULT1C4	12
BP	GO:0010273	detoxification of copper ion	5/672	15/18862	0.000126117	0.00314856	0.00256532	MT1H/MT1A/MT1E/MT1M/MT2A	5
BP	GO:1990169	stress response to copper ion	5/672	15/18862	0.000126117	0.00314856	0.00256532	MT1H/MT1A/MT1E/MT1M/MT2A	5
BP	GO:0010469	regulation of signaling receptor activity	18/672	188/18862	0.000139619	0.00346559	0.00282362	EREG/CCL2/NPTX2/TNF/ERRFI1/SERPINE1/LY6H/ADH7/ADRA2A/ADORA1/CGA/GPRC5A/ADRA2B/AREG/RASGRF1/AGTR2/NPTX1/P2RY1	18
BP	GO:0061138	morphogenesis of a branching epithelium	17/672	173/18862	0.000154933	0.00381234	0.00310615	TNF/SEMA3E/WNT6/SEMA3A/ADAMTS16/RSPO3/HHIP/PROX1/TGM2/AGT/FGFR2/NKX2-1/GPC3/FOXC2/AGTR2/TCF21/HGF	17
BP	GO:0071294	cellular response to zinc ion	6/672	24/18862	0.000155354	0.00381234	0.00310615	MT1H/MT1A/MT1E/KCNK3/MT1M/MT2A	6
BP	GO:0016485	protein processing	20/672	224/18862	0.000158728	0.00385138	0.00313795	CPM/CCBE1/ADAM19/CTSE/FGA/NLRP7/FGG/SERPINE1/PCSK1/COMP/KLK6/CGA/MME/CLEC3B/CPB2/SPON1/LRRK2/SCG5/ADAM8/FGB	20
BP	GO:0050920	regulation of chemotaxis	20/672	224/18862	0.000158728	0.00385138	0.00313795	PADI2/S1PR1/SEMA6D/CCL2/CCL7/SEMA3E/VEGFC/AGER/SEMA3A/C5AR2/SERPINE1/CXCL13/CSF1R/SEMA3B/MMP28/ARTN/DPP4/TNFSF18/LBP/CCL21	20
BP	GO:0002064	epithelial cell development	19/672	207/18862	0.000160625	0.00386862	0.003152	ROS1/SPDEF/WNT7A/INSM1/MYADM/TNF/BMP5/ARHGEF26/TJP3/GSTM3/PROX1/POF1B/SLC9A4/PDE2A/ADAMTSL4/CLDN3/FOXC2/PROC/ICAM1	19
BP	GO:0071675	regulation of mononuclear cell migration	13/672	111/18862	0.00016123	0.00386862	0.003152	PADI2/C10orf99/CCL2/CCL7/TNF/BMP5/AGER/SERPINE1/CXCL13/CSF1R/ADAM8/TNFSF18/CCL21	13
BP	GO:1900271	regulation of long-term synaptic potentiation	8/672	45/18862	0.000167029	0.00398562	0.00324732	AGER/ADORA1/MME/ADCY8/NRGN/FAM107A/IGSF11/CALB1	8
BP	GO:0060291	long-term synaptic potentiation	11/672	83/18862	0.00016954	0.00402332	0.00327804	AGER/ADORA1/MME/ADCY8/SYT12/SNAP25/NTRK2/NRGN/FAM107A/IGSF11/CALB1	11
BP	GO:0010043	response to zinc ion	9/672	57/18862	0.000170638	0.00402725	0.00328124	MT1H/CPS1/CRIP1/MT1A/MT1E/KCNK3/MT1M/MT2A/PLN	9
BP	GO:0034310	primary alcohol catabolic process	5/672	16/18862	0.000178082	0.00418009	0.00340577	AKR1C3/ALDH3B1/ADH7/SULT1A2/SULT1C4	5
BP	GO:2000351	regulation of endothelial cell apoptotic process	9/672	58/18862	0.000195687	0.0045685	0.00372223	AKR1C3/CCL2/TNF/FGA/FGG/SERPINE1/ICAM1/NDNF/FGB	9
BP	GO:0045745	positive regulation of G protein-coupled receptor signaling pathway	6/672	25/18862	0.000198295	0.00459641	0.00374497	GRP/C3/NECAB2/KLK6/KLK5/MRAP2	6
BP	GO:0021536	diencephalon development	10/672	71/18862	0.000200075	0.00459641	0.00374497	HAP1/SOX2/SEMA3A/SLC6A3/OTX1/PITX1/NKX2-1/CNTNAP2/ETS1/NDNF	10
BP	GO:0050818	regulation of coagulation	10/672	71/18862	0.000200075	0.00459641	0.00374497	SERPINB2/FGA/FGG/VTN/SERPINE1/FOXA2/CPB2/FAP/PROC/FGB	10
BP	GO:0030900	forebrain development	27/672	357/18862	0.000207624	0.00474459	0.0038657	HAP1/SOX2/FEZF1/WNT7A/COL3A1/SEMA3A/SLC6A3/NEUROG3/PROX1/DLC1/OTX1/OTX2/FGFR2/PITX1/NKX2-1/NTRK2/APLP1/CSF1R/NRGN/LRRK2/INHBA/ALDH1A3/CNTNAP2/AQP1/ETS1/NDNF/PAX5	27
BP	GO:0007178	transmembrane receptor protein serine/threonine kinase signaling pathway	27/672	358/18862	0.00021719	0.00493707	0.00402253	CCN1/VEPH1/FST/PMEPA1/COL3A1/BMP5/ITGB6/TMEM100/CHST11/FOLR1/COMP/ITGA3/COL1A2/CILP/NKX2-1/GPC3/VASN/ATOH8/FSTL3/FBN2/TFAP2B/EMILIN1/BMP3/INHBA/RGMA/SOST/SOSTDC1	27
BP	GO:0006766	vitamin metabolic process	14/672	130/18862	0.000224409	0.0050588	0.00412171	AKR1C3/CBR1/SLC52A1/CYP27B1/SNAI1/TNF/MCCC1/FOLR1/CYP4F3/CYP2W1/PRSS1/CYP24A1/CYP26A1/CYP4F11	14
BP	GO:0007160	cell-matrix adhesion	20/672	230/18862	0.000226059	0.0050588	0.00412171	FN1/MSLN/SEMA3E/COL3A1/FGA/ITGB6/FGG/VTN/ITGB3/SERPINE1/ITGA3/DLC1/CEACAM6/COL5A3/L1CAM/ITGBL1/EMILIN1/FAM107A/CCL21/FGB	20
BP	GO:0007188	adenylate cyclase-modulating G protein-coupled receptor signaling pathway	20/672	230/18862	0.000226059	0.0050588	0.00412171	S1PR1/ADGRE1/PTH1R/PTGER2/HTR1D/ADRA2A/PDE2A/ADORA1/CXCL11/GNA14/MARCO/ADCY8/UCN3/ADRA2B/APLP1/SCTR/MRAP2/AKAP12/P2RY1/PLN	20
BP	GO:0006691	leukotriene metabolic process	7/672	36/18862	0.000239239	0.00532614	0.00433953	DPEP1/CYP4F3/PLA2G5/PLA2G1B/GGTLC1/CYP4F11/ALOX5	7
BP	GO:0030322	stabilization of membrane potential	5/672	17/18862	0.000244916	0.0053969	0.00439718	KCNK17/KCNK5/KCNK2/KCNN4/KCNK3	5
BP	GO:0061687	detoxification of inorganic compound	5/672	17/18862	0.000244916	0.0053969	0.00439718	MT1H/MT1A/MT1E/MT1M/MT2A	5
BP	GO:0072503	cellular divalent inorganic cation homeostasis	33/672	480/18862	0.000257958	0.00565544	0.00460783	HAP1/MT1H/S1PR1/PTH1R/CCL7/PTGER2/MT1A/SAA1/ATP2A3/MT1E/P2RY6/C5AR2/KCNK3/SLC35G1/CCL13/CCL23/TGM2/ADORA1/CXCL11/NMU/NPSR1/ADCY8/PLA2G1B/MT1M/MT2A/CXCL13/ATP13A5/SLC39A8/GSTM2/P2RY1/PLN/CALB1/CCL21	33
BP	GO:0033628	regulation of cell adhesion mediated by integrin	8/672	48/18862	0.000266183	0.00575828	0.00469161	SERPINE1/MUC1/FOXC2/CXCL13/LIF/DPP4/CCL21/TESC	8
BP	GO:0061028	establishment of endothelial barrier	8/672	48/18862	0.000266183	0.00575828	0.00469161	WNT7A/MYADM/TNF/TJP3/PDE2A/CLDN3/PROC/ICAM1	8
BP	GO:0006575	cellular modified amino acid metabolic process	18/672	198/18862	0.000266649	0.00575828	0.00469161	GSTM1/PLA2G2A/FOXE1/FOLR1/GSTM3/GSTA4/DPEP1/BHMT2/CGA/PLA2G5/PLA2G1B/ABHD12B/GSTA1/SLC5A5/CLIC5/GGTLC1/CKM/GSTM2	18
BP	GO:0071216	cellular response to biotic stimulus	20/672	233/18862	0.000268279	0.00576467	0.00469682	CSF2/LTF/CCL2/TNF/PPBP/IL24/MRC1/NLRP7/ANKRD1/SERPINE1/NLRP3/CSF3/CXCL5/CXCL11/CXCL13/NOS2/ICAM1/LBP/CXCL2/IL1A	20
BP	GO:0030656	regulation of vitamin metabolic process	4/672	10/18862	0.000282433	0.00603874	0.00492012	AKR1C3/CYP27B1/SNAI1/TNF	4
BP	GO:0060993	kidney morphogenesis	11/672	88/18862	0.000286301	0.00606144	0.00493862	IRX1/WNT6/ADAMTS16/AGT/GPC3/WNK4/LIF/LRRK2/AGTR2/TCF21/CALB1	11
BP	GO:0072080	nephron tubule development	11/672	88/18862	0.000286301	0.00606144	0.00493862	IRX1/WNT6/ADAMTS16/AGT/GPC3/WNK4/LIF/TFAP2B/AGTR2/TCF21/CALB1	11
BP	GO:1903532	positive regulation of secretion by cell	22/672	271/18862	0.000297932	0.00627693	0.00511419	GRP/FGA/VEGFC/FGG/KCNN4/ANKRD1/CAMK2N1/RETN/NMU/SYT7/GPR68/ADCY8/UCN3/PLA2G1B/CPB2/INHBA/NR0B2/UNC13D/ADAM8/P2RY1/FGB/IL1A	22
BP	GO:0048608	reproductive structure development	29/672	405/18862	0.000308899	0.0064225	0.00523279	AKR1C3/GAS2/CCN1/CSF2/EREG/CYP27B1/WNT7A/ADAM19/FST/SNAI1/CRIP1/BMP5/C3/SEMA3A/ARRB1/RSPO3/RETN/MME/FGFR2/NKX2-1/FSTL3/LIF/INHBA/ZFP42/SLIT3/ICAM1/TCF21/MMP19/TESC	29
BP	GO:0050727	regulation of inflammatory response	27/672	366/18862	0.000308935	0.0064225	0.00523279	PLA2G2A/TNF/SAA1/C3/AGER/SERPINE1/NLRP3/SMPDL3B/TGM2/MMP3/PDE2A/ADORA1/AGT/IL1RL1/LPL/SELE/LRRK2/C2CD4B/NT5E/TSLP/ADAM8/PROC/HGF/ETS1/ALOX5/TNFSF18/LBP	27
BP	GO:0007263	nitric oxide mediated signal transduction	6/672	27/18862	0.000311916	0.0064225	0.00523279	RASD1/SPINK1/AGT/NOS2/AGTR2/NDNF	6
BP	GO:0031069	hair follicle morphogenesis	6/672	27/18862	0.000311916	0.0064225	0.00523279	FOXE1/FST/SNAI1/FGFR2/TGM3/SOSTDC1	6
BP	GO:0010810	regulation of cell-substrate adhesion	19/672	218/18862	0.000312277	0.0064225	0.00523279	CCN1/MYADM/FN1/OLFM4/SEMA3E/FGA/FGG/SERPINE1/COL8A1/ITGA3/DLC1/CEACAM6/COL1A1/EMILIN1/UNC13D/FAM107A/NDNF/CCL21/FGB	19
BP	GO:0002688	regulation of leukocyte chemotaxis	13/672	119/18862	0.000323433	0.0066204	0.00539404	PADI2/CCL2/CCL7/VEGFC/C5AR2/SERPINE1/CXCL13/CSF1R/MMP28/DPP4/TNFSF18/LBP/CCL21	13
BP	GO:0042698	ovulation cycle	9/672	62/18862	0.0003285	0.00664442	0.0054136	GAS2/EREG/ARRB1/MMP7/RETN/INHBA/SLIT3/ETS1/MMP19	9
BP	GO:0002523	leukocyte migration involved in inflammatory response	5/672	18/18862	0.000329221	0.00664442	0.0054136	NLRP3/SELE/ADAM8/ALOX5/LBP	5
BP	GO:0097501	stress response to metal ion	5/672	18/18862	0.000329221	0.00664442	0.0054136	MT1H/MT1A/MT1E/MT1M/MT2A	5
BP	GO:0009595	detection of biotic stimulus	7/672	38/18862	0.000340029	0.006799	0.00553955	DMBT1/NLRP3/PGLYRP3/SSC5D/C4B/FAP/LBP	7
BP	GO:0048286	lung alveolus development	7/672	38/18862	0.000340029	0.006799	0.00553955	ITGB6/ERRFI1/SFTPD/FGFR2/NKX2-1/LIF/TCF21	7
BP	GO:0030336	negative regulation of cell migration	25/672	330/18862	0.000343278	0.00683235	0.00556672	PADI2/SEMA6D/CCL2/TNF/MEOX2/COL3A1/IL24/BMP5/HAS1/SEMA3A/C5AR2/SERPINE1/DLC1/DPEP1/ADORA1/CLDN3/NKX2-1/CXCL13/TIMP1/EMILIN1/AGTR2/PTPRT/MMP28/DPP4/CCL21	25
BP	GO:0061458	reproductive system development	29/672	408/18862	0.000348822	0.00688351	0.00560841	AKR1C3/GAS2/CCN1/CSF2/EREG/CYP27B1/WNT7A/ADAM19/FST/SNAI1/CRIP1/BMP5/C3/SEMA3A/ARRB1/RSPO3/RETN/MME/FGFR2/NKX2-1/FSTL3/LIF/INHBA/ZFP42/SLIT3/ICAM1/TCF21/MMP19/TESC	29
BP	GO:0061326	renal tubule development	11/672	90/18862	0.000349037	0.00688351	0.00560841	IRX1/WNT6/ADAMTS16/AGT/GPC3/WNK4/LIF/TFAP2B/AGTR2/TCF21/CALB1	11
BP	GO:0001676	long-chain fatty acid metabolic process	13/672	120/18862	0.000351161	0.00689393	0.0056169	AKR1C3/CBR1/GSTM1/ACSM3/GLYATL2/PTGDS/CYP4F3/ACSL5/CYP2C18/GSTA1/CYP4F11/GSTM2/ALOX5	13
BP	GO:0034754	cellular hormone metabolic process	14/672	136/18862	0.000358876	0.0070135	0.00571432	AKR1C3/UGT1A8/ADH1C/BMP5/UGT1A7/AKR1C2/ADH7/AKR1C1/CYP27C1/CYP2C18/CYP2W1/CYP26A1/ALDH1A3/ADH1B	14
BP	GO:0072009	nephron epithelium development	12/672	106/18862	0.000391515	0.00760373	0.00619521	IRX1/WNT6/ADAMTS16/AGT/GPC3/FOXC2/WNK4/LIF/TFAP2B/AGTR2/TCF21/CALB1	12
BP	GO:1901616	organic hydroxy compound catabolic process	10/672	77/18862	0.000392598	0.00760373	0.00619521	AKR1C3/CYP27B1/ALDH3B1/SLC6A3/ADH7/CYP4F3/CYP24A1/CYP4F11/SULT1A2/SULT1C4	10
BP	GO:0046850	regulation of bone remodeling	8/672	51/18862	0.000408952	0.0078851	0.00642446	S1PR1/ITGB3/PDK4/SYT7/CSF1R/TFRC/ADAM8/CLDN18	8
BP	GO:0007586	digestion	14/672	138/18862	0.000416834	0.00796596	0.00649034	PGC/KCNN4/AKR1C2/ADRA2A/SLC9A4/AKR1C1/NMU/UCN3/PRSS1/WNK4/CAPN8/PRSS2/AQP1/MUC13	14
BP	GO:0072006	nephron development	14/672	138/18862	0.000416834	0.00796596	0.00649034	IRX1/WNT6/ADAMTS16/COL4A3/ITGA3/AGT/GPC3/FOXC2/WNK4/LIF/TFAP2B/AGTR2/TCF21/CALB1	14
BP	GO:0001894	tissue homeostasis	21/672	260/18862	0.000433544	0.00818114	0.00666566	ABCA3/LTF/S1PR1/PTH1R/ITGB6/ITGB3/PDK4/TJP3/SFTPD/ADGRF5/CLDN3/USH1G/CSF1R/LPCAT1/NAPSA/TFRC/ADAM8/SLC39A8/CLDN18/MUC13/PIGR	21
BP	GO:0002689	negative regulation of leukocyte chemotaxis	5/672	19/18862	0.000433776	0.00818114	0.00666566	PADI2/CCL2/C5AR2/MMP28/DPP4	5
BP	GO:0010744	positive regulation of macrophage derived foam cell differentiation	5/672	19/18862	0.000433776	0.00818114	0.00666566	CSF2/PLA2G2A/AGT/PLA2G5/LPL	5
BP	GO:0055074	calcium ion homeostasis	31/672	454/18862	0.000440861	0.00827861	0.00674508	HAP1/S1PR1/PTH1R/CYP27B1/CCL7/PTGER2/SAA1/ATP2A3/P2RY6/C5AR2/KCNK3/SLC35G1/CCL13/CCL23/TGM2/CAMK2N1/FAM20A/ADORA1/CXCL11/NMU/NPSR1/ADCY8/PLA2G1B/CXCL13/TFAP2B/ATP13A5/GSTM2/P2RY1/PLN/CALB1/CCL21	31
BP	GO:0001822	kidney development	22/672	280/18862	0.00046692	0.00872999	0.00711284	IRX1/WNT6/CRLF1/ADAMTS16/PROX1/COL4A3/ITGA3/AGT/MME/FGFR2/EPHA7/GPC3/FSTL3/FOXC2/WNK4/LIF/TFAP2B/CYP26A1/LRRK2/AGTR2/TCF21/CALB1	22
BP	GO:0046718	viral entry into host cell	14/672	140/18862	0.000482596	0.00892961	0.00727549	SLC52A1/MRC1/ITGB6/ITGB3/FCN1/GPR15/CIITA/TFRC/CLDN9/CLDN6/ICAM1/CR2/DPP4/FCN3	14
BP	GO:0046887	positive regulation of hormone secretion	13/672	124/18862	0.000483222	0.00892961	0.00727549	GRP/FGA/FGG/CAMK2N1/RETN/NMU/GPR68/ADCY8/UCN3/INHBA/NR0B2/P2RY1/FGB	13
BP	GO:0042310	vasoconstriction	10/672	79/18862	0.000483799	0.00892961	0.00727549	GJA5/HTR1D/FGA/FGG/COMP/ADRA2A/AGT/ADRA2B/ICAM1/FGB	10
BP	GO:0040013	negative regulation of locomotion	27/672	377/18862	0.000490431	0.0090135	0.00734383	PADI2/SEMA6D/CCL2/TNF/SEMA3E/MEOX2/COL3A1/IL24/BMP5/HAS1/SEMA3A/C5AR2/SERPINE1/DLC1/DPEP1/ADORA1/CLDN3/NKX2-1/CXCL13/TIMP1/EMILIN1/SEMA3B/AGTR2/PTPRT/MMP28/DPP4/CCL21	27
BP	GO:0030168	platelet activation	15/672	157/18862	0.000501253	0.00917335	0.00747408	FN1/COL3A1/FGA/SAA1/FGG/ITGB3/ARRB1/COMP/ADRA2A/GNA14/COL1A1/COL1A2/ADRA2B/P2RY1/FGB	15
BP	GO:0002446	neutrophil mediated immunity	33/672	499/18862	0.000513637	0.00936034	0.00762643	PADI2/LTF/ORM2/MCEMP1/OLFM4/RNASE2/PPBP/ALDH3B1/C3/QPCT/CDA/ORM1/RETN/FCN1/SERPINB12/FCGR2A/FOLR3/MME/CEACAM6/OLR1/PLA2G1B/SNAP25/PLAC8/LPCAT1/CD93/PRSS2/CRISPLD2/UNC13D/ADAM8/AOC1/ALOX5/PIGR/SERPINA1	33
BP	GO:0042119	neutrophil activation	33/672	500/18862	0.000531832	0.00965118	0.00786339	PADI2/LTF/ORM2/PLA2G2A/MCEMP1/OLFM4/RNASE2/PPBP/ALDH3B1/C3/QPCT/CDA/ORM1/RETN/FCN1/SERPINB12/FCGR2A/FOLR3/MME/CEACAM6/OLR1/SNAP25/PLAC8/LPCAT1/CD93/PRSS2/CRISPLD2/UNC13D/ADAM8/AOC1/ALOX5/PIGR/SERPINA1	33
BP	GO:0001706	endoderm formation	8/672	53/18862	0.000534757	0.00966366	0.00787356	SOX2/FN1/MMP2/VTN/COL8A1/DUSP4/COL5A1/INHBA	8
BP	GO:0002449	lymphocyte mediated immunity	26/672	360/18862	0.00054614	0.00982825	0.00800766	IGLL1/IGKV1-39/IGHV3-13/IGKV2D-28/IGHV3-38/TNF/IL13RA2/FCER2/C3/SUSD4/AGER/NLRP3/CFI/C7/IGHV3-53/IGHV3-66/IGKV1D-39/MYO1G/C4B/IGHD/C4BPA/TFRC/UNC13D/ICAM1/CR2/C4A	26
BP	GO:1902042	negative regulation of extrinsic apoptotic signaling pathway via death domain receptors	7/672	41/18862	0.000552219	0.00989641	0.00806319	FGA/BMP5/FGG/SERPINE1/ICAM1/HGF/FGB	7
BP	GO:0060445	branching involved in salivary gland morphogenesis	5/672	20/18862	0.000561525	0.0100216	0.0081652	TNF/SEMA3A/TGM2/FGFR2/HGF	5
BP	GO:0030072	peptide hormone secretion	20/672	247/18862	0.000569819	0.0101128	0.0082395	GRP/CACNA2D2/TNF/FGA/FGG/ADRA2A/CAMK2N1/NMU/FOXA2/SYT7/GPR68/ADCY8/UCN3/SNAP25/NOS2/TFAP2B/NR0B2/DPP4/ALOX5/FGB	20
BP	GO:0007176	regulation of epidermal growth factor-activated receptor activity	6/672	30/18862	0.000571318	0.0101128	0.0082395	EREG/ERRFI1/ADRA2A/ADORA1/GPRC5A/AREG	6
BP	GO:0055078	sodium ion homeostasis	8/672	54/18862	0.000608468	0.0107264	0.00873945	ADORA1/AGT/C7/TMPRSS3/TFAP2B/AGTR2/SCN7A/IL1A	8
BP	GO:0002683	negative regulation of immune system process	28/672	403/18862	0.00062666	0.0109511	0.00892254	FGL1/PADI2/LTF/CCL2/TNF/IL13RA2/COL3A1/AMBP/BMP5/SUSD4/C5AR2/SFTPD/ADORA1/A2M/GPR68/ADGRF5/PGLYRP3/IL1RL1/FSTL3/EMILIN1/C4BPA/INHBA/MMP28/VSIG4/CLDN18/DPP4/TNFSF18/CCL21	28
BP	GO:0001867	complement activation, lectin pathway	4/672	12/18862	0.000628822	0.0109511	0.00892254	FCN1/A2M/MFAP4/FCN3	4
BP	GO:0032490	detection of molecule of bacterial origin	4/672	12/18862	0.000628822	0.0109511	0.00892254	DMBT1/SSC5D/C4B/LBP	4
BP	GO:0048762	mesenchymal cell differentiation	19/672	231/18862	0.000640689	0.011101	0.00904463	SEMA6D/FN1/SNAI1/SEMA3E/BMP5/TMEM100/SEMA3A/LOXL2/FOLR1/FOXA2/FGFR2/COL1A1/NKX2-1/VASN/FOXC2/SEMA3B/ZNF750/TCF21/HGF	19
BP	GO:0006509	membrane protein ectodomain proteolysis	7/672	42/18862	0.000642567	0.011101	0.00904463	ADAM19/TNF/MMP7/TIMP3/ADRA2A/TIMP1/ADAM8	7
BP	GO:0043312	neutrophil degranulation	32/672	485/18862	0.000645618	0.0111093	0.00905138	PADI2/LTF/ORM2/MCEMP1/OLFM4/RNASE2/PPBP/ALDH3B1/C3/QPCT/CDA/ORM1/RETN/FCN1/SERPINB12/FCGR2A/FOLR3/MME/CEACAM6/OLR1/SNAP25/PLAC8/LPCAT1/CD93/PRSS2/CRISPLD2/UNC13D/ADAM8/AOC1/ALOX5/PIGR/SERPINA1	32
BP	GO:2000146	negative regulation of cell motility	25/672	345/18862	0.000660126	0.0113138	0.00921805	PADI2/SEMA6D/CCL2/TNF/MEOX2/COL3A1/IL24/BMP5/HAS1/SEMA3A/C5AR2/SERPINE1/DLC1/DPEP1/ADORA1/CLDN3/NKX2-1/CXCL13/TIMP1/EMILIN1/AGTR2/PTPRT/MMP28/DPP4/CCL21	25
BP	GO:0072001	renal system development	22/672	288/18862	0.000682019	0.0116428	0.00948612	IRX1/WNT6/CRLF1/ADAMTS16/PROX1/COL4A3/ITGA3/AGT/MME/FGFR2/EPHA7/GPC3/FSTL3/FOXC2/WNK4/LIF/TFAP2B/CYP26A1/LRRK2/AGTR2/TCF21/CALB1	22
BP	GO:0048730	epidermis morphogenesis	6/672	31/18862	0.000687322	0.0116872	0.00952224	FOXE1/FST/SNAI1/FGFR2/TGM3/SOSTDC1	6
BP	GO:0071560	cellular response to transforming growth factor beta stimulus	20/672	251/18862	0.000697511	0.0117678	0.00958791	VEPH1/WNT7A/PMEPA1/COL3A1/ITGB6/CHST11/ANKRD1/FOLR1/ITGA3/PDE2A/CLEC3B/FGFR2/COL1A1/COL1A2/CILP/NKX2-1/VASN/PDE3A/FBN2/EMILIN1	20
BP	GO:0090092	regulation of transmembrane receptor protein serine/threonine kinase signaling pathway	20/672	251/18862	0.000697511	0.0117678	0.00958791	CCN1/VEPH1/FST/PMEPA1/BMP5/CHST11/FOLR1/ITGA3/CILP/NKX2-1/GPC3/VASN/FSTL3/FBN2/TFAP2B/EMILIN1/BMP3/INHBA/SOST/SOSTDC1	20
BP	GO:0035929	steroid hormone secretion	5/672	21/18862	0.000715559	0.0119411	0.00972915	RETN/POMC/AGT/AGTR2/INHBA	5
BP	GO:0061042	vascular wound healing	5/672	21/18862	0.000715559	0.0119411	0.00972915	TNF/SERPINE1/FOXC2/NDNF/ALOX5	5
BP	GO:0002283	neutrophil activation involved in immune response	32/672	488/18862	0.000716081	0.0119411	0.00972915	PADI2/LTF/ORM2/MCEMP1/OLFM4/RNASE2/PPBP/ALDH3B1/C3/QPCT/CDA/ORM1/RETN/FCN1/SERPINB12/FCGR2A/FOLR3/MME/CEACAM6/OLR1/SNAP25/PLAC8/LPCAT1/CD93/PRSS2/CRISPLD2/UNC13D/ADAM8/AOC1/ALOX5/PIGR/SERPINA1	32
BP	GO:0050830	defense response to Gram-positive bacterium	11/672	98/18862	0.000727505	0.012085	0.00984635	PLA2G2A/C10orf99/TNF/DMBT1/RNASE7/PGLYRP3/PLA2G1B/SSC5D/GBP6/TNFSF8/LBP	11
BP	GO:0072088	nephron epithelium morphogenesis	9/672	69/18862	0.000735828	0.0121764	0.00992085	IRX1/WNT6/ADAMTS16/AGT/GPC3/WNK4/LIF/AGTR2/TCF21	9
BP	GO:0060562	epithelial tube morphogenesis	23/672	309/18862	0.000743265	0.0122221	0.00995805	IRX1/TNF/SEMA3E/WNT6/BMP5/ADAMTS16/FOLR1/GRHL3/HHIP/PROX1/DLC1/AGT/FGFR2/MICAL2/EPHA7/NKX2-1/GPC3/FOXC2/CSF1R/WNK4/AGTR2/TCF21/SOSTDC1	23
BP	GO:0022602	ovulation cycle process	7/672	43/18862	0.000744248	0.0122221	0.00995805	GAS2/EREG/ARRB1/RETN/INHBA/SLIT3/MMP19	7
BP	GO:0046683	response to organophosphorus	13/672	130/18862	0.000758808	0.012414	0.0101144	CPS1/P2RY6/SLC6A3/PDE2A/AKR1C1/FOSB/COL1A1/PDE3A/SLC5A5/ALDH3A1/AQP1/P2RY1/MMP19	13
BP	GO:0097191	extrinsic apoptotic signaling pathway	18/672	217/18862	0.000797902	0.0130043	0.0105954	CSF2/TNFRSF12A/TNF/FGA/BMP5/FGG/DCC/SERPINE1/TIMP3/AGT/G0S2/PAK5/AGTR2/INHBA/ICAM1/HGF/FGB/IL1A	18
BP	GO:0010743	regulation of macrophage derived foam cell differentiation	6/672	32/18862	0.000820742	0.0132807	0.0108206	CSF2/PLA2G2A/ITGB3/AGT/PLA2G5/LPL	6
BP	GO:0033559	unsaturated fatty acid metabolic process	12/672	115/18862	0.00082101	0.0132807	0.0108206	AKR1C3/CBR1/GSTM1/AKR1C2/PTGDS/CYP4F3/AKR1C1/CYP2C18/GSTA1/CYP4F11/GSTM2/ALOX5	12
BP	GO:0035987	endodermal cell differentiation	7/672	44/18862	0.000858242	0.0137647	0.011215	SOX2/FN1/MMP2/VTN/COL8A1/COL5A1/INHBA	7
BP	GO:0045124	regulation of bone resorption	7/672	44/18862	0.000858242	0.0137647	0.011215	S1PR1/ITGB3/PDK4/CSF1R/TFRC/ADAM8/CLDN18	7
BP	GO:0045833	negative regulation of lipid metabolic process	11/672	100/18862	0.00086262	0.0137647	0.011215	AKR1C3/CYP27B1/UGT1A8/SNAI1/TNF/BMP5/PROX1/ADRA2A/ADORA1/LPCAT1/SIK1	11
BP	GO:0051271	negative regulation of cellular component movement	25/672	352/18862	0.000880162	0.0137647	0.011215	PADI2/SEMA6D/CCL2/TNF/MEOX2/COL3A1/IL24/BMP5/HAS1/SEMA3A/C5AR2/SERPINE1/DLC1/DPEP1/ADORA1/CLDN3/NKX2-1/CXCL13/TIMP1/EMILIN1/AGTR2/PTPRT/MMP28/DPP4/CCL21	25
BP	GO:0002921	negative regulation of humoral immune response	4/672	13/18862	0.000882805	0.0137647	0.011215	SUSD4/A2M/C4BPA/VSIG4	4
BP	GO:0002923	regulation of humoral immune response mediated by circulating immunoglobulin	4/672	13/18862	0.000882805	0.0137647	0.011215	TNF/FCER2/SUSD4/C4BPA	4
BP	GO:0006068	ethanol catabolic process	4/672	13/18862	0.000882805	0.0137647	0.011215	ALDH3B1/ADH7/SULT1A2/SULT1C4	4
BP	GO:0033604	negative regulation of catecholamine secretion	4/672	13/18862	0.000882805	0.0137647	0.011215	ADRA2A/ADRA2B/AGTR2/P2RY1	4
BP	GO:0045741	positive regulation of epidermal growth factor-activated receptor activity	4/672	13/18862	0.000882805	0.0137647	0.011215	EREG/ADRA2A/ADORA1/AREG	4
BP	GO:0061043	regulation of vascular wound healing	4/672	13/18862	0.000882805	0.0137647	0.011215	TNF/SERPINE1/FOXC2/ALOX5	4
BP	GO:1901685	glutathione derivative metabolic process	5/672	22/18862	0.000899099	0.0138686	0.0112996	GSTM1/GSTM3/GSTA4/GSTA1/GSTM2	5
BP	GO:1901687	glutathione derivative biosynthetic process	5/672	22/18862	0.000899099	0.0138686	0.0112996	GSTM1/GSTM3/GSTA4/GSTA1/GSTM2	5
BP	GO:1904996	positive regulation of leukocyte adhesion to vascular endothelial cell	5/672	22/18862	0.000899099	0.0138686	0.0112996	TNF/SELE/ICAM1/ETS1/ALOX5	5
BP	GO:0072028	nephron morphogenesis	9/672	71/18862	0.000907938	0.0139551	0.0113701	IRX1/WNT6/ADAMTS16/AGT/GPC3/WNK4/LIF/AGTR2/TCF21	9
BP	GO:0071559	response to transforming growth factor beta	20/672	257/18862	0.000935133	0.0143221	0.0116691	VEPH1/WNT7A/PMEPA1/COL3A1/ITGB6/CHST11/ANKRD1/FOLR1/ITGA3/PDE2A/CLEC3B/FGFR2/COL1A1/COL1A2/CILP/NKX2-1/VASN/PDE3A/FBN2/EMILIN1	20
BP	GO:0050890	cognition	21/672	276/18862	0.000940526	0.0143538	0.0116949	PTPRZ1/NPTX2/TNF/KCNK2/AGER/GABRA5/ITGA3/ADORA1/MME/AFF2/PAK5/ADCY8/SNAP25/NTRK2/NRGN/LRRN4/RASGRF1/FAM107A/CNTNAP2/S100B/CALB1	21
BP	GO:0001657	ureteric bud development	10/672	86/18862	0.000951918	0.0144765	0.0117949	WNT6/CRLF1/ADAMTS16/AGT/FGFR2/GPC3/FOXC2/AGTR2/TCF21/CALB1	10
BP	GO:0008360	regulation of cell shape	14/672	151/18862	0.00102397	0.0155177	0.0126432	GAS2/FN1/CCL2/CCL7/SEMA3E/ATP10A/CCL13/RND1/DLC1/RHOBTB2/CSF1R/ICAM1/COCH/P2RY1	14
BP	GO:0003014	renal system process	12/672	118/18862	0.00103148	0.0155768	0.0126913	AKR1C3/AQP4/GJA5/ITGA3/ADORA1/AGT/ADGRF5/ADCY8/WNK4/TFAP2B/AGTR2/AQP1	12
BP	GO:0072163	mesonephric epithelium development	10/672	87/18862	0.00104195	0.0156256	0.0127311	WNT6/CRLF1/ADAMTS16/AGT/FGFR2/GPC3/FOXC2/AGTR2/TCF21/CALB1	10
BP	GO:0072164	mesonephric tubule development	10/672	87/18862	0.00104195	0.0156256	0.0127311	WNT6/CRLF1/ADAMTS16/AGT/FGFR2/GPC3/FOXC2/AGTR2/TCF21/CALB1	10
BP	GO:0031960	response to corticosteroid	14/672	152/18862	0.00109187	0.0163175	0.0132949	AKR1C3/ABCA3/CPS1/TNF/ERRFI1/FOSB/COL1A1/UCN3/ALDH3A1/AGTR2/FAM107A/SLIT3/AQP1/ICAM1	14
BP	GO:2001237	negative regulation of extrinsic apoptotic signaling pathway	11/672	103/18862	0.00110375	0.0164383	0.0133933	CSF2/TNF/FGA/BMP5/FGG/SERPINE1/PAK5/ICAM1/HGF/FGB/IL1A	11
BP	GO:1902041	regulation of extrinsic apoptotic signaling pathway via death domain receptors	8/672	59/18862	0.00110966	0.0164429	0.013397	FGA/BMP5/FGG/SERPINE1/TIMP3/ICAM1/HGF/FGB	8
BP	GO:0051043	regulation of membrane protein ectodomain proteolysis	5/672	23/18862	0.00111548	0.0164429	0.013397	TNF/TIMP3/ADRA2A/TIMP1/ADAM8	5
BP	GO:0072677	eosinophil migration	5/672	23/18862	0.00111548	0.0164429	0.013397	CCL2/CCL7/CCL13/ADAM8/CCL21	5
BP	GO:2000352	negative regulation of endothelial cell apoptotic process	6/672	34/18862	0.00114669	0.0168455	0.013725	FGA/FGG/SERPINE1/ICAM1/NDNF/FGB	6
BP	GO:0042493	response to drug	25/672	359/18862	0.00116131	0.0169769	0.0138321	ABCA3/CPS1/VEGFC/KCNK3/ANKRD1/ARRB1/SLC6A3/ITGA3/DPEP1/NFATC2/CYP2C18/FOSB/COL1A1/CYP2W1/PDE3A/CPB2/LPL/NOS2/TFAP2B/ALDH3A1/TFRC/INHBA/NNMT/ICAM1/FBP1	25
BP	GO:0044409	entry into host	14/672	153/18862	0.0011635	0.0169769	0.0138321	SLC52A1/MRC1/ITGB6/ITGB3/FCN1/GPR15/CIITA/TFRC/CLDN9/CLDN6/ICAM1/CR2/DPP4/FCN3	14
BP	GO:0061448	connective tissue development	19/672	243/18862	0.00117423	0.0170757	0.0139126	CCN1/CHRDL2/PTH1R/WNT7A/RORC/SNAI1/CRIP1/MGP/BMP5/CHST11/TGFBI/LOXL2/COMP/COL1A1/PITX1/COL5A1/FOXC2/TIMP1/BMP3	19
BP	GO:0001655	urogenital system development	23/672	320/18862	0.00118875	0.017229	0.0140375	CRIP1/IRX1/WNT6/CRLF1/ADAMTS16/PROX1/COL4A3/ITGA3/AGT/MME/FGFR2/EPHA7/GPC3/FSTL3/FOXC2/WNK4/LIF/TFAP2B/CYP26A1/LRRK2/AGTR2/TCF21/CALB1	23
BP	GO:0034113	heterotypic cell-cell adhesion	8/672	60/18862	0.00124115	0.0179282	0.0146072	MYADM/TNF/FGA/FGG/AGER/ITGB3/CEACAM6/FGB	8
BP	GO:0071496	cellular response to external stimulus	22/672	303/18862	0.00132281	0.019044	0.0155163	AKR1C3/CYP27B1/DAPL1/PDK4/ANKRD1/MMP7/FOLR1/FOXA3/PDE2A/FOXA2/PIEZO2/COL1A1/UCN3/CYP24A1/LPL/KRT20/LRRK2/FAM107A/SIK1/AQP1/ICAM1/AOC1	22
BP	GO:0015874	norepinephrine transport	5/672	24/18862	0.00136815	0.0195664	0.0159419	SLC6A3/ADRA2A/ADRA2B/AGTR2/P2RY1	5
BP	GO:0098581	detection of external biotic stimulus	5/672	24/18862	0.00136815	0.0195664	0.0159419	DMBT1/PGLYRP3/SSC5D/C4B/LBP	5
BP	GO:0019229	regulation of vasoconstriction	8/672	61/18862	0.00138475	0.0196089	0.0159765	GJA5/FGA/FGG/ADRA2A/AGT/ADRA2B/ICAM1/FGB	8
BP	GO:0033619	membrane protein proteolysis	8/672	61/18862	0.00138475	0.0196089	0.0159765	ADAM19/TNF/MMP7/TIMP3/ADRA2A/TIMP1/NAPSA/ADAM8	8
BP	GO:0070613	regulation of protein processing	8/672	61/18862	0.00138475	0.0196089	0.0159765	CCBE1/NLRP7/SERPINE1/CLEC3B/CPB2/SPON1/LRRK2/ADAM8	8
BP	GO:0031669	cellular response to nutrient levels	17/672	210/18862	0.00143809	0.0202977	0.0165378	AKR1C3/CYP27B1/DAPL1/PDK4/FOLR1/FOXA3/FOXA2/COL1A1/UCN3/CYP24A1/LPL/KRT20/LRRK2/FAM107A/SIK1/ICAM1/AOC1	17
BP	GO:0006692	prostanoid metabolic process	7/672	48/18862	0.00145838	0.0203843	0.0166083	AKR1C3/CBR1/GSTM1/AKR1C2/PTGDS/AKR1C1/GSTA1	7
BP	GO:0006693	prostaglandin metabolic process	7/672	48/18862	0.00145838	0.0203843	0.0166083	AKR1C3/CBR1/GSTM1/AKR1C2/PTGDS/AKR1C1/GSTA1	7
BP	GO:2001238	positive regulation of extrinsic apoptotic signaling pathway	7/672	48/18862	0.00145838	0.0203843	0.0166083	TNFRSF12A/TNF/TIMP3/AGT/G0S2/AGTR2/INHBA	7
BP	GO:0002440	production of molecular mediator of immune response	21/672	286/18862	0.00146803	0.020453	0.0166643	IGKV1-39/IGLV9-49/IGKV2D-28/KLK7/PGC/TNF/IL13RA2/IGKV6D-21/NLRP3/IGKV2D-24/IGLV3-12/IGLV2-33/IGLV3-22/IGKV1D-39/IGKV1-27/KLK5/TFRC/IGKV3D-7/IGLV3-9/IGLV4-3/NR4A3	21
BP	GO:0001823	mesonephros development	10/672	91/18862	0.00147445	0.0204763	0.0166833	WNT6/CRLF1/ADAMTS16/AGT/FGFR2/GPC3/FOXC2/AGTR2/TCF21/CALB1	10
BP	GO:0007492	endoderm development	9/672	76/18862	0.00148415	0.0205451	0.0167393	SOX2/FN1/MMP2/VTN/COL8A1/DUSP4/COL5A1/NKX2-1/INHBA	9
BP	GO:0045453	bone resorption	8/672	62/18862	0.00154123	0.0212669	0.0173275	S1PR1/PTH1R/ITGB3/PDK4/CSF1R/TFRC/ADAM8/CLDN18	8
BP	GO:0050673	epithelial cell proliferation	28/672	428/18862	0.00155623	0.0214056	0.0174405	EREG/FGL1/SOX2/WNT7A/FST/CCL2/TNF/BMP5/VEGFC/ERRFI1/ITGB3/C5AR2/LOXL2/PROX1/COL4A3/COL8A1/KRT4/FGFR2/GPC3/ATOH8/CPB2/CRNN/FGFBP1/AREG/FAP/HGF/NR4A3/ALOX5	28
BP	GO:0014061	regulation of norepinephrine secretion	4/672	15/18862	0.00159225	0.0216256	0.0176197	ADRA2A/ADRA2B/AGTR2/P2RY1	4
BP	GO:0042574	retinal metabolic process	4/672	15/18862	0.00159225	0.0216256	0.0176197	AKR1C3/AKR1C1/CYP27C1/ALDH1A3	4
BP	GO:0051770	positive regulation of nitric-oxide synthase biosynthetic process	4/672	15/18862	0.00159225	0.0216256	0.0176197	CCL2/FCER2/LRRK2/AKAP12	4
BP	GO:2000095	regulation of Wnt signaling pathway, planar cell polarity pathway	4/672	15/18862	0.00159225	0.0216256	0.0176197	NKD1/RSPO3/GPC3/DACT1	4
BP	GO:0048167	regulation of synaptic plasticity	15/672	176/18862	0.00161768	0.0219021	0.0178449	AGER/ADORA1/SYT7/MME/ADCY8/SYT12/SNAP25/NTRK2/NRGN/SCTR/RASGRF1/FAM107A/SORCS2/IGSF11/CALB1	15
BP	GO:0006898	receptor-mediated endocytosis	23/672	328/18862	0.00164253	0.022169	0.0180624	IGKV1-39/IGHV3-13/COLEC12/IGKV2D-28/CD163/AMBP/MRC1/SAA1/C3/VTN/ITGB3/SERPINE1/ARRB1/FOLR1/NECAB2/SFTPD/IGHV3-53/MARCO/IGKV1D-39/SNAP25/SELE/TFRC/CCL21	23
BP	GO:0021879	forebrain neuron differentiation	7/672	49/18862	0.00165006	0.0222013	0.0180887	SEMA3A/PROX1/FGFR2/NKX2-1/CSF1R/INHBA/NDNF	7
BP	GO:0071677	positive regulation of mononuclear cell migration	8/672	63/18862	0.00171139	0.0228839	0.0186449	CCL7/TNF/AGER/SERPINE1/CXCL13/ADAM8/TNFSF18/CCL21	8
BP	GO:1903317	regulation of protein maturation	8/672	63/18862	0.00171139	0.0228839	0.0186449	CCBE1/NLRP7/SERPINE1/CLEC3B/CPB2/SPON1/LRRK2/ADAM8	8
BP	GO:0008585	female gonad development	10/672	93/18862	0.0017398	0.0231326	0.0188475	GAS2/EREG/FST/ARRB1/RETN/INHBA/ZFP42/SLIT3/ICAM1/MMP19	10
BP	GO:1903522	regulation of blood circulation	21/672	290/18862	0.0017407	0.0231326	0.0188475	CACNA2D2/GJA5/PTGER2/FGA/FGG/ATP2A3/AGER/SEMA3A/KCNK3/ADRA2A/ADORA1/AGT/NMU/ADRA2B/DES/CACNA2D3/AGTR2/ICAM1/GSTM2/PLN/FGB	21
BP	GO:0050796	regulation of insulin secretion	15/672	178/18862	0.00180869	0.0238437	0.0194269	CACNA2D2/TNF/ADRA2A/CAMK2N1/FOXA2/SYT7/GPR68/ADCY8/UCN3/SNAP25/NOS2/TFAP2B/NR0B2/DPP4/ALOX5	15
BP	GO:0002385	mucosal immune response	6/672	37/18862	0.00181078	0.0238437	0.0194269	LTF/RNASE2/PLA2G1B/RAB17/NOS2/PIGR	6
BP	GO:1904994	regulation of leukocyte adhesion to vascular endothelial cell	6/672	37/18862	0.00181078	0.0238437	0.0194269	TNF/SELE/ICAM1/ETS1/ALOX5/CCL21	6
BP	GO:0006631	fatty acid metabolic process	26/672	392/18862	0.00186347	0.024463	0.0199315	AKR1C3/CBR1/GSTM1/UGT1A8/ACSM3/C3/PDK4/AKR1C2/GLYATL2/PTGDS/ADH7/CYP4F3/ACSL5/AKR1C1/CYP2C18/PLA2G5/PLA2G1B/CYP24A1/ACOX2/GSTA1/LPL/CYP4F11/NR4A3/GSTM2/ALOX5/FADS6	26
BP	GO:1904035	regulation of epithelial cell apoptotic process	10/672	94/18862	0.00188627	0.0245919	0.0200365	AKR1C3/CCL2/TNF/FGA/FGG/SERPINE1/PLA2G1B/ICAM1/NDNF/FGB	10
BP	GO:0055067	monovalent inorganic cation homeostasis	14/672	161/18862	0.00189125	0.0245919	0.0200365	SLC4A4/ATP6V0A4/PDK4/SLC9A4/ADORA1/AGT/C7/TMPRSS3/TFAP2B/LRRK2/AGTR2/SCN7A/SLC9A2/IL1A	14
BP	GO:0006749	glutathione metabolic process	8/672	64/18862	0.00189607	0.0245919	0.0200365	GSTM1/GSTM3/GSTA4/DPEP1/GSTA1/CLIC5/GGTLC1/GSTM2	8
BP	GO:0032732	positive regulation of interleukin-1 production	8/672	64/18862	0.00189607	0.0245919	0.0200365	ORM2/TNF/SAA1/AGER/NLRP3/ORM1/LPL/IGHD	8
BP	GO:0098742	cell-cell adhesion via plasma-membrane adhesion molecules	20/672	273/18862	0.00193358	0.0250034	0.0203718	IGSF21/MYADM/CLDN2/AMIGO2/CDH6/VSTM2L/CEACAM6/CADM3/LRRC4/CLDN3/CLDN20/L1CAM/GPC6/SELE/CLDN9/PTPRT/CLDN6/ICAM1/CLDN18/IGSF11	20
BP	GO:0014074	response to purine-containing compound	13/672	144/18862	0.0019425	0.0250085	0.0203759	CPS1/P2RY6/SLC6A3/PDE2A/FOSB/COL1A1/PDE3A/SLC5A5/ALDH3A1/AQP1/GSTM2/P2RY1/MMP19	13
BP	GO:0015844	monoamine transport	9/672	79/18862	0.00195134	0.0250085	0.0203759	ITGB3/SLC6A3/ADRA2A/SYT7/SYT12/ADRA2B/SNCG/AGTR2/P2RY1	9
BP	GO:0070830	bicellular tight junction assembly	9/672	79/18862	0.00195134	0.0250085	0.0203759	SNAI1/TNF/CLDN2/POF1B/CLDN3/CLDN20/CLDN9/CLDN6/CLDN18	9
BP	GO:0007611	learning or memory	18/672	235/18862	0.00196418	0.0250985	0.0204493	PTPRZ1/NPTX2/KCNK2/AGER/GABRA5/ITGA3/MME/AFF2/PAK5/ADCY8/SNAP25/NTRK2/NRGN/LRRN4/RASGRF1/CNTNAP2/S100B/CALB1	18
BP	GO:0051604	protein maturation	21/672	293/18862	0.00197246	0.0251299	0.0204748	CPM/CCBE1/ADAM19/CTSE/FGA/NLRP7/FGG/SERPINE1/PCSK1/COMP/KLK6/CGA/MME/CLEC3B/CPB2/SPON1/LRRK2/SCG5/ADAM8/FGB/TESC	21
BP	GO:0002377	immunoglobulin production	16/672	198/18862	0.00199513	0.0252126	0.0205422	IGKV1-39/IGLV9-49/IGKV2D-28/TNF/IL13RA2/IGKV6D-21/IGKV2D-24/IGLV3-12/IGLV2-33/IGLV3-22/IGKV1D-39/IGKV1-27/TFRC/IGKV3D-7/IGLV3-9/IGLV4-3	16
BP	GO:0051953	negative regulation of amine transport	5/672	26/18862	0.00199646	0.0252126	0.0205422	ADRA2A/ADORA1/ADRA2B/AGTR2/P2RY1	5
BP	GO:1901623	regulation of lymphocyte chemotaxis	5/672	26/18862	0.00199646	0.0252126	0.0205422	PADI2/CCL2/CCL7/CXCL13/CCL21	5
BP	GO:0022612	gland morphogenesis	11/672	111/18862	0.00202899	0.0253853	0.0206829	FGL1/CRIP1/TNF/SEMA3A/PROX1/TGM2/FGFR2/CPB2/CSF1R/HGF/SOSTDC1	11
BP	GO:0090277	positive regulation of peptide hormone secretion	10/672	95/18862	0.00204252	0.0253853	0.0206829	GRP/FGA/FGG/CAMK2N1/NMU/GPR68/ADCY8/UCN3/NR0B2/FGB	10
BP	GO:0048511	rhythmic process	21/672	294/18862	0.0020553	0.0253853	0.0206829	GAS2/CSF2/EREG/RORC/SERPINE1/ARRB1/MMP7/PROX1/PTGDS/ADORA1/RETN/NMU/NKX2-1/NTRK2/NOS2/INHBA/NR0B2/SLIT3/SIK1/ETS1/MMP19	21
BP	GO:0030728	ovulation	4/672	16/18862	0.00206364	0.0253853	0.0206829	GAS2/EREG/INHBA/MMP19	4
BP	GO:0048243	norepinephrine secretion	4/672	16/18862	0.00206364	0.0253853	0.0206829	ADRA2A/ADRA2B/AGTR2/P2RY1	4
BP	GO:0061548	ganglion development	4/672	16/18862	0.00206364	0.0253853	0.0206829	INSM1/SEMA3A/TUBB3/UNC5C	4
BP	GO:0090594	inflammatory response to wounding	4/672	16/18862	0.00206364	0.0253853	0.0206829	AGER/TIMP1/ALOX5/IL1A	4
BP	GO:0006882	cellular zinc ion homeostasis	6/672	38/18862	0.00208654	0.0253853	0.0206829	MT1H/MT1A/MT1E/MT1M/MT2A/SLC39A8	6
BP	GO:0010742	macrophage derived foam cell differentiation	6/672	38/18862	0.00208654	0.0253853	0.0206829	CSF2/PLA2G2A/ITGB3/AGT/PLA2G5/LPL	6
BP	GO:0048246	macrophage chemotaxis	6/672	38/18862	0.00208654	0.0253853	0.0206829	CCL2/SAA1/SFTPD/CSF1R/MMP28/TNFSF18	6
BP	GO:0071276	cellular response to cadmium ion	6/672	38/18862	0.00208654	0.0253853	0.0206829	AKR1C3/MT1H/MT1A/MT1E/MT1M/MT2A	6
BP	GO:0071398	cellular response to fatty acid	6/672	38/18862	0.00208654	0.0253853	0.0206829	AKR1C3/CPS1/PDK4/AKR1C2/AKR1C1/LPL	6
BP	GO:0090077	foam cell differentiation	6/672	38/18862	0.00208654	0.0253853	0.0206829	CSF2/PLA2G2A/ITGB3/AGT/PLA2G5/LPL	6
BP	GO:0001942	hair follicle development	9/672	80/18862	0.0021308	0.025851	0.0210623	FOXE1/FST/SNAI1/TNF/FGFR2/TGM3/INHBA/SOX21/SOSTDC1	9
BP	GO:0120192	tight junction assembly	9/672	81/18862	0.00232317	0.0280273	0.0228355	SNAI1/TNF/CLDN2/POF1B/CLDN3/CLDN20/CLDN9/CLDN6/CLDN18	9
BP	GO:0140353	lipid export from cell	9/672	81/18862	0.00232317	0.0280273	0.0228355	ADORA1/RETN/POMC/AGT/SNAP25/NTRK2/NOS2/AGTR2/INHBA	9
BP	GO:0007043	cell-cell junction assembly	13/672	147/18862	0.00233301	0.0280676	0.0228683	SNAI1/GJA5/TNF/GJB1/CLDN2/POF1B/CDH6/AGT/CLDN3/CLDN20/CLDN9/CLDN6/CLDN18	13
BP	GO:0050433	regulation of catecholamine secretion	7/672	52/18862	0.00234424	0.0281244	0.0229146	ADRA2A/SYT7/SYT12/ADRA2B/SNCG/AGTR2/P2RY1	7
BP	GO:0046545	development of primary female sexual characteristics	10/672	97/18862	0.00238631	0.028549	0.0232606	GAS2/EREG/FST/ARRB1/RETN/INHBA/ZFP42/SLIT3/ICAM1/MMP19	10
BP	GO:0045742	positive regulation of epidermal growth factor receptor signaling pathway	6/672	39/18862	0.00239285	0.028549	0.0232606	HAP1/EREG/ADRA2A/ADORA1/AGT/AREG	6
BP	GO:0060284	regulation of cell development	30/672	485/18862	0.0025277	0.0300747	0.0245037	HAP1/LTF/PTPRZ1/FEZF1/SEMA6D/WNT7A/MYADM/FN1/OLFM4/TNF/SEMA3E/FGA/VEGFC/FGG/DCC/SEMA3A/PAEP/MME/GPR68/EPHA7/PDE3A/L1CAM/NTRK2/LIF/LRRK2/SEMA3B/UNC13D/PROC/CLDN18/FGB	30
BP	GO:0072078	nephron tubule morphogenesis	8/672	67/18862	0.00254572	0.0302059	0.0246105	IRX1/WNT6/ADAMTS16/AGT/GPC3/WNK4/AGTR2/TCF21	8
BP	GO:0050432	catecholamine secretion	7/672	53/18862	0.0026196	0.0306348	0.02496	ADRA2A/SYT7/SYT12/ADRA2B/SNCG/AGTR2/P2RY1	7
BP	GO:1905517	macrophage migration	7/672	53/18862	0.0026196	0.0306348	0.02496	CCL2/SAA1/SFTPD/CSF1R/EMILIN1/MMP28/TNFSF18	7
BP	GO:0001946	lymphangiogenesis	4/672	17/18862	0.00262325	0.0306348	0.02496	CCBE1/VEGFC/PROX1/FOXC2	4
BP	GO:0021756	striatum development	4/672	17/18862	0.00262325	0.0306348	0.02496	LRRK2/INHBA/ALDH1A3/CNTNAP2	4
BP	GO:0045187	regulation of circadian sleep/wake cycle, sleep	4/672	17/18862	0.00262325	0.0306348	0.02496	CSF2/PTGDS/ADORA1/NMU	4
BP	GO:0019216	regulation of lipid metabolic process	26/672	402/18862	0.00263011	0.0306348	0.02496	AKR1C3/ABCA3/CCN1/CYP27B1/UGT1A8/RORC/SNAI1/AGAP2/TNF/BMP5/C3/PDK4/ANKRD1/PROX1/ADRA2A/ADORA1/CGA/AGT/G0S2/ADGRF5/AADAC/FHL2/LPCAT1/SIK1/NR4A3/CCL21	26
BP	GO:0051216	cartilage development	15/672	185/18862	0.00263151	0.0306348	0.02496	CCN1/CHRDL2/PTH1R/WNT7A/SNAI1/MGP/BMP5/CHST11/TGFBI/LOXL2/COMP/COL1A1/PITX1/TIMP1/BMP3	15
BP	GO:0002573	myeloid leukocyte differentiation	16/672	204/18862	0.00269609	0.0313022	0.0255037	CSF2/LTF/TNF/ITGB6/CSF3/TSPAN2/GPR68/BATF2/GPC3/FSTL3/CSF1R/LIF/TFRC/INHBA/CLDN18/TESC	16
BP	GO:0055069	zinc ion homeostasis	6/672	40/18862	0.00273178	0.0316315	0.0257721	MT1H/MT1A/MT1E/MT1M/MT2A/SLC39A8	6
BP	GO:0022404	molting cycle process	9/672	83/18862	0.00274919	0.0316633	0.025798	FOXE1/FST/SNAI1/TNF/FGFR2/TGM3/INHBA/SOX21/SOSTDC1	9
BP	GO:0022405	hair cycle process	9/672	83/18862	0.00274919	0.0316633	0.025798	FOXE1/FST/SNAI1/TNF/FGFR2/TGM3/INHBA/SOX21/SOSTDC1	9
BP	GO:0007548	sex differentiation	19/672	262/18862	0.00277499	0.0318755	0.0259709	AKR1C3/GAS2/EREG/WNT7A/FST/SEMA3A/ARRB1/RETN/NKX2-1/DMRT3/FSTL3/DMRT2/INHBA/ZFP42/SLIT3/ICAM1/TCF21/MMP19/TESC	19
BP	GO:0002548	monocyte chemotaxis	8/672	68/18862	0.0027971	0.0319595	0.0260393	CCL2/CCL7/CCL13/SERPINE1/CCL23/CCL22/TNFSF18/CCL21	8
BP	GO:0051937	catecholamine transport	8/672	68/18862	0.0027971	0.0319595	0.0260393	SLC6A3/ADRA2A/SYT7/SYT12/ADRA2B/SNCG/AGTR2/P2RY1	8
BP	GO:0072376	protein activation cascade	5/672	28/18862	0.00281282	0.03197	0.0260478	FN1/FGA/FGG/A2M/FGB	5
BP	GO:0072378	blood coagulation, fibrin clot formation	5/672	28/18862	0.00281282	0.03197	0.0260478	FN1/FGA/FGG/A2M/FGB	5
BP	GO:0002687	positive regulation of leukocyte migration	12/672	133/18862	0.00286688	0.032498	0.0264781	CCL7/TNF/VEGFC/AGER/SERPINE1/CXCL13/CSF1R/ADAM8/ICAM1/TNFSF18/LBP/CCL21	12
BP	GO:1904019	epithelial cell apoptotic process	11/672	116/18862	0.00287433	0.032498	0.0264781	AKR1C3/CCL2/TNF/FGA/FGG/SERPINE1/COL4A3/PLA2G1B/ICAM1/NDNF/FGB	11
BP	GO:0061756	leukocyte adhesion to vascular endothelial cell	7/672	54/18862	0.00291913	0.0329183	0.0268205	TNF/SELE/SLC39A8/ICAM1/ETS1/ALOX5/CCL21	7
BP	GO:0008625	extrinsic apoptotic signaling pathway via death domain receptors	9/672	84/18862	0.00298418	0.033304	0.0271348	TNF/FGA/BMP5/FGG/SERPINE1/TIMP3/ICAM1/HGF/FGB	9
BP	GO:0042475	odontogenesis of dentin-containing tooth	9/672	84/18862	0.00298418	0.033304	0.0271348	FST/WNT6/ITGB6/SERPINE1/CSF3R/FAM20A/DMRT3/KLK5/SOSTDC1	9
BP	GO:0098773	skin epidermis development	9/672	84/18862	0.00298418	0.033304	0.0271348	FOXE1/FST/SNAI1/TNF/FGFR2/TGM3/INHBA/SOX21/SOSTDC1	9
BP	GO:0120193	tight junction organization	9/672	84/18862	0.00298418	0.033304	0.0271348	SNAI1/TNF/CLDN2/POF1B/CLDN3/CLDN20/CLDN9/CLDN6/CLDN18	9
BP	GO:0090101	negative regulation of transmembrane receptor protein serine/threonine kinase signaling pathway	12/672	134/18862	0.00304973	0.0339479	0.0276594	VEPH1/FST/PMEPA1/CHST11/CILP/NKX2-1/VASN/FSTL3/FBN2/EMILIN1/SOST/SOSTDC1	12
BP	GO:0042531	positive regulation of tyrosine phosphorylation of STAT protein	8/672	69/18862	0.00306743	0.0340572	0.0277484	CSF2/TNF/IL24/CRLF1/CSF1R/LIF/TSLP/TNFSF18	8
BP	GO:0002251	organ or tissue specific immune response	6/672	41/18862	0.00310542	0.0342151	0.0278771	LTF/RNASE2/PLA2G1B/RAB17/NOS2/PIGR	6
BP	GO:1900026	positive regulation of substrate adhesion-dependent cell spreading	6/672	41/18862	0.00310542	0.0342151	0.0278771	MYADM/OLFM4/FGA/FGG/UNC13D/FGB	6
BP	GO:1901186	positive regulation of ERBB signaling pathway	6/672	41/18862	0.00310542	0.0342151	0.0278771	HAP1/EREG/ADRA2A/ADORA1/AGT/AREG	6
BP	GO:0022604	regulation of cell morphogenesis	21/672	305/18862	0.00317874	0.0349338	0.0284626	GAS2/MYADM/FN1/CCL2/CCL7/OLFM4/SEMA3E/FGA/FGG/ATP10A/CCL13/RND1/DLC1/CLDN3/RHOBTB2/CSF1R/UNC13D/ICAM1/COCH/P2RY1/FGB	21
BP	GO:0007193	adenylate cyclase-inhibiting G protein-coupled receptor signaling pathway	9/672	85/18862	0.00323474	0.0354477	0.0288813	S1PR1/HTR1D/ADRA2A/PDE2A/ADORA1/MARCO/ADCY8/AKAP12/P2RY1	9
BP	GO:0051384	response to glucocorticoid	12/672	135/18862	0.00324191	0.0354477	0.0288813	ABCA3/CPS1/TNF/ERRFI1/FOSB/UCN3/ALDH3A1/AGTR2/FAM107A/SLIT3/AQP1/ICAM1	12
BP	GO:0036148	phosphatidylglycerol acyl-chain remodeling	4/672	18/18862	0.00327869	0.0356691	0.0290618	PLA2G2A/PLA2G5/PLA2G1B/LPCAT1	4
BP	GO:2000831	regulation of steroid hormone secretion	4/672	18/18862	0.00327869	0.0356691	0.0290618	RETN/POMC/AGT/AGTR2	4
BP	GO:0007435	salivary gland morphogenesis	5/672	29/18862	0.00330068	0.0357284	0.0291101	TNF/SEMA3A/TGM2/FGFR2/HGF	5
BP	GO:0045939	negative regulation of steroid metabolic process	5/672	29/18862	0.00330068	0.0357284	0.0291101	CYP27B1/UGT1A8/SNAI1/BMP5/PROX1	5
BP	GO:0045216	cell-cell junction organization	16/672	209/18862	0.00342614	0.0369938	0.030141	SNAI1/GJA5/TNF/TJP3/GJB1/CLDN2/POF1B/CDH6/AGT/CADM3/CLDN3/CLDN20/CSF1R/CLDN9/CLDN6/CLDN18	16
BP	GO:0042116	macrophage activation	10/672	102/18862	0.00345138	0.0371734	0.0302874	CSF2/TNF/AGER/ADGRF5/IL1RL1/DYSF/LRRK2/CD93/VSIG4/LBP	10
BP	GO:0034103	regulation of tissue remodeling	9/672	86/18862	0.00350156	0.03762	0.0306512	S1PR1/AGER/ITGB3/PDK4/SYT7/CSF1R/TFRC/ADAM8/CLDN18	9
BP	GO:0031670	cellular response to nutrient	6/672	42/18862	0.00351589	0.0376803	0.0307004	CYP27B1/FOLR1/FOXA2/COL1A1/CYP24A1/LPL	6
BP	GO:0021872	forebrain generation of neurons	7/672	56/18862	0.00359615	0.03835	0.031246	SEMA3A/PROX1/FGFR2/NKX2-1/CSF1R/INHBA/NDNF	7
BP	GO:0046456	icosanoid biosynthetic process	7/672	56/18862	0.00359615	0.03835	0.031246	AKR1C3/CBR1/PTGDS/PLA2G5/PLA2G1B/GGTLC1/ALOX5	7
BP	GO:0061333	renal tubule morphogenesis	8/672	71/18862	0.00366873	0.0390277	0.0317982	IRX1/WNT6/ADAMTS16/AGT/GPC3/WNK4/AGTR2/TCF21	8
BP	GO:0007200	phospholipase C-activating G protein-coupled receptor signaling pathway	10/672	103/18862	0.00370382	0.0393041	0.0320234	GRP/S1PR1/PTH1R/P2RY6/C5AR2/ADRA2A/TGM2/AGT/GNA14/P2RY1	10
BP	GO:0043297	apical junction assembly	9/672	87/18862	0.00378536	0.040071	0.0326482	SNAI1/TNF/CLDN2/POF1B/CLDN3/CLDN20/CLDN9/CLDN6/CLDN18	9
BP	GO:1901654	response to ketone	15/672	193/18862	0.00392803	0.0414774	0.0337941	AKR1C3/CPS1/PTGER2/ERRFI1/AKR1C2/FOSB/ADCY8/UCN3/KLF2/AGTR2/SLIT3/AQP1/ICAM1/PLN/CCL21	15
BP	GO:0008406	gonad development	16/672	212/18862	0.00393742	0.0414774	0.0337941	AKR1C3/GAS2/EREG/FST/SEMA3A/ARRB1/RETN/NKX2-1/FSTL3/INHBA/ZFP42/SLIT3/ICAM1/TCF21/MMP19/TESC	16
BP	GO:0061383	trabecula morphogenesis	6/672	43/18862	0.00396535	0.0415688	0.0338686	S1PR1/MMP2/BMP5/COL1A1/FBN2/FHL2	6
BP	GO:2000273	positive regulation of signaling receptor activity	6/672	43/18862	0.00396535	0.0415688	0.0338686	EREG/CCL2/ADRA2A/ADORA1/ADRA2B/AREG	6
BP	GO:0006883	cellular sodium ion homeostasis	4/672	19/18862	0.00403733	0.0421189	0.0343168	C7/TMPRSS3/AGTR2/IL1A	4
BP	GO:0048245	eosinophil chemotaxis	4/672	19/18862	0.00403733	0.0421189	0.0343168	CCL2/CCL7/CCL13/CCL21	4
BP	GO:0052126	movement in host environment	14/672	175/18862	0.00405587	0.0422104	0.0343913	SLC52A1/MRC1/ITGB6/ITGB3/FCN1/GPR15/CIITA/TFRC/CLDN9/CLDN6/ICAM1/CR2/DPP4/FCN3	14
BP	GO:0001819	positive regulation of cytokine production	27/672	437/18862	0.00411041	0.0426751	0.03477	CSF2/EREG/ORM2/CCBE1/EBI3/TNF/SAA1/C3/AGER/PAEP/SERPINE1/NLRP3/ADRA2A/ORM1/FCN1/AGT/PLA2G1B/IL1RL1/LPL/CSF1R/IGHD/TSLP/ADAM8/HGF/NR4A3/LBP/IL1A	27
BP	GO:0035270	endocrine system development	11/672	122/18862	0.0042407	0.0439223	0.0357861	SOX2/INSM1/FOXE1/BMP5/SLC6A3/NEUROG3/FOXA2/PITX1/NKX2-1/FSTL3/ETS1	11
BP	GO:2000027	regulation of animal organ morphogenesis	14/672	176/18862	0.00426658	0.0440846	0.0359183	SP6/WNT7A/TNF/NKD1/ROR1/RSPO3/GRHL3/AGT/GPC3/DMRT3/GPC6/AGTR2/HGF/DACT1	14
BP	GO:0060193	positive regulation of lipase activity	8/672	73/18862	0.00435736	0.0448504	0.0365423	CCN1/P2RY6/PLA2G5/FGFR2/PLA2G1B/NTRK2/SELE/GPIHBP1	8
BP	GO:0046849	bone remodeling	9/672	89/18862	0.0044068	0.0448504	0.0365423	S1PR1/PTH1R/ITGB3/PDK4/SYT7/CSF1R/TFRC/ADAM8/CLDN18	9
BP	GO:0007431	salivary gland development	5/672	31/18862	0.0044541	0.0448504	0.0365423	TNF/SEMA3A/TGM2/FGFR2/HGF	5
BP	GO:0045907	positive regulation of vasoconstriction	5/672	31/18862	0.0044541	0.0448504	0.0365423	GJA5/FGA/FGG/ICAM1/FGB	5
BP	GO:0002759	regulation of antimicrobial humoral response	3/672	10/18862	0.00447842	0.0448504	0.0365423	KLK7/PGC/KLK5	3
BP	GO:0008300	isoprenoid catabolic process	3/672	10/18862	0.00447842	0.0448504	0.0365423	AKR1C3/CYP2W1/CYP26A1	3
BP	GO:0030647	aminoglycoside antibiotic metabolic process	3/672	10/18862	0.00447842	0.0448504	0.0365423	AKR1C3/AKR1C2/AKR1C1	3
BP	GO:0032351	negative regulation of hormone metabolic process	3/672	10/18862	0.00447842	0.0448504	0.0365423	AKR1C3/CYP27B1/BMP5	3
BP	GO:0042368	vitamin D biosynthetic process	3/672	10/18862	0.00447842	0.0448504	0.0365423	CYP27B1/SNAI1/TNF	3
BP	GO:0048251	elastic fiber assembly	3/672	10/18862	0.00447842	0.0448504	0.0365423	MFAP4/EMILIN1/TNXB	3
BP	GO:0048755	branching morphogenesis of a nerve	3/672	10/18862	0.00447842	0.0448504	0.0365423	FGFR2/EPHA7/LRRK2	3
BP	GO:1900426	positive regulation of defense response to bacterium	3/672	10/18862	0.00447842	0.0448504	0.0365423	KLK7/PGC/KLK5	3
BP	GO:0008217	regulation of blood pressure	14/672	177/18862	0.00448608	0.0448504	0.0365423	GJA5/ACSM3/VEGFC/ADAMTS16/CAMK2N1/ADORA1/POMC/AGT/NMU/MME/COL1A2/ADRA2B/NOS2/AGTR2	14
BP	GO:0071346	cellular response to interferon-gamma	14/672	177/18862	0.00448608	0.0448504	0.0365423	AQP4/CCL2/CCL7/MRC1/CCL13/CCL23/HLA-DQB2/MT2A/NOS2/CIITA/GBP6/CCL22/ICAM1/CCL21	14
BP	GO:0031668	cellular response to extracellular stimulus	17/672	235/18862	0.00462757	0.0461581	0.0376078	AKR1C3/CYP27B1/DAPL1/PDK4/FOLR1/FOXA3/FOXA2/COL1A1/UCN3/CYP24A1/LPL/KRT20/LRRK2/FAM107A/SIK1/ICAM1/AOC1	17
BP	GO:0034341	response to interferon-gamma	15/672	197/18862	0.00474944	0.0472646	0.0385093	AQP4/CYP27B1/CCL2/CCL7/MRC1/CCL13/CCL23/HLA-DQB2/MT2A/NOS2/CIITA/GBP6/CCL22/ICAM1/CCL21	15
BP	GO:0006874	cellular calcium ion homeostasis	27/672	442/18862	0.00477953	0.0474547	0.0386642	HAP1/S1PR1/PTH1R/CCL7/PTGER2/SAA1/ATP2A3/P2RY6/C5AR2/KCNK3/SLC35G1/CCL13/CCL23/TGM2/ADORA1/CXCL11/NMU/NPSR1/ADCY8/PLA2G1B/CXCL13/ATP13A5/GSTM2/P2RY1/PLN/CALB1/CCL21	27
BP	GO:0019369	arachidonic acid metabolic process	7/672	59/18862	0.00482746	0.0476185	0.0387976	AKR1C3/CBR1/PTGDS/CYP4F3/CYP2C18/CYP4F11/ALOX5	7
BP	GO:0051055	negative regulation of lipid biosynthetic process	7/672	59/18862	0.00482746	0.0476185	0.0387976	AKR1C3/CYP27B1/SNAI1/BMP5/PROX1/LPCAT1/SIK1	7
BP	GO:0021854	hypothalamus development	4/672	20/18862	0.00490628	0.0476185	0.0387976	HAP1/SEMA3A/ETS1/NDNF	4
BP	GO:0045056	transcytosis	4/672	20/18862	0.00490628	0.0476185	0.0387976	AGER/RAB17/GPIHBP1/PIGR	4
BP	GO:0050802	circadian sleep/wake cycle, sleep	4/672	20/18862	0.00490628	0.0476185	0.0387976	CSF2/PTGDS/ADORA1/NMU	4
BP	GO:0051767	nitric-oxide synthase biosynthetic process	4/672	20/18862	0.00490628	0.0476185	0.0387976	CCL2/FCER2/LRRK2/AKAP12	4
BP	GO:0051769	regulation of nitric-oxide synthase biosynthetic process	4/672	20/18862	0.00490628	0.0476185	0.0387976	CCL2/FCER2/LRRK2/AKAP12	4
BP	GO:0052695	cellular glucuronidation	4/672	20/18862	0.00490628	0.0476185	0.0387976	UGT1A8/UGT1A7/UGT1A10/UGT2A1	4
BP	GO:0060713	labyrinthine layer morphogenesis	4/672	20/18862	0.00490628	0.0476185	0.0387976	CCN1/BMP5/RSPO3/FGFR2	4
BP	GO:1902644	tertiary alcohol metabolic process	4/672	20/18862	0.00490628	0.0476185	0.0387976	AKR1C3/BMP5/AKR1C2/AKR1C1	4
BP	GO:0045137	development of primary sexual characteristics	16/672	217/18862	0.00492768	0.047719	0.0388795	AKR1C3/GAS2/EREG/FST/SEMA3A/ARRB1/RETN/NKX2-1/FSTL3/INHBA/ZFP42/SLIT3/ICAM1/TCF21/MMP19/TESC	16
BP	GO:0001974	blood vessel remodeling	6/672	45/18862	0.00498985	0.0481053	0.0391943	RSPO3/TGM2/AGT/FOXC2/LIF/AGTR2	6
BP	GO:0085029	extracellular matrix assembly	6/672	45/18862	0.00498985	0.0481053	0.0391943	HAS1/AGT/MFAP4/COL1A2/EMILIN1/TNXB	6
BP	GO:0007411	axon guidance	19/672	277/18862	0.00507405	0.0488081	0.0397668	FEZF1/SEMA6D/SEMA3E/DCC/SEMA3A/OTX2/VSTM2L/EPHA7/NKX2-1/EPHB6/L1CAM/TUBB3/EPHB1/CSF1R/UNC5C/SEMA3B/LAMC2/SLIT3/ARTN	19
BP	GO:0007626	locomotory behavior	13/672	161/18862	0.00509795	0.048929	0.0398654	FGF12/SLC6A3/FOXA2/PAK5/ADCY8/SNAP25/SNCG/NKX2-1/DMRT3/LRRK2/ALDH1A3/DPP4/CALB1	13
BP	GO:0048333	mesodermal cell differentiation	5/672	32/18862	0.00512694	0.0490982	0.0400032	ITGB3/ITGA3/FGFR2/FOXC2/INHBA	5
BP	GO:0007189	adenylate cyclase-activating G protein-coupled receptor signaling pathway	12/672	143/18862	0.00515769	0.0491745	0.0400654	S1PR1/ADGRE1/PTH1R/PTGER2/ADRA2A/CXCL11/ADCY8/UCN3/ADRA2B/APLP1/MRAP2/PLN	12
BP	GO:0048754	branching morphogenesis of an epithelial tube	12/672	143/18862	0.00515769	0.0491745	0.0400654	TNF/SEMA3E/WNT6/ADAMTS16/HHIP/AGT/FGFR2/NKX2-1/GPC3/FOXC2/AGTR2/TCF21	12
BP	GO:0097485	neuron projection guidance	19/672	278/18862	0.00527099	0.0500996	0.0408192	FEZF1/SEMA6D/SEMA3E/DCC/SEMA3A/OTX2/VSTM2L/EPHA7/NKX2-1/EPHB6/L1CAM/TUBB3/EPHB1/CSF1R/UNC5C/SEMA3B/LAMC2/SLIT3/ARTN	19
BP	GO:0010518	positive regulation of phospholipase activity	7/672	60/18862	0.00530112	0.0500996	0.0408192	CCN1/P2RY6/PLA2G5/FGFR2/PLA2G1B/NTRK2/SELE	7
BP	GO:0032722	positive regulation of chemokine production	7/672	60/18862	0.00530112	0.0500996	0.0408192	TNF/AGER/IL1RL1/LPL/CSF1R/TSLP/LBP	7
BP	GO:0061098	positive regulation of protein tyrosine kinase activity	7/672	60/18862	0.00530112	0.0500996	0.0408192	EREG/ADRA2A/ADORA1/AGT/NTRK2/CSF1R/AREG	7
BP	GO:0032635	interleukin-6 production	13/672	162/18862	0.00536787	0.0506197	0.0412429	EREG/TNF/AGER/C5AR2/ARRB1/ORM1/KLF2/LPL/NOS2/TSLP/HGF/LBP/IL1A	13
BP	GO:0034329	cell junction assembly	26/672	425/18862	0.00545765	0.0513406	0.0418302	WNT7A/FN1/SNAI1/GJA5/TNF/GJB1/CLDN2/POF1B/DLC1/AMIGO2/CDH6/AGT/FLNC/EPHA7/LRRC4/CLDN3/RAB17/CLDN20/GPC6/NTRK2/EPHB1/LAMC2/CLDN9/FAM107A/CLDN6/CLDN18	26
BP	GO:0003007	heart morphogenesis	17/672	239/18862	0.00546809	0.0513406	0.0418302	CCN1/S1PR1/SNAI1/GJA5/BMP5/TMEM100/TNNC1/ANKRD1/FOLR1/PROX1/DLC1/FGFR2/MICAL2/COL5A1/FOXC2/FHL2/SLIT3	17
BP	GO:1901655	cellular response to ketone	9/672	92/18862	0.00548476	0.0513855	0.0418668	AKR1C3/PTGER2/ERRFI1/AKR1C2/ADCY8/KLF2/AGTR2/AQP1/ICAM1	9
BP	GO:0030500	regulation of bone mineralization	8/672	76/18862	0.00557154	0.0520855	0.0424372	CCN1/LTF/S1PR1/CYP27B1/MGP/COMP/FBN2/ALOX5	8
BP	GO:0034368	protein-lipid complex remodeling	5/672	33/18862	0.00586867	0.0542622	0.0442107	PLA2G2A/AGT/PLA2G5/LPL/GPIHBP1	5
BP	GO:0034369	plasma lipoprotein particle remodeling	5/672	33/18862	0.00586867	0.0542622	0.0442107	PLA2G2A/AGT/PLA2G5/LPL/GPIHBP1	5
BP	GO:0051591	response to cAMP	9/672	93/18862	0.00588601	0.0542622	0.0442107	CPS1/SLC6A3/PDE2A/FOSB/COL1A1/SLC5A5/ALDH3A1/AQP1/MMP19	9
BP	GO:0019370	leukotriene biosynthetic process	4/672	21/18862	0.00589233	0.0542622	0.0442107	PLA2G5/PLA2G1B/GGTLC1/ALOX5	4
BP	GO:0033630	positive regulation of cell adhesion mediated by integrin	4/672	21/18862	0.00589233	0.0542622	0.0442107	FOXC2/CXCL13/LIF/CCL21	4
BP	GO:0036303	lymph vessel morphogenesis	4/672	21/18862	0.00589233	0.0542622	0.0442107	CCBE1/VEGFC/PROX1/FOXC2	4
BP	GO:0042749	regulation of circadian sleep/wake cycle	4/672	21/18862	0.00589233	0.0542622	0.0442107	CSF2/PTGDS/ADORA1/NMU	4
BP	GO:0009612	response to mechanical stimulus	15/672	202/18862	0.00596689	0.0547506	0.0446086	COL3A1/KCNK2/ANKRD1/MMP7/PDE2A/RETN/FOSB/PIEZO2/COL1A1/PHF24/SOST/CNTNAP2/AQP1/ETS1/P2RY1	15
BP	GO:0019371	cyclooxygenase pathway	3/672	11/18862	0.00599608	0.0547506	0.0446086	AKR1C3/CBR1/PTGDS	3
BP	GO:0043589	skin morphogenesis	3/672	11/18862	0.00599608	0.0547506	0.0446086	ERRFI1/COL1A1/COL1A2	3
BP	GO:0052697	xenobiotic glucuronidation	3/672	11/18862	0.00599608	0.0547506	0.0446086	UGT1A8/UGT1A7/UGT1A10	3
BP	GO:1901214	regulation of neuron death	20/672	302/18862	0.00602697	0.0549166	0.0447438	PTPRZ1/CCL2/AGAP2/TNF/CRLF1/DCC/GABRA5/ARRB1/CSF3/ADORA1/VSTM2L/EPHA7/SNCG/NTRK2/EPHB1/TFAP2B/LRRK2/ADAM8/NDNF/NR4A3	20
BP	GO:0051480	regulation of cytosolic calcium ion concentration	22/672	344/18862	0.00613994	0.0558282	0.0454866	HAP1/S1PR1/PTH1R/PTGER2/SAA1/P2RY6/C5AR2/KCNK3/SLC35G1/TGM2/ADORA1/CXCL11/NMU/NPSR1/ADCY8/PLA2G1B/CXCL13/GSTM2/P2RY1/PLN/CALB1/CCL21	22
BP	GO:0007157	heterophilic cell-cell adhesion via plasma membrane cell adhesion molecules	6/672	47/18862	0.00619627	0.0559868	0.0456158	IGSF21/AMIGO2/CEACAM6/CADM3/SELE/ICAM1	6
BP	GO:0042572	retinol metabolic process	6/672	47/18862	0.00619627	0.0559868	0.0456158	AKR1C3/ADH1C/ADH7/CYP27C1/ALDH1A3/ADH1B	6
BP	GO:1903053	regulation of extracellular matrix organization	6/672	47/18862	0.00619627	0.0559868	0.0456158	AGT/CPB2/EMILIN1/FAP/ETS1/DPP4	6
BP	GO:0001667	ameboidal-type cell migration	28/672	473/18862	0.00625782	0.0563033	0.0458736	SEMA6D/CCBE1/WNT7A/FN1/TNF/SEMA3E/MEOX2/VEGFC/HAS1/SEMA3A/ITGB3/LOXL2/FOLR1/PROX1/ITGA3/AGT/GPC3/ATOH8/FOXC2/FGFBP1/CXCL13/TIMP1/SEMA3B/AGTR2/FAP/AKAP12/ETS1/DPP4	28
BP	GO:0046660	female sex differentiation	10/672	111/18862	0.00629024	0.0563033	0.0458736	GAS2/EREG/FST/ARRB1/RETN/INHBA/ZFP42/SLIT3/ICAM1/MMP19	10
BP	GO:0042982	amyloid precursor protein metabolic process	9/672	94/18862	0.00630951	0.0563033	0.0458736	HAP1/ADAM19/TNF/AGER/NECAB2/KLK6/NTRK2/RTN1/SPON1	9
BP	GO:0050764	regulation of phagocytosis	9/672	94/18862	0.00630951	0.0563033	0.0458736	CCL2/TNF/C3/SFTPD/SYT7/PLA2G5/C4B/DYSF/C4A	9
BP	GO:0061097	regulation of protein tyrosine kinase activity	9/672	94/18862	0.00630951	0.0563033	0.0458736	EREG/ERRFI1/ADRA2A/ADORA1/AGT/GPRC5A/NTRK2/CSF1R/AREG	9
BP	GO:0070167	regulation of biomineral tissue development	9/672	94/18862	0.00630951	0.0563033	0.0458736	CCN1/LTF/S1PR1/CYP27B1/MGP/WNT6/COMP/FBN2/ALOX5	9
BP	GO:0070373	negative regulation of ERK1 and ERK2 cascade	8/672	78/18862	0.00651378	0.0580062	0.0472611	ERRFI1/ARRB1/TIMP3/DUSP4/CAMK2N1/LMO3/LIF/EMILIN1	8
BP	GO:0002691	regulation of cellular extravasation	5/672	34/18862	0.0066828	0.0590246	0.0480909	AGER/SELE/ADAM8/ICAM1/CCL21	5
BP	GO:0044060	regulation of endocrine process	5/672	34/18862	0.0066828	0.0590246	0.0480909	RETN/POMC/AGT/AGTR2/INHBA	5
BP	GO:0060428	lung epithelium development	5/672	34/18862	0.0066828	0.0590246	0.0480909	SPDEF/ERRFI1/FGFR2/NKX2-1/KLF2	5
BP	GO:1901661	quinone metabolic process	5/672	34/18862	0.0066828	0.0590246	0.0480909	AKR1C3/AKR1C2/CYP4F3/AKR1C1/CYP4F11	5
BP	GO:0002673	regulation of acute inflammatory response	6/672	48/18862	0.00687311	0.0603353	0.0491587	TNF/C3/NLRP3/ADORA1/C2CD4B/ADAM8	6
BP	GO:0060425	lung morphogenesis	6/672	48/18862	0.00687311	0.0603353	0.0491587	TNF/HHIP/FGFR2/NKX2-1/LIF/TCF21	6
BP	GO:0060688	regulation of morphogenesis of a branching structure	6/672	48/18862	0.00687311	0.0603353	0.0491587	TNF/AGT/FGFR2/LRRK2/AGTR2/HGF	6
BP	GO:0006081	cellular aldehyde metabolic process	7/672	63/18862	0.00693201	0.060606	0.0493793	AKR1C3/ALDH3B1/BMP5/AKR1C1/CYP27C1/ALDH3A1/ALDH1A3	7
BP	GO:2000401	regulation of lymphocyte migration	7/672	63/18862	0.00693201	0.060606	0.0493793	PADI2/C10orf99/CCL2/CCL7/CXCL13/ADAM8/CCL21	7
BP	GO:0048880	sensory system development	23/672	369/18862	0.00696826	0.0607257	0.0494768	CRYBB3/SOX2/WNT7A/SMOC1/WNT6/NKD1/C3/SEMA3A/BIRC7/SLC6A3/GRHL3/PROX1/COL8A1/CPAMD8/COL5A1/FOXC2/NTRK2/FBN2/TFAP2B/LPCAT1/INHBA/ALDH1A3/CALB1	23
BP	GO:2001233	regulation of apoptotic signaling pathway	22/672	348/18862	0.00699844	0.0607257	0.0494768	CSF2/RNF183/TNFRSF12A/SNAI1/TNF/FGA/BMP5/FGG/SERPINE1/TIMP3/AGT/G0S2/PAK5/MUC1/LRRK2/AGTR2/INHBA/PLEKHF1/ICAM1/HGF/FGB/IL1A	22
BP	GO:0042359	vitamin D metabolic process	4/672	22/18862	0.00700194	0.0607257	0.0494768	CYP27B1/SNAI1/TNF/CYP24A1	4
BP	GO:0060343	trabecula formation	4/672	22/18862	0.00700194	0.0607257	0.0494768	MMP2/COL1A1/FBN2/FHL2	4
CC	GO:0062023	collagen-containing extracellular matrix	62/686	423/19520	7.51695e-22	2.97671e-19	2.5795e-19	CCN1/FGL1/ORM2/EMILIN3/CSPG4/ADAM19/SMOC1/FN1/MMP2/MGP/COL3A1/AMBP/FGA/FGG/ADAMTS5/VTN/TGFBI/LOXL2/SERPINE1/COMP/COL4A3/TIMP3/COL8A1/TGM2/ORM1/FCN1/SERPINB12/A2M/ADAMTS4/AGT/CLEC3B/FGFR2/ADAMTSL4/MFAP4/COL1A1/COL1A2/TINAGL1/COL5A3/COL5A1/CILP/GPC3/FIBCD1/SSC5D/PRSS1/L1CAM/GPC6/FBN2/APLP1/SPON1/TIMP1/SOD3/EMILIN1/SEMA3B/LAMC2/TNXB/MMP28/SOST/ICAM1/COCH/SERPINA1/FCN3/FGB	62
CC	GO:0042599	lamellar body	9/686	17/19520	1.46616e-09	2.90299e-07	2.51562e-07	ABCA3/SFTPA1/KLK7/SFTA3/SFTPA2/SFTPB/KLK5/NAPSA/SFTPC	9
CC	GO:0034774	secretory granule lumen	35/686	322/19520	3.43306e-09	4.40987e-07	3.82142e-07	PADI2/GRP/LTF/ORM2/FN1/OLFM4/RNASE2/PPBP/FGA/VEGFC/FGG/C3/QPCT/CDA/SERPINE1/PCSK1/TIMP3/ORM1/RETN/FCN1/A2M/POMC/FOLR3/CLEC3B/PLAC8/TIMP1/PRSS2/CRISPLD2/SCG3/UNC13D/HGF/AOC1/ALOX5/SERPINA1/FGB	35
CC	GO:0060205	cytoplasmic vesicle lumen	35/686	326/19520	4.74609e-09	4.40987e-07	3.82142e-07	PADI2/GRP/LTF/ORM2/FN1/OLFM4/RNASE2/PPBP/FGA/VEGFC/FGG/C3/QPCT/CDA/SERPINE1/PCSK1/TIMP3/ORM1/RETN/FCN1/A2M/POMC/FOLR3/CLEC3B/PLAC8/TIMP1/PRSS2/CRISPLD2/SCG3/UNC13D/HGF/AOC1/ALOX5/SERPINA1/FGB	35
CC	GO:0031983	vesicle lumen	35/686	328/19520	5.56802e-09	4.40987e-07	3.82142e-07	PADI2/GRP/LTF/ORM2/FN1/OLFM4/RNASE2/PPBP/FGA/VEGFC/FGG/C3/QPCT/CDA/SERPINE1/PCSK1/TIMP3/ORM1/RETN/FCN1/A2M/POMC/FOLR3/CLEC3B/PLAC8/TIMP1/PRSS2/CRISPLD2/SCG3/UNC13D/HGF/AOC1/ALOX5/SERPINA1/FGB	35
CC	GO:0072562	blood microparticle	22/686	146/19520	8.44239e-09	5.57198e-07	4.82846e-07	IGKV1-39/IGHV3-13/ORM2/IGKV2D-28/FN1/AMBP/FGA/FGG/C3/VTN/ORM1/A2M/AGT/PRSS1/C4B/IGHD/CFB/C4BPA/TFRC/FCN3/FGB/C4A	22
CC	GO:0005788	endoplasmic reticulum lumen	33/686	306/19520	1.17395e-08	6.64122e-07	5.75502e-07	CCN1/SERPIND1/WNT7A/FN1/MSLN/EBI3/WNT6/COL3A1/FGA/FGG/ADAMTS5/C3/COLGALT2/COL4A3/ARSI/COL8A1/ADAMTSL4/COL1A1/CYP2W1/COL1A2/COL5A3/COL5A1/GPC3/FSTL3/SPON1/TIMP1/SCG3/ARSL/PROC/P4HA3/EVA1A/SERPINA1/C4A	33
CC	GO:0005581	collagen trimer	16/686	87/19520	5.27928e-08	2.61324e-06	2.26453e-06	COLEC12/SFTPA1/CCBE1/COL3A1/SFTPA2/COL4A3/COL8A1/SFTPD/FCN1/MARCO/COL1A1/COL1A2/COL5A3/COL5A1/EMILIN1/FCN3	16
CC	GO:0031093	platelet alpha granule lumen	13/686	67/19520	4.91524e-07	2.16271e-05	1.87411e-05	ORM2/FN1/PPBP/FGA/VEGFC/FGG/SERPINE1/ORM1/A2M/TIMP1/HGF/SERPINA1/FGB	13
CC	GO:0019814	immunoglobulin complex	20/686	167/19520	1.77234e-06	7.01847e-05	6.08193e-05	IGLL1/IGKV1-39/IGHV3-13/IGLV9-49/IGKV2D-28/IGHV3-38/IGKV6D-21/IGKV2D-24/IGLV3-12/IGHV3-53/IGLV2-33/IGHV3-66/IGLV3-22/IGKV1D-39/IGKV1-27/IGHD/IGKV3D-7/IGLV3-9/IGLV4-3/PIGR	20
CC	GO:0031091	platelet alpha granule	14/686	91/19520	3.3611e-06	0.000121	0.000104853	ORM2/FN1/PPBP/FGA/VEGFC/FGG/ITGB3/SERPINE1/ORM1/A2M/TIMP1/HGF/SERPINA1/FGB	14
CC	GO:0098644	complex of collagen trimers	7/686	21/19520	4.85422e-06	0.000160189	0.000138814	COL3A1/COL4A3/COL8A1/COL1A1/COL1A2/COL5A3/COL5A1	7
CC	GO:0031225	anchored component of membrane	19/686	170/19520	8.86258e-06	0.000269968	0.000233943	GP2/IGSF21/CPM/NRN1/MSLN/FOLR1/LY6H/SMPDL3B/DPEP1/FOLR3/CEACAM6/ALPP/GPC3/GPC6/NT5E/RTN4RL2/RGMA/GPIHBP1/RAET1L	19
CC	GO:0005796	Golgi lumen	14/686	102/19520	1.31088e-05	0.000370791	0.000321313	CSPG4/WNT7A/MUC16/WNT6/CGA/MUC1/GPC3/MUC5B/GPC6/SOD3/ABCC5/PROC/MUC13/MUC21	14
CC	GO:0009897	external side of plasma membrane	32/686	402/19520	1.58189e-05	0.000417619	0.000361892	IGLL1/IGSF21/IGHV3-13/S1PR1/AQP4/EBI3/IGHV3-38/TNF/IL13RA2/CD163/FGA/CRLF1/ITGB6/FGG/FCER2/FOLR1/CSF3R/ITGA3/FCN1/CSF2RA/FOLR3/IGHV3-53/IGHV3-66/IL1RL1/IGHD/TFRC/NT5E/RTN4RL2/GPIHBP1/ICAM1/RAET1L/FGB	32
CC	GO:0005583	fibrillar collagen trimer	5/686	12/19520	3.40669e-05	0.000793558	0.000687666	COL3A1/COL1A1/COL1A2/COL5A3/COL5A1	5
CC	GO:0098643	banded collagen fibril	5/686	12/19520	3.40669e-05	0.000793558	0.000687666	COL3A1/COL1A1/COL1A2/COL5A3/COL5A1	5
CC	GO:0001533	cornified envelope	8/686	45/19520	0.000152223	0.00334891	0.00290204	CST6/TCHH/KRT10/SPRR1A/SPRR2F/SPRR3/CSTA/RPTN	8
CC	GO:0016324	apical plasma membrane	26/686	351/19520	0.000303986	0.00633571	0.00549027	GP2/SLCO2B1/PTH1R/CSPG4/FN1/ATP6V0A4/KCNK2/AGER/UPK1B/FOLR1/SLC34A2/PRKG2/DPEP1/SLC9A4/CEACAM6/MUC1/ADCY8/RAB17/CLIC5/ABCC5/GPIHBP1/AQP1/SLC39A8/P2RY1/DPP4/MUC13	26
CC	GO:0045177	apical part of cell	29/686	414/19520	0.000356752	0.00706369	0.00612111	GP2/SLCO2B1/PTH1R/CSPG4/FN1/ATP6V0A4/KCNK2/AGER/C5AR2/UPK1B/FOLR1/SLC34A2/PRKG2/DPEP1/SLC9A4/CEACAM6/ADGRF5/MUC1/ADCY8/RAB17/CLIC5/ABCC5/FAP/GPIHBP1/AQP1/SLC39A8/P2RY1/DPP4/MUC13	29
CC	GO:0044306	neuron projection terminus	13/686	130/19520	0.000669989	0.0126341	0.0109482	KCNK2/ROR1/ADORA1/NMU/MME/UCN3/SNCG/FSTL3/NTRK2/NTS/PNOC/LRRK2/CALB1	13
CC	GO:0045178	basal part of cell	20/686	258/19520	0.000833097	0.0145608	0.0126178	AQP4/PTH1R/SLC4A4/C5AR2/ARRB1/FOLR1/ITGA3/ADRA2A/SLC9A4/ADORA1/ADCY8/RAB17/GKN2/TFRC/ABCC5/FAP/GPIHBP1/AQP1/SLC39A8/P2RY1	20
CC	GO:0031258	lamellipodium membrane	5/686	22/19520	0.000845702	0.0145608	0.0126178	CSPG4/ITGB3/PLEK2/FAP/DPP4	5
CC	GO:0016323	basolateral plasma membrane	17/686	211/19520	0.0013115	0.0209105	0.0181203	AQP4/PTH1R/SLC4A4/ARRB1/FOLR1/ITGA3/ADRA2A/SLC9A4/ADORA1/ADCY8/RAB17/TFRC/ABCC5/GPIHBP1/AQP1/SLC39A8/P2RY1	17
CC	GO:0030139	endocytic vesicle	22/686	307/19520	0.00132011	0.0209105	0.0181203	COLEC12/LTF/SFTPA1/WNT7A/ATP6V0A4/SFTA3/CD163/WNT6/SAA1/DMBT1/SFTPA2/SFTPB/HLA-DQB2/SFTPD/SYT7/PLA2G5/MARCO/RAB17/DYSF/ADAM8/SFTPC/DPP4	22
CC	GO:0035580	specific granule lumen	8/686	62/19520	0.00141456	0.0215449	0.0186699	LTF/ORM2/OLFM4/QPCT/ORM1/RETN/FOLR3/AOC1	8
CC	GO:0042581	specific granule	14/686	160/19520	0.00157378	0.0230822	0.0200021	LTF/ORM2/MCEMP1/OLFM4/ALDH3B1/QPCT/ORM1/RETN/FOLR3/OLR1/SNAP25/CD93/ADAM8/AOC1	14
CC	GO:0005604	basement membrane	10/686	94/19520	0.00170778	0.0241529	0.02093	SMOC1/FN1/TGFBI/LOXL2/COL4A3/COL8A1/COL5A1/APLP1/TIMP1/LAMC2	10
CC	GO:0009925	basal plasma membrane	18/686	240/19520	0.00213871	0.0292045	0.0253074	AQP4/PTH1R/SLC4A4/C5AR2/ARRB1/FOLR1/ITGA3/ADRA2A/SLC9A4/ADORA1/ADCY8/RAB17/TFRC/ABCC5/GPIHBP1/AQP1/SLC39A8/P2RY1	18
CC	GO:0043679	axon terminus	11/686	114/19520	0.00225879	0.029816	0.0258374	KCNK2/ROR1/ADORA1/NMU/UCN3/SNCG/NTRK2/NTS/PNOC/LRRK2/CALB1	11
CC	GO:0005923	bicellular tight junction	11/686	117/19520	0.00277197	0.0354096	0.0306846	CLMP/TJP3/CLDN2/POF1B/CLDN3/CLDN20/WNK4/CLDN9/CLDN6/AOC1/CLDN18	11
CC	GO:0150034	distal axon	20/686	287/19520	0.00295685	0.0361123	0.0312935	HAP1/KCNK2/ROR1/KIF21B/ITGA3/ADORA1/OTX2/NMU/UCN3/SNAP25/SNCG/L1CAM/NTRK2/TUBB3/NTS/PNOC/UNC5C/LRRK2/RASGRF1/CALB1	20
CC	GO:1904724	tertiary granule lumen	7/686	55/19520	0.00300936	0.0361123	0.0312935	LTF/OLFM4/PPBP/QPCT/CDA/ORM1/FOLR3	7
CC	GO:0030136	clathrin-coated vesicle	15/686	192/19520	0.00330249	0.0377579	0.0327195	EREG/SFTPA1/SFTA3/FOLR1/SFTPA2/SFTPB/HLA-DQB2/SFTPD/ADCY8/NRGN/RASSF9/AREG/TFRC/UNC13D/SFTPC	15
CC	GO:0099056	integral component of presynaptic membrane	7/686	56/19520	0.00333719	0.0377579	0.0327195	GABRA5/SLC6A3/ADORA1/SYT7/ADCY8/ADAM23/P2RY1	7
CC	GO:0098686	hippocampal mossy fiber to CA3 synapse	5/686	30/19520	0.0036295	0.0395095	0.0342374	SYT7/ADCY8/EPHA7/SYT12/CALB1	5
CC	GO:0045334	clathrin-coated endocytic vesicle	7/686	57/19520	0.00369154	0.0395095	0.0342374	SFTPA1/SFTA3/SFTPA2/SFTPB/HLA-DQB2/SFTPD/SFTPC	7
CC	GO:0031362	anchored component of external side of plasma membrane	4/686	19/19520	0.00384533	0.0400724	0.0347252	IGSF21/FOLR1/FOLR3/GPIHBP1	4
CC	GO:0005882	intermediate filament	16/686	215/19520	0.00396596	0.0402698	0.0348962	KRTAP19-1/KRT13/KRT23/CASP14/KRT33A/KRT10/KRT7/KRT86/KRT4/KRT24/KRT15/KRT31/KRT20/DES/KRT81/KRT77	16
CC	GO:0008305	integrin complex	5/686	31/19520	0.0042044	0.0416236	0.0360693	ITGB6/ITGB3/ITGA3/ITGBL1/EMILIN1	5
CC	GO:0070160	tight junction	11/686	124/19520	0.00433863	0.0419048	0.036313	CLMP/TJP3/CLDN2/POF1B/CLDN3/CLDN20/WNK4/CLDN9/CLDN6/AOC1/CLDN18	11
CC	GO:0046658	anchored component of plasma membrane	7/686	60/19520	0.0049273	0.0464574	0.0402581	IGSF21/FOLR1/FOLR3/GPC3/GPC6/RTN4RL2/GPIHBP1	7
CC	GO:0070820	tertiary granule	13/686	164/19520	0.005322	0.0490119	0.0424718	LTF/MCEMP1/OLFM4/PPBP/QPCT/CDA/ORM1/SERPINB12/FOLR3/OLR1/SNAP25/CD93/ADAM8	13
CC	GO:0099699	integral component of synaptic membrane	11/686	128/19520	0.0055089	0.0495801	0.0429641	DCC/GABRA5/SLC6A3/ADORA1/SYT7/ADCY8/EPHA7/LRRC4/ADAM23/PTPRT/P2RY1	11
CC	GO:0005771	multivesicular body	7/686	62/19520	0.00590874	0.0519969	0.0450585	SFTPA1/SFTPA2/SFTPB/SFTPD/LRRK2/NAPSA/SFTPC	7
MF	GO:0008201	heparin binding	31/659	164/18337	2.4952e-14	1.79155e-11	1.57066e-11	CCN1/SERPIND1/LTF/SMOC1/FN1/CCL7/SAA1/ADAMTS5/VTN/CCL23/MMP7/RSPO3/COMP/CXCL11/CLEC3B/FGFR2/COL5A3/COL5A1/FGFBP1/CXCL13/APLP1/LPL/SOD3/LAMC2/CRISPLD2/TNXB/SLIT3/SOST/RSPO4/NDNF/AOC1	31
MF	GO:0005539	glycosaminoglycan binding	35/659	228/18337	3.51424e-13	1.26161e-10	1.10606e-10	CCN1/SERPIND1/LTF/SMOC1/FN1/CCL7/SAA1/ADAMTS5/VTN/RNASE7/CCL23/MMP7/RSPO3/NLRP3/COMP/CXCL11/CLEC3B/FGFR2/PGLYRP3/COL5A3/COL5A1/FGFBP1/CXCL13/APLP1/LPL/SOD3/LAMC2/CRISPLD2/TNXB/SLIT3/SOST/RSPO4/SUSD5/NDNF/AOC1	35
MF	GO:0048018	receptor ligand activity	53/659	486/18337	5.66317e-13	1.35539e-10	1.18827e-10	CSF2/EREG/GRP/GAST/C10orf99/SEMA6D/WNT7A/CCL2/CCL7/EBI3/TNF/SEMA3E/WNT6/PPBP/IL24/CRLF1/BMP5/VEGFC/SEMA3A/CCL13/FGF12/CCL23/CSF3/CXCL5/RETN/CGA/CXCL11/POMC/AGT/EPHA7/UCN3/THPO/CXCL13/NTS/IL11/PNOC/TIMP1/LIF/AREG/BMP3/SEMA3B/TSLP/INHBA/MIA/ARTN/CCL22/HGF/TNFSF8/DPP4/TNFSF18/CXCL2/CCL21/IL1A	53
MF	GO:0030546	signaling receptor activator activity	53/659	492/18337	9.20533e-13	1.65236e-10	1.44863e-10	CSF2/EREG/GRP/GAST/C10orf99/SEMA6D/WNT7A/CCL2/CCL7/EBI3/TNF/SEMA3E/WNT6/PPBP/IL24/CRLF1/BMP5/VEGFC/SEMA3A/CCL13/FGF12/CCL23/CSF3/CXCL5/RETN/CGA/CXCL11/POMC/AGT/EPHA7/UCN3/THPO/CXCL13/NTS/IL11/PNOC/TIMP1/LIF/AREG/BMP3/SEMA3B/TSLP/INHBA/MIA/ARTN/CCL22/HGF/TNFSF8/DPP4/TNFSF18/CXCL2/CCL21/IL1A	53
MF	GO:1901681	sulfur compound binding	36/659	260/18337	3.72529e-12	5.34951e-10	4.68994e-10	CCN1/SERPIND1/LTF/GSTM1/FST/SMOC1/FN1/CCL7/SAA1/ADAMTS5/VTN/MCCC1/CCL23/MMP7/RSPO3/COMP/GSTM3/CXCL11/CLEC3B/FGFR2/COL5A3/COL5A1/FGFBP1/CXCL13/APLP1/LPL/SOD3/LAMC2/CRISPLD2/TNXB/SLIT3/SOST/RSPO4/NDNF/AOC1/GSTM2	36
MF	GO:0005201	extracellular matrix structural constituent	27/659	170/18337	8.10971e-11	9.52363e-09	8.34941e-09	CCN1/GP2/EMILIN3/FN1/MGP/COL3A1/FGA/FGG/VTN/TGFBI/COMP/COL4A3/COL8A1/TFPI2/MFAP4/COL1A1/COL1A2/TINAGL1/COL5A3/COL5A1/CILP/FBN2/SPON1/EMILIN1/LAMC2/TNXB/FGB	27
MF	GO:0005125	cytokine activity	32/659	235/18337	9.28488e-11	9.52363e-09	8.34941e-09	CSF2/C10orf99/WNT7A/CCL2/CCL7/EBI3/TNF/WNT6/PPBP/IL24/CRLF1/BMP5/CCL13/CCL23/CSF3/CXCL5/CXCL11/THPO/CXCL13/IL11/TIMP1/LIF/AREG/BMP3/TSLP/INHBA/CCL22/TNFSF8/TNFSF18/CXCL2/CCL21/IL1A	32
MF	GO:0030414	peptidase inhibitor activity	28/659	187/18337	1.50294e-10	1.34889e-08	1.18258e-08	SERPIND1/SERPINB2/LTF/CST6/FETUB/SPINK1/AMBP/NLRP7/C3/CST2/BIRC7/SPINK6/SERPINE1/COL4A3/TIMP3/DPEP1/SERPINB12/A2M/AGT/SERPINB11/TFPI2/CPAMD8/GPC3/CSTA/C4B/TIMP1/SERPINA1/C4A	28
MF	GO:0004866	endopeptidase inhibitor activity	27/659	180/18337	3.07428e-10	2.45259e-08	2.1502e-08	SERPIND1/SERPINB2/LTF/CST6/FETUB/SPINK1/AMBP/NLRP7/C3/CST2/BIRC7/SPINK6/SERPINE1/COL4A3/TIMP3/DPEP1/SERPINB12/A2M/AGT/SERPINB11/TFPI2/CPAMD8/CSTA/C4B/TIMP1/SERPINA1/C4A	27
MF	GO:0061134	peptidase regulator activity	30/659	230/18337	1.03461e-09	7.42853e-08	6.51262e-08	SERPIND1/SERPINB2/LTF/CST6/FETUB/FN1/SPINK1/AMBP/NLRP7/C3/CST2/ATP2A3/BIRC7/SPINK6/SERPINE1/COL4A3/TIMP3/DPEP1/SERPINB12/A2M/AGT/SERPINB11/TFPI2/CPAMD8/GPC3/CSTA/C4B/TIMP1/SERPINA1/C4A	30
MF	GO:0001664	G protein-coupled receptor binding	34/659	289/18337	1.26908e-09	8.01048e-08	7.02282e-08	S1PR1/C10orf99/WNT7A/CCL2/CCL7/WNT6/PPBP/SAA1/C3/CCL13/CCL23/ARRB1/RSPO3/NECAB2/ADRA2A/CXCL5/ADORA1/FCN1/CXCL11/POMC/AGT/NMU/GNA14/MARCO/UCN3/CXCL13/APLP1/NTS/PNOC/MRAP2/CCL22/P2RY1/CXCL2/CCL21	34
MF	GO:0061135	endopeptidase regulator activity	27/659	192/18337	1.3388e-09	8.01048e-08	7.02282e-08	SERPIND1/SERPINB2/LTF/CST6/FETUB/SPINK1/AMBP/NLRP7/C3/CST2/BIRC7/SPINK6/SERPINE1/COL4A3/TIMP3/DPEP1/SERPINB12/A2M/AGT/SERPINB11/TFPI2/CPAMD8/CSTA/C4B/TIMP1/SERPINA1/C4A	27
MF	GO:0002020	protease binding	22/659	131/18337	1.55465e-09	8.58647e-08	7.5278e-08	CCBE1/FN1/TNF/COL3A1/NLRP7/ITGB3/SERPINE1/SLC6A3/COMP/TIMP3/ITGA3/A2M/ADAMTS4/ADAMTSL4/COL1A1/COL1A2/CSTA/NTRK2/TIMP1/FAP/DPP4/SERPINA1	22
MF	GO:0038024	cargo receptor activity	16/659	75/18337	7.67821e-09	3.93782e-07	3.45231e-07	COLEC12/CD163/MRC1/VTN/AGER/DMBT1/LOXL2/FOLR1/CFI/MARCO/OLR1/SSC5D/MEGF10/TMPRSS3/TFRC/ASGR2	16
MF	GO:0033293	monocarboxylic acid binding	15/659	71/18337	2.59784e-08	1.2435e-06	1.09018e-06	AKR1C3/UGT1A8/MCCC1/UGT1A7/AKR1C2/PTGDS/AKR1C1/CYP27C1/CYP2W1/PLA2G1B/ACOX2/GSTA1/CYP26A1/CYP4F11/GSTM2	15
MF	GO:0008009	chemokine activity	12/659	49/18337	1.14464e-07	5.13658e-06	4.50326e-06	C10orf99/CCL2/CCL7/PPBP/CCL13/CCL23/CXCL5/CXCL11/CXCL13/CCL22/CXCL2/CCL21	12
MF	GO:0004252	serine-type endopeptidase activity	22/659	168/18337	1.63614e-07	6.76563e-06	5.93146e-06	TMPRSS11F/LTF/KLK7/MMP2/MMP7/PCSK1/CFI/KLK6/TMPRSS11D/MMP3/PRSS1/TMPRSS3/MMP1/KLK5/CFB/PRSS2/ADAM8/FAP/PROC/HGF/DPP4/TMPRSS11A	22
MF	GO:0004857	enzyme inhibitor activity	36/659	385/18337	1.73861e-07	6.76563e-06	5.93146e-06	SERPIND1/SERPINB2/LTF/UGT1A8/CST6/FETUB/SPINK1/AMBP/NLRP7/C3/CST2/BIRC7/SPINK6/UGT1A7/SERPINE1/ARRB1/COL4A3/TIMP3/DPEP1/CAMK2N1/SERPINB12/A2M/AGT/SERPINB11/TFPI2/CPAMD8/GPC3/CSTA/C4B/TIMP1/LRRK2/SCG5/PLN/SERPINA1/TESC/C4A	36
MF	GO:0005178	integrin binding	20/659	142/18337	1.79035e-07	6.76563e-06	5.93146e-06	CCN1/PTPRZ1/FN1/COL3A1/ITGB6/FCER2/ADAMTS5/VTN/ITGB3/TGFBI/COMP/COL4A3/ITGA3/COL5A1/ITGBL1/EMILIN1/TNXB/ADAM23/FAP/ICAM1	20
MF	GO:0031406	carboxylic acid binding	23/659	184/18337	2.02838e-07	7.2819e-06	6.38407e-06	AKR1C3/UGT1A8/CPS1/SIGLEC12/MCCC1/UGT1A7/AKR1C2/FOLR1/PTGDS/AKR1C1/FCN1/CYP27C1/FOLR3/CYP2W1/PLA2G1B/ACOX2/GSTA1/NOS2/SELE/CYP26A1/CYP4F11/P4HA3/GSTM2	23
MF	GO:0017171	serine hydrolase activity	23/659	188/18337	3.00082e-07	1.02599e-05	8.99493e-06	TMPRSS11F/LTF/KLK7/MMP2/MMP7/PCSK1/CFI/KLK6/TMPRSS11D/MMP3/AADAC/PRSS1/TMPRSS3/MMP1/KLK5/CFB/PRSS2/ADAM8/FAP/PROC/HGF/DPP4/TMPRSS11A	23
MF	GO:0004175	endopeptidase activity	38/659	438/18337	5.31678e-07	1.7352e-05	1.52126e-05	TMPRSS11F/LTF/CASP14/ADAM19/CPS1/KLK7/MMP2/CTSE/PGC/ADAMTS5/ADAMTS16/MMP7/PCSK1/CFI/KLK6/TMPRSS11D/MMP3/ADAMTS4/MME/ADAMTSL4/PRSS1/MMP13/TMPRSS3/MMP1/KLK5/CFB/CAPN8/PRSS2/NAPSA/ADAM23/ADAM8/FAP/MMP28/PROC/HGF/DPP4/TMPRSS11A/MMP19	38
MF	GO:0005044	scavenger receptor activity	11/659	47/18337	6.36229e-07	1.98614e-05	1.74126e-05	COLEC12/CD163/VTN/AGER/DMBT1/LOXL2/CFI/MARCO/SSC5D/MEGF10/TMPRSS3	11
MF	GO:0008236	serine-type peptidase activity	22/659	186/18337	9.68361e-07	2.89701e-05	2.53982e-05	TMPRSS11F/LTF/KLK7/MMP2/MMP7/PCSK1/CFI/KLK6/TMPRSS11D/MMP3/PRSS1/TMPRSS3/MMP1/KLK5/CFB/PRSS2/ADAM8/FAP/PROC/HGF/DPP4/TMPRSS11A	22
MF	GO:0001848	complement binding	7/659	21/18337	5.61531e-06	0.000156516	0.000137218	C4B/MEGF10/CFB/CD93/VSIG4/CR2/C4A	7
MF	GO:0042379	chemokine receptor binding	12/659	69/18337	5.6677e-06	0.000156516	0.000137218	C10orf99/CCL2/CCL7/PPBP/CCL13/CCL23/CXCL5/CXCL11/CXCL13/CCL22/CXCL2/CCL21	12
MF	GO:0004222	metalloendopeptidase activity	15/659	107/18337	6.47005e-06	0.000172055	0.000150842	ADAM19/MMP2/ADAMTS5/ADAMTS16/MMP7/MMP3/ADAMTS4/MME/ADAMTSL4/MMP13/MMP1/ADAM23/ADAM8/MMP28/MMP19	15
MF	GO:0004497	monooxygenase activity	14/659	101/18337	1.49293e-05	0.00038283	0.000335629	AKR1C3/CYP27B1/AKR1C2/CYP4F3/AKR1C1/CYP27C1/CYP2C18/MICAL2/CYP2W1/CYP4B1/CYP24A1/NOS2/CYP26A1/CYP4F11	14
MF	GO:0008083	growth factor activity	18/659	162/18337	2.19878e-05	0.000544387	0.000477266	CSF2/EREG/PPBP/BMP5/VEGFC/FGF12/CSF3/AGT/THPO/IL11/TIMP1/LIF/AREG/BMP3/INHBA/MIA/ARTN/HGF	18
MF	GO:0019838	growth factor binding	16/659	137/18337	3.36947e-05	0.000806427	0.000706998	HAP1/CCN1/IGFBP6/COL3A1/NLRP7/ITGB3/FGFBP2/A2M/FGFR2/COL1A1/COL1A2/COL5A1/VASN/NTRK2/FGFBP1/CXCL13	16
MF	GO:0008237	metallopeptidase activity	19/659	184/18337	3.68254e-05	0.000836874	0.000733691	CPM/ADAM19/MMP2/FOLH1/ADAMTS5/ADAMTS16/MMP7/DPEP1/MMP3/ADAMTS4/MME/ADAMTSL4/MMP13/CPB2/MMP1/ADAM23/ADAM8/MMP28/MMP19	19
MF	GO:0030246	carbohydrate binding	24/659	267/18337	3.7298e-05	0.000836874	0.000733691	COLEC12/CHI3L2/SFTPA1/FBXO2/NPTX2/MRC1/FCER2/SIGLEC12/VTN/LOXL2/SFTPA2/SFTPD/FCN1/CLEC2L/CLEC3B/OLR1/C4B/SELE/CD93/HKDC1/P4HA3/FBP1/ASGR2/FCN3	24
MF	GO:0005126	cytokine receptor binding	24/659	270/18337	4.46312e-05	0.000955119	0.000837357	CSF2/C10orf99/CCL2/CCL7/TNF/PPBP/CRLF1/VEGFC/ITGB3/CCL13/CCL23/CSF3/CXCL5/CXCL11/CXCL13/IL11/LIF/TSLP/CCL22/TNFSF8/TNFSF18/CXCL2/CCL21/IL1A	24
MF	GO:0016709	oxidoreductase activity, acting on paired donors, with incorporation or reduction of molecular oxygen, NAD(P)H as one donor, and incorporation of one atom of oxygen	9/659	48/18337	4.52285e-05	0.000955119	0.000837357	AKR1C3/CYP27B1/AKR1C2/CYP4F3/AKR1C1/MICAL2/NOS2/CYP26A1/CYP4F11	9
MF	GO:0004867	serine-type endopeptidase inhibitor activity	13/659	98/18337	4.80368e-05	0.000985441	0.00086394	SERPIND1/SERPINB2/SPINK1/AMBP/SPINK6/SERPINE1/SERPINB12/A2M/AGT/SERPINB11/TFPI2/CPAMD8/SERPINA1	13
MF	GO:0001618	virus receptor activity	11/659	76/18337	8.13015e-05	0.00162151	0.00142159	SLC52A1/MRC1/ITGB6/ITGB3/GPR15/TFRC/CLDN9/CLDN6/ICAM1/CR2/DPP4	11
MF	GO:0140272	exogenous protein binding	11/659	77/18337	9.18219e-05	0.00178184	0.00156215	SLC52A1/MRC1/ITGB6/ITGB3/GPR15/TFRC/CLDN9/CLDN6/ICAM1/CR2/DPP4	11
MF	GO:0019955	cytokine binding	15/659	136/18337	0.000113599	0.00214643	0.00188178	EBI3/IL13RA2/CRLF1/NLRP7/ITGB3/COMP/CSF3R/ACKR1/A2M/CSF2RA/IL1RL1/VASN/CSF1R/SOST/SOSTDC1	15
MF	GO:0072341	modified amino acid binding	12/659	93/18337	0.000122164	0.00224907	0.00197177	GSTM1/GRAMD1B/CPS1/FOLR1/GSTM3/DPEP1/FOLR3/SYT7/MME/GSDMA/SYT12/GSTM2	12
MF	GO:0050840	extracellular matrix binding	9/659	55/18337	0.000137068	0.00246037	0.00215702	CCN1/SMOC1/ADAMTS5/ITGB3/DMBT1/TGFBI/ITGA3/TINAGL1/SSC5D	9
MF	GO:0005501	retinoid binding	7/659	37/18337	0.000301425	0.00527862	0.00462779	UGT1A8/UGT1A7/PTGDS/ADH7/CYP27C1/CYP2W1/CYP26A1	7
MF	GO:0045499	chemorepellent activity	6/659	27/18337	0.000326663	0.00558439	0.00489585	SEMA6D/SEMA3E/SEMA3A/EPHA7/SEMA3B/DPP4	6
MF	GO:0045236	CXCR chemokine receptor binding	5/659	18/18337	0.000342599	0.0057206	0.00501527	PPBP/CXCL5/CXCL11/CXCL13/CXCL2	5
MF	GO:0019840	isoprenoid binding	7/659	38/18337	0.000358164	0.00584459	0.00512397	UGT1A8/UGT1A7/PTGDS/ADH7/CYP27C1/CYP2W1/CYP26A1	7
MF	GO:0032052	bile acid binding	4/659	11/18337	0.000445744	0.00695749	0.00609966	AKR1C3/AKR1C2/AKR1C1/PLA2G1B	4
MF	GO:0048407	platelet-derived growth factor binding	4/659	11/18337	0.000445744	0.00695749	0.00609966	COL3A1/COL1A1/COL1A2/COL5A1	4
MF	GO:0030020	extracellular matrix structural constituent conferring tensile strength	7/659	41/18337	0.000581212	0.00873633	0.00765918	COL3A1/COL4A3/COL8A1/COL1A1/COL1A2/COL5A3/COL5A1	7
MF	GO:0001972	retinoic acid binding	5/659	20/18337	0.000584045	0.00873633	0.00765918	UGT1A8/UGT1A7/CYP27C1/CYP2W1/CYP26A1	5
MF	GO:0016705	oxidoreductase activity, acting on paired donors, with incorporation or reduction of molecular oxygen	15/659	160/18337	0.000667651	0.00978313	0.00857691	AKR1C3/CYP27B1/AKR1C2/CYP4F3/AKR1C1/CYP27C1/CYP2C18/MICAL2/CYP2W1/CYP4B1/CYP24A1/NOS2/CYP26A1/CYP4F11/P4HA3	15
MF	GO:1900750	oligopeptide binding	4/659	13/18337	0.000911845	0.0130941	0.0114797	GSTM1/FOLH1/GSTM3/GSTM2	4
MF	GO:0038187	pattern recognition receptor activity	5/659	23/18337	0.00115934	0.0163216	0.0143093	COLEC12/DMBT1/FCN1/MARCO/PGLYRP3	5
MF	GO:0048020	CCR chemokine receptor binding	7/659	46/18337	0.00118493	0.0163612	0.0143439	CCL2/CCL7/CCL13/CCL23/CXCL13/CCL22/CCL21	7
MF	GO:0020037	heme binding	13/659	140/18337	0.00162579	0.0214593	0.0188135	CYP27B1/AMBP/CYP4F3/CYP27C1/CYP2C18/MB/CYP2W1/CYP4B1/CYP24A1/NOS2/CYP26A1/CYP4F11/STEAP4	13
MF	GO:0043394	proteoglycan binding	6/659	36/18337	0.00163365	0.0214593	0.0188135	FST/FN1/COMP/COL5A3/COL5A1/LPL	6
MF	GO:0001846	opsonin binding	4/659	15/18337	0.00164382	0.0214593	0.0188135	MEGF10/CD93/VSIG4/C4A	4
MF	GO:0005504	fatty acid binding	6/659	37/18337	0.0018915	0.0242517	0.0212616	UGT1A8/PTGDS/ACOX2/GSTA1/CYP4F11/GSTM2	6
MF	GO:0004364	glutathione transferase activity	5/659	26/18337	0.00207337	0.0259205	0.0227246	GSTM1/GSTM3/GSTA4/GSTA1/GSTM2	5
MF	GO:0008191	metalloendopeptidase inhibitor activity	4/659	16/18337	0.00212996	0.0259205	0.0227246	FETUB/COL4A3/TIMP3/TIMP1	4
MF	GO:0022841	potassium ion leak channel activity	4/659	16/18337	0.00212996	0.0259205	0.0227246	KCNK17/KCNK5/KCNK2/KCNK3	4
MF	GO:0043177	organic acid binding	11/659	114/18337	0.00267824	0.0320495	0.028098	UGT1A8/CPS1/MCCC1/UGT1A7/FOLR1/CYP27C1/FOLR3/CYP2W1/NOS2/CYP26A1/P4HA3	11
MF	GO:0001968	fibronectin binding	5/659	28/18337	0.00291973	0.0341434	0.0299337	IGFBP6/ITGB3/ITGA3/SSC5D/FSTL3	5
MF	GO:0005518	collagen binding	8/659	68/18337	0.00294831	0.0341434	0.0299337	CCBE1/FN1/TGFBI/COMP/ITGA3/COL5A3/MMP13/COCH	8
MF	GO:0046906	tetrapyrrole binding	13/659	150/18337	0.00299698	0.0341561	0.0299448	CYP27B1/AMBP/CYP4F3/CYP27C1/CYP2C18/MB/CYP2W1/CYP4B1/CYP24A1/NOS2/CYP26A1/CYP4F11/STEAP4	13
MF	GO:0004869	cysteine-type endopeptidase inhibitor activity	7/659	56/18337	0.00377022	0.0422971	0.0370821	LTF/CST6/FETUB/CST2/BIRC7/DPEP1/CSTA	7
MF	GO:0022840	leak channel activity	4/659	19/18337	0.00416403	0.0452996	0.0397144	KCNK17/KCNK5/KCNK2/KCNK3	4
MF	GO:0022842	narrow pore channel activity	4/659	19/18337	0.00416403	0.0452996	0.0397144	KCNK17/KCNK5/KCNK2/KCNK3	4
MF	GO:0005179	hormone activity	11/659	122/18337	0.0045199	0.0477507	0.0418633	GRP/GAST/RETN/CGA/POMC/AGT/UCN3/THPO/NTS/PNOC/INHBA	11
MF	GO:0008401	retinoic acid 4-hydroxylase activity	3/659	10/18337	0.00458886	0.0477507	0.0418633	CYP2C18/CYP2W1/CYP26A1	3
MF	GO:0018455	alcohol dehydrogenase [NAD(P)+] activity	3/659	10/18337	0.00458886	0.0477507	0.0418633	ADH1C/ADH7/ADH1B	3
MF	GO:0004745	retinol dehydrogenase activity	4/659	20/18337	0.00505903	0.0518912	0.0454932	AKR1C3/ADH1C/ADH7/ADH1B	4
MF	GO:0005507	copper ion binding	7/659	60/18337	0.00555202	0.0561458	0.0492232	LOXL2/HEPHL1/SNCG/SOD3/AOC3/AOC1/IL1A	7

## Sheet: KEGG
Table S4. GO terms and KEGG pathways analysis of the DEGs between high-PEPScore subgroup and low-PEPScore subgroup
ID	Description	GeneRatio	BgRatio	pvalue	p.adjust	qvalue	geneID	Count
hsa04610	Complement and coagulation cascades	20/328	85/8113	9.80885e-11	2.73667e-08	2.3851e-08	SERPIND1/SERPINB2/FGA/FGG/C3/VTN/SERPINE1/CFI/A2M/C7/C4B/CPB2/CFB/C4BPA/VSIG4/PROC/CR2/SERPINA1/FGB/C4A	20
hsa00980	Metabolism of xenobiotics by cytochrome P450	16/328	78/8113	6.21867e-08	8.67505e-06	7.56059e-06	CBR1/GSTM1/UGT1A8/ADH1C/ALDH3B1/UGT1A7/GSTM3/GSTA4/ADH7/AKR1C1/UGT1A10/UGT2A1/GSTA1/ALDH3A1/ADH1B/GSTM2	16
hsa04060	Cytokine-cytokine receptor interaction	32/328	295/8113	2.78221e-07	2.58745e-05	2.25505e-05	CSF2/TNFRSF12A/CCL2/CCL7/EBI3/TNF/IL13RA2/PPBP/IL24/BMP5/CCL13/CCL23/CSF3R/CSF3/CXCL5/CXCL11/CSF2RA/IL1RL1/THPO/CXCL13/CSF1R/IL11/LIF/BMP3/TSLP/INHBA/CCL22/TNFSF8/TNFSF18/CXCL2/CCL21/IL1A	32
hsa00982	Drug metabolism - cytochrome P450	14/328	72/8113	8.41882e-07	5.87213e-05	5.11776e-05	GSTM1/UGT1A8/ADH1C/ALDH3B1/UGT1A7/GSTM3/GSTA4/ADH7/UGT1A10/UGT2A1/GSTA1/ALDH3A1/ADH1B/GSTM2	14
hsa05150	Staphylococcus aureus infection	16/328	96/8113	1.23368e-06	6.88393e-05	5.99958e-05	KRT13/KRT23/KRT33A/KRT10/FGG/C3/CFI/KRT24/FCGR2A/KRT15/KRT31/C4B/CFB/KRT20/ICAM1/C4A	16
hsa05204	Chemical carcinogenesis - DNA adducts	13/328	69/8113	3.03125e-06	0.000140953	0.000122845	CBR1/GSTM1/UGT1A8/UGT1A7/AKR1C2/GSTM3/GSTA4/CYP2C18/UGT1A10/UGT2A1/GSTA1/SULT1A2/GSTM2	13
hsa04640	Hematopoietic cell lineage	15/328	99/8113	9.00492e-06	0.00035615	0.000310396	CSF2/TNF/FCER2/ITGB3/CSF3R/CSF3/ITGA3/CSF2RA/MME/THPO/CSF1R/IL11/TFRC/CR2/IL1A	15
hsa04933	AGE-RAGE signaling pathway in diabetic complications	15/328	100/8113	1.02122e-05	0.00035615	0.000310396	FN1/CCL2/MMP2/TNF/COL3A1/VEGFC/AGER/SERPINE1/COL4A3/AGT/COL1A1/COL1A2/SELE/ICAM1/IL1A	15
hsa00830	Retinol metabolism	12/328	68/8113	1.47591e-05	0.000457531	0.000398753	UGT1A8/ADH1C/UGT1A7/ADH7/CYP27C1/CYP2C18/UGT1A10/CYP2W1/UGT2A1/CYP26A1/ALDH1A3/ADH1B	12
hsa04061	Viral protein interaction with cytokine and cytokine receptor	14/328	100/8113	4.46362e-05	0.00124535	0.00108536	CCL2/CCL7/TNF/PPBP/IL24/CCL13/CCL23/CXCL5/CXCL11/CXCL13/CSF1R/CCL22/CXCL2/CCL21	14
hsa04974	Protein digestion and absorption	14/328	103/8113	6.22908e-05	0.00157992	0.00137695	COL3A1/KCNK5/KCNN4/COL4A3/COL8A1/MME/COL1A1/COL1A2/COL5A3/COL5A1/PRSS1/CPB2/PRSS2/DPP4	14
hsa04512	ECM-receptor interaction	12/328	88/8113	0.000201381	0.00465056	0.00405312	FN1/ITGB6/VTN/ITGB3/COMP/COL4A3/ITGA3/SV2B/COL1A1/COL1A2/LAMC2/TNXB	12
hsa05133	Pertussis	11/328	76/8113	0.000216693	0.00465056	0.00405312	SFTPA1/TNF/C3/SFTPA2/NLRP3/CXCL5/C4B/NOS2/C4BPA/IL1A/C4A	11
hsa04657	IL-17 signaling pathway	12/328	94/8113	0.000376838	0.00750984	0.00654508	CSF2/CCL2/CCL7/TNF/CSF3/MMP3/CXCL5/FOSB/MUC5B/MMP13/MMP1/CXCL2	12
hsa05414	Dilated cardiomyopathy	12/328	96/8113	0.000458538	0.00852882	0.00743315	CACNA2D2/TNF/ITGB6/ATP2A3/ITGB3/TNNC1/ITGA3/AGT/ADCY8/DES/CACNA2D3/PLN	12
hsa00350	Tyrosine metabolism	7/328	36/8113	0.000501814	0.00875039	0.00762626	HGD/ADH1C/ALDH3B1/ADH7/ALDH3A1/AOC3/ADH1B	7
hsa00590	Arachidonic acid metabolism	9/328	61/8113	0.000699726	0.0114837	0.0100085	AKR1C3/CBR1/PLA2G2A/GPX2/PTGDS/CYP4F3/PLA2G5/PLA2G1B/ALOX5	9
hsa05144	Malaria	8/328	50/8113	0.000796422	0.0123445	0.0107587	CCL2/TNF/COMP/CSF3/ACKR1/SELE/ICAM1/HGF	8
hsa04976	Bile secretion	11/328	89/8113	0.00086548	0.0127089	0.0110762	AQP4/SLC4A4/UGT1A8/UGT1A7/UGT1A10/ADCY8/UGT2A1/SLCO1A2/SCTR/NR0B2/AQP1	11
hsa04360	Axon guidance	17/328	182/8113	0.00107684	0.0150219	0.0130921	SEMA6D/SEMA3E/DCC/SEMA3A/RND1/ABLIM3/NFATC2/PAK5/EPHA7/LRRC4/EPHB6/L1CAM/EPHB1/UNC5C/SEMA3B/SLIT3/RGMA	17
hsa05323	Rheumatoid arthritis	11/328	93/8113	0.00125151	0.0166272	0.0144911	CSF2/CCL2/ATP6V0A4/TNF/MMP3/CXCL5/MMP1/IL11/ICAM1/CXCL2/IL1A	11
hsa00983	Drug metabolism - other enzymes	10/328	80/8113	0.00135086	0.0171313	0.0149305	GSTM1/UGT1A8/UGT1A7/CDA/GSTM3/GSTA4/UGT1A10/UGT2A1/GSTA1/GSTM2	10
hsa05146	Amoebiasis	11/328	102/8113	0.00264926	0.0321367	0.0280082	CSF2/FN1/TNF/COL3A1/COL4A3/GNA14/COL1A1/COL1A2/NOS2/LAMC2/CXCL2	11
hsa05410	Hypertrophic cardiomyopathy	10/328	90/8113	0.00328826	0.0369132	0.0321711	CACNA2D2/TNF/ITGB6/ATP2A3/ITGB3/TNNC1/ITGA3/AGT/DES/CACNA2D3	10
hsa04145	Phagosome	14/328	152/8113	0.00330764	0.0369132	0.0321711	COLEC12/SFTPA1/ATP6V0A4/MRC1/C3/ITGB3/SFTPA2/COMP/SFTPD/FCGR2A/MARCO/OLR1/TUBB3/TFRC	14
hsa05418	Fluid shear stress and atherosclerosis	13/328	139/8113	0.00401239	0.043056	0.0375248	GSTM1/CCL2/MMP2/TNF/ITGB3/GSTM3/GSTA4/KLF2/GSTA1/SELE/ICAM1/GSTM2/IL1A	13
hsa04611	Platelet activation	12/328	124/8113	0.00426243	0.0440451	0.0383868	COL3A1/FGA/FGG/ITGB3/PRKG2/FCGR2A/RASGRP2/ADCY8/COL1A1/COL1A2/P2RY1/FGB	12
