# Supplementary material for: A pyroptosis expression pattern score predicts prognosis and immune microenvironment of lung squamous cell carcinoma
Source: Front Genet. 2022 Nov 10;13:996444. doi: 10.3389/fgene.2022.996444 (PMC9685532; doi:10.3389/fgene.2022.996444)
Supplement: Supplementary file 6 [file Table5.XLSX]

## Sheet: Sheet1
Table S5. The gene set enrichment analysis between the high-PEPScore and low-PEPScore subgroups
ID	Description	setSize	enrichmentScore	NES	pvalue	p.adjust	qvalues	rank	leading_edge	core_enrichment
HALLMARK_ALLOGRAFT_REJECTION	HALLMARK_ALLOGRAFT_REJECTION	185	0.671848	2.20484	1e-10	5.55556e-10	2.69006e-10	3341	tags=67%, list=20%, signal=54%	EREG/ICAM1/TNF/NLRP3/INHBA/CCL13/CCL7/CXCL13/CCL2/CCL22/IL11/LIF/ETS1/TIMP1/C2/CD40LG/HDAC9/HLA-DOA/MMP9/CCR2/CD74/STAB1/ITGB2/TGFB2/IRF8/HLA-DMA/CD4/CD8B/CFP/SPI1/CCR1/IL12RB1/CSF1/CD80/CD79A/LTB/FYB1/NCF4/ITK/WAS/IL4R/IL2RB/IL16/HLA-G/IRF7/THY1/ITGAL/CCL5/HLA-DRA/HLA-DQA1/PTPRC/CXCR3/STAT4/FCGR2B/CCR5/SRGN/LY86/HLA-DMB/CD28/LCP2/IRF4/ACHE/IL2RG/PRKCB/FGR/CCL19/IL10/GPR65/TRAT1/IL1B/LCK/CD86/CD3…
HALLMARK_COAGULATION	HALLMARK_COAGULATION	114	0.688304	2.19102	1e-10	5.55556e-10	2.69006e-10	3100	tags=63%, list=19%, signal=52%	APOC3/APOA1/FGA/TFPI2/FGG/CPB2/TF/ITGB3/SERPINA1/TIMP3/C8B/FN1/DPP4/CFB/MMP3/CTSE/COMP/CRIP2/SERPINE1/OLR1/A2M/HMGCS2/ACOX2/C3/MMP7/CFI/TIMP1/MMP1/PROC/MMP2/C2/F10/THBS1/PLAU/MMP9/SERPING1/C1QA/FBN1/HPN/CTSH/MMP10/PDGFB/SPARC/RAPGEF3/C1R/C1S/PRSS23/DUSP6/CLU/PECAM1/MMP14/CFH/VWF/CTSB/ANG/RGN/KLF7/CTSK/LRP1/CTSO/BMP1/APOC1/CFD/CSRP1/PLEK/KLK8/CPQ/HTRA1/CAPN5/PLAT/F3/LGMN
HALLMARK_COMPLEMENT	HALLMARK_COMPLEMENT	182	0.607318	1.98785	1e-10	5.55556e-10	2.69006e-10	3339	tags=52%, list=20%, signal=42%	TFPI2/SCG3/CPM/MMP13/SERPINA1/CDA/FN1/DPP4/CFB/LTF/SERPINE1/OLR1/FCN1/C3/CR2/TIMP1/C2/MT3/CD40LG/F10/DUSP5/GATA3/ITGAM/SERPING1/C1QA/PLAUR/C1QC/CTSH/PDGFB/TIMP2/GNG2/CTSL/WAS/PIK3R5/C1R/IRF7/C1S/CCL5/DUSP6/CLU/PIK3CG/MMP12/LCP2/FCER1G/EHD1/SPOCK2/MMP14/SH2B3/CFH/COL4A2/F5/CEBPB/DOCK10/CTSD/GNGT2/LCK/PLA2G7/CTSS/CTSB/ANG/GZMK/TNFAIP3/LRP1/CTSO/CD59/NOTCH4/APOC1/ERAP2/ANXA5/IRF1/DOCK4/CSRP1/ZFPM2/P…
HALLMARK_E2F_TARGETS	HALLMARK_E2F_TARGETS	200	-0.522798	-2.3547	1e-10	5.55556e-10	2.69006e-10	5494	tags=62%, list=33%, signal=42%	HMGB2/DLGAP5/STAG1/PMS2/CHEK1/MCM6/RACGAP1/UBR7/LYAR/POLE/TOP2A/TRIP13/HNRNPD/ILF3/TMPO/PRIM2/SRSF1/KIF4A/RFC3/SYNCRIP/LBR/ESPL1/TBRG4/PAN2/NCAPD2/ZW10/MCM3/MELK/LMNB1/TUBG1/PSIP1/UBE2S/POLD2/SNRPB/PA2G4/PRPS1/ING3/DEPDC1/SUV39H1/NOP56/MSH2/SLBP/RBBP7/PLK4/H2AX/RRM2/MCM4/CENPE/TP53/PCNA/PSMC3IP/MCM2/LUC7L3/TIPIN/CSE1L/NME1/KIF22/SRSF2/HMGA1/GINS4/CKS1B/NUP205/CDKN3/PNN/MCM7/DSCC1/XRCC6/JPT1/KPNA2…
HALLMARK_EPITHELIAL_MESENCHYMAL_TRANSITION	HALLMARK_EPITHELIAL_MESENCHYMAL_TRANSITION	199	0.682663	2.25207	1e-10	5.55556e-10	2.69006e-10	3585	tags=73%, list=22%, signal=58%	TFPI2/NT5E/PRSS2/ITGB3/TIMP3/TGM2/PMEPA1/FN1/FSTL3/AREG/MMP3/COMP/CRLF1/LOXL2/APLP1/SERPINE1/TGFBI/DKK1/INHBA/NNMT/VEGFC/LAMC2/SCG2/TNFRSF12A/FOXC2/CDH6/COL5A1/CCN1/SNTB1/COL1A1/SLIT3/COL1A2/COL3A1/TIMP1/FAP/MMP1/MMP2/MGP/COL5A3/COL5A2/BGN/PCOLCE/COL6A2/THBS1/FBLN5/LGALS1/TAGLN/COL6A3/POSTN/FMOD/ELN/ITGA5/ACTA2/PLAUR/ANPEP/IL32/GADD45B/LRRC15/PTX3/NID2/FBN1/PDGFRB/EMP3/CCN2/FBLN2/COL8A2/MYL9/SPAR…
HALLMARK_INFLAMMATORY_RESPONSE	HALLMARK_INFLAMMATORY_RESPONSE	183	0.65579	2.14848	1e-10	5.55556e-10	2.69006e-10	3281	tags=60%, list=20%, signal=49%	EREG/ITGB3/CSF3/CXCL11/MARCO/ICAM1/ROS1/SERPINE1/NLRP3/OLR1/SELE/PTGER2/IL1A/INHBA/CCL7/CCL2/CCL22/SLC4A4/EBI3/GPR132/LIF/ADGRE1/CSF3R/TIMP1/CCR7/HAS2/PTAFR/AXL/C5AR1/PTGIR/CLEC5A/KCNA3/STAB1/SLC7A2/ITGA5/PLAUR/CD69/C3AR1/CYBB/SGMS2/CD14/CXCL10/TNFRSF1B/GPR183/CCL24/IL7R/EMP3/HPN/SCARF1/CMKLR1/FPR1/CSF1/CD70/HRH1/IL10RA/IL4R/IL2RB/OSM/PIK3R5/AQP9/MSR1/IRF7/APLNR/CCL5/CCL17/PTPRE/CCRL2/TNFAIP6/RGS…
HALLMARK_INTERFERON_GAMMA_RESPONSE	HALLMARK_INTERFERON_GAMMA_RESPONSE	198	0.614468	2.02742	1e-10	5.55556e-10	2.69006e-10	3823	tags=61%, list=23%, signal=47%	CXCL11/ICAM1/MT2A/CFB/CCL7/CCL2/CIITA/BATF2/CD74/SERPING1/CD69/CXCL10/IRF8/HLA-DMA/HLA-DRB1/EPSTI1/CMKLR1/IFITM2/FPR1/PTGS2/IL10RA/IL4R/ZBP1/IL2RB/HLA-G/C1R/IRF7/C1S/CCL5/HLA-DQA1/STAT4/OASL/FGL2/TNFAIP6/ST3GAL5/LCP2/IRF4/ITGB7/HELZ2/CFH/IFITM3/IFI44L/UPP1/FCGR1A/HLA-B/MVP/SAMD9L/IFIT3/ISG15/SELP/CD86/VAMP5/IFIT2/IFIT1/IFI30/ST8SIA4/HLA-A/LY6E/TNFAIP3/SLAMF7/RSAD2/VCAM1/IL15RA/LATS2/SOCS3/SSPN/SA…
HALLMARK_KRAS_SIGNALING_UP	HALLMARK_KRAS_SIGNALING_UP	189	0.642921	2.11597	1e-10	5.55556e-10	2.69006e-10	2455	tags=49%, list=15%, signal=42%	TPH1/NR0B2/PCP4/PEG3/PPBP/SCG3/EREG/CSF2/KCNN4/RETN/TMEM100/SCG5/WNT7A/G0S2/AKAP12/CFB/PIGR/ADAM8/SNAP25/HKDC1/INHBA/GFPT2/SPON1/GNG11/PCSK1N/ALDH1A3/SEMA3B/LIF/ETS1/ITGBL1/PLEK2/CSF2RA/F13A1/TMEM176A/HDAC9/EPHB2/PLAU/MMP9/FLT4/TMEM176B/PLAUR/C3AR1/ITGB2/CXCL10/TNFRSF1B/IRF8/DOCK2/IL7R/ENG/BIRC3/LAT2/CMKLR1/MMP10/BMP2/TLR8/LAPTM5/ADGRA2/PTGS2/CD37/IL10RA/CLEC4A/ANGPTL4/DUSP6/TSPAN1/RBP4/PECAM1/RG…
HALLMARK_MYC_TARGETS_V1	HALLMARK_MYC_TARGETS_V1	199	-0.533013	-2.39532	1e-10	5.55556e-10	2.69006e-10	6626	tags=77%, list=40%, signal=46%	IMPDH2/CDK4/TARDBP/RPS10/EPRS1/YWHAQ/IARS1/G3BP1/SMARCC1/PSMC6/CCT5/APEX1/VDAC1/HNRNPU/FAM120A/RNPS1/SLC25A3/DDX21/RPS5/CDK2/NAP1L1/RAN/LSM2/EIF4H/ETF1/PPIA/RRP9/AIMP2/KPNB1/PHB/PSMD8/RPL34/RPL18/PSMD7/YWHAE/UBE2E1/RPL14/PSMB3/RAD23B/RPL22/PWP1/MCM6/COPS5/PSMD3/TCP1/ERH/PSMC4/EEF1B2/HNRNPD/NPM1/TYMS/TUFM/SRPK1/EIF4E/PPM1G/SRSF1/PABPC4/RSL1D1/IFRD1/RPS2/VBP1/NCBP1/HNRNPC/EIF1AX/SYNCRIP/PTGES3/SNRP…
HALLMARK_TNFA_SIGNALING_VIA_NFKB	HALLMARK_TNFA_SIGNALING_VIA_NFKB	198	0.584611	1.92891	1.44235e-09	7.21176e-09	3.49201e-09	3781	tags=55%, list=23%, signal=43%	CSF2/DUSP4/CXCL11/G0S2/ICAM1/PMEPA1/TNF/CXCL2/AREG/NR4A3/FOSB/SERPINE1/OLR1/IL1A/INHBA/GFPT2/CCL2/CCN1/SIK1/LIF/KLF2/PLAU/DUSP5/PLAUR/CD69/GADD45B/CXCL3/PTX3/CXCL10/GPR183/IL7R/DRAM1/BIRC3/CSF1/BMP2/CD80/SLC2A3/GEM/SDC4/PTGS2/CCL5/PTPRE/CCRL2/PLK2/DUSP1/CLCF1/TNFAIP6/EHD1/IL1B/CEBPB/BCL2A1/PHLDA2/IFIT2/KLF6/PER1/KLF10/NR4A1/IER5/SLC2A6/CCL4/TNFAIP3/IL15RA/TRAF1/SOCS3/STAT5A/IL6ST/NR4A2/ZC3H12A/LA…
HALLMARK_OXIDATIVE_PHOSPHORYLATION	HALLMARK_OXIDATIVE_PHOSPHORYLATION	199	-0.431798	-1.94047	2.25312e-08	1.02414e-07	4.95901e-08	6313	tags=68%, list=38%, signal=43%	HTRA2/ATP5F1E/VDAC1/NDUFA9/CPT1A/SLC25A3/SLC25A6/ECI1/CASP7/SDHC/SLC25A12/MTRF1/SLC25A11/NDUFA4/SLC25A4/UQCRB/NDUFV1/ETFDH/OXA1L/GLUD1/IDH3B/MRPS15/AIFM1/NDUFS1/CS/POR/SUCLA2/NDUFA2/RETSAT/ECH1/ATP5PF/ATP6V1G1/ATP6V1E1/COX17/HCCS/NDUFC1/IMMT/HSD17B10/GRPEL1/UQCRC2/ATP5MG/HSPA9/MRPS30/NDUFV2/TOMM70/ATP5MC2/SUPV3L1/NDUFS3/MRPS11/ATP5F1A/ATP5PO/NDUFA5/UQCRC1/ATP1B1/NDUFC2/NDUFB2/UQCRFS1/UQCRQ/TIMM9/…
HALLMARK_G2M_CHECKPOINT	HALLMARK_G2M_CHECKPOINT	199	-0.430522	-1.93473	2.65969e-08	1.1082e-07	5.36604e-08	6631	tags=68%, list=40%, signal=41%	ODF2/UCK2/CDK4/MARCKS/HOXC10/MYBL2/KATNA1/UBE2C/PLK1/G3BP1/SLC38A1/SMARCC1/FANCC/BARD1/E2F1/CASP8AP2/HNRNPU/HIRA/CUL5/AURKA/SFPQ/STIL/CDC27/NSD2/EWSR1/KPNB1/RBM14/SLC7A1/HUS1/SAP30/STAG1/RAD23B/PRMT5/CHEK1/MCM6/RACGAP1/NEK2/NCL/POLE/TOP2A/HNRNPD/ILF3/TMPO/PRIM2/SRSF1/KIF4A/YTHDC1/CUL4A/SYNCRIP/LBR/ESPL1/E2F2/BUB1/NDC80/KIF23/MCM3/LMNB1/UBE2S/SQLE/SUV39H1/CDC7/SMAD3/UPF1/TPX2/CCNT1/PLK4/FOXN3/H2AX…
HALLMARK_INTERFERON_ALPHA_RESPONSE	HALLMARK_INTERFERON_ALPHA_RESPONSE	97	0.634969	2.00038	2.42246e-07	9.31715e-07	4.51146e-07	4488	tags=67%, list=27%, signal=49%	CXCL11/BATF2/CD74/CXCL10/EPSTI1/IFITM2/CSF1/IL4R/IRF7/C1S/CCRL2/OASL/HELZ2/IFITM3/IFI44L/SAMD9L/IFIT3/UBA7/HLA-C/ISG15/IFIT2/IFI30/LY6E/RSAD2/TENT5A/GBP4/IFI44/IRF1/SELL/CMPK2/PSMB9/WARS1/SP110/B2M/RIPK2/IL15/CD47/LAP3/ISG20/DDX60/BST2/IFIH1/IFITM1/TAP1/TRIM5/IL7/PSMB8/IFI35/GMPR/PARP12/UBE2L6/TMEM140/GBP2/NCOA7/USP18/TXNIP/TRIM21/OGFR/SAMD9/PARP14/PROCR/DHX58/MX1/STAT2/HERC6
HALLMARK_IL6_JAK_STAT3_SIGNALING	HALLMARK_IL6_JAK_STAT3_SIGNALING	82	0.649373	2.01463	6.62778e-07	2.36706e-06	1.14616e-06	3635	tags=60%, list=22%, signal=47%	PLA2G2A/CSF2/ITGB3/CXCL11/TNF/CCL7/CXCL13/A2M/TNFRSF12A/EBI3/CSF3R/CSF2RA/CXCL3/CD14/CXCL10/TNFRSF1B/CCR1/IL12RB1/CSF1/LTB/ACVRL1/IL4R/PIK3R5/IL2RG/IL1B/IL3RA/IL1R1/ITGA4/IL2RA/IL15RA/SOCS3/IL6ST/IL17RB/IRF1/TLR2/OSMR/FAS/CXCL9/TGFB1/CD36/CSF2RB/PDGFC/IL7/STAT1/CD38/PIM1/IL18R1/LEPR/JUN
HALLMARK_PANCREAS_BETA_CELLS	HALLMARK_PANCREAS_BETA_CELLS	22	0.851779	2.12219	8.98065e-07	2.99355e-06	1.44951e-06	305	tags=36%, list=2%, signal=36%	SCGN/NEUROG3/CHGA/PCSK1/FOXA2/INSM1/SYT13/DPP4
HALLMARK_IL2_STAT5_SIGNALING	HALLMARK_IL2_STAT5_SIGNALING	192	0.515436	1.69687	1.02778e-05	3.21182e-05	1.5552e-05	3916	tags=48%, list=24%, signal=37%	IL1RL1/CSF2/AGER/NT5E/TGM2/APLP1/MUC1/PTGER2/PTH1R/SLC39A8/SHE/ADAM19/LIF/CCR4/GADD45B/CXCL10/TNFRSF1B/BATF/IRF8/TLR7/CSF1/BMP2/SLC2A3/LTB/CD79B/RHOH/COL6A1/IL10RA/IL4R/IL2RB/CST7/CTLA4/CISH/ENPP1/FGL2/ICOS/TNFSF11/RGS16/IRF4/ABCB1/SYT11/TNFRSF4/NRP1/IFITM3/IL10/GPR65/SPRY4/GLIPR2/SELP/CD86/KLF6/IL3RA/BATF3/IL2RA/CDKN1C/HOPX/TNFRSF8/GALM/CTSZ/TRAF1/PLIN2/SMPDL3A/GBP4/TNFRSF9/CD48/SERPINB6/SELL/ST…
HALLMARK_APICAL_JUNCTION	HALLMARK_APICAL_JUNCTION	177	0.487454	1.59133	0.00022215	0.000642354	0.000311034	3387	tags=40%, list=21%, signal=32%	CLDN6/CLDN18/CLDN9/ICAM1/CADM3/ITGA3/TGFBI/AMIGO2/FLNC/LAMC2/CDH6/ADAMTS5/MMP2/ICAM5/MMP9/ACTG2/FBN1/CD209/ALOX15B/NEXN/MYL9/TSPAN4/FYB1/RHOF/CDH11/THY1/PCDH1/ICAM2/ITGA9/PTPRC/CDH3/RAC2/ACTN1/RRAS/ARHGEF6/PECAM1/GRB7/COL16A1/KCNH2/VWF/LAMA3/VAV2/CD86/CLDN11/CD34/SDC3/VCAN/SIRPA/JAM3/ITGB1/ZYX/VCAM1/TRAF1/BMP1/MSN/LAMB3/CLDN5/IRS1/CERCAM/COL17A1/GNAI2/PARVA/VASP/NECTIN2/NFASC/TNFRSF11B/ACTB/RSU1/…
HALLMARK_MYC_TARGETS_V2	HALLMARK_MYC_TARGETS_V2	58	-0.502824	-1.88914	0.000231247	0.000642354	0.000311034	5745	tags=67%, list=35%, signal=44%	RRP9/AIMP2/PHB/PUS1/WDR74/EXOSC5/NPM1/LAS1L/TBRG4/NOP2/SUPV3L1/PA2G4/GNL3/NOP56/IMP4/PLK4/MCM4/PRMT3/SLC29A2/NOP16/SORD/DDX18/MPHOSPH10/RABEPK/TFB2M/HSPD1/FARSA/MCM5/PPAN/DCTPP1/WDR43/UNG/PES1/MYC/RCL1/HSPE1/NDUFAF4/TMEM97/HK2
HALLMARK_ANGIOGENESIS	HALLMARK_ANGIOGENESIS	32	0.696144	1.84579	0.000287836	0.000757463	0.000366771	3283	tags=59%, list=20%, signal=48%	VTN/APOH/LPL/OLR1/COL3A1/TIMP1/COL5A2/POSTN/SLCO2A1/KCNJ8/NRP1/VAV2/VCAN/FSTL1/PDGFA/STC1/S100A4/ITGAV/LUM
HALLMARK_TGF_BETA_SIGNALING	HALLMARK_TGF_BETA_SIGNALING	52	0.588881	1.72436	0.00251049	0.00627622	0.00303901	4639	tags=52%, list=28%, signal=37%	PMEPA1/SERPINE1/THBS1/LTBP2/ENG/BMP2/BCAR3/SMAD7/KLF10/CDKN1C/RAB31/TGFB1/SKI/NCOR2/HIPK2/SMAD6/PPP1R15A/FURIN/ID2/ID3/SLC20A1/TGFBR1/ID1/BMPR2/RHOA/JUNB/IFNGR2
HALLMARK_UV_RESPONSE_DN	HALLMARK_UV_RESPONSE_DN	139	0.472248	1.53345	0.00383876	0.00913991	0.00442564	3227	tags=33%, list=20%, signal=27%	ITGB3/DLC1/SERPINE1/MT1E/INPP4B/CCN1/SYNE1/COL1A1/COL1A2/COL3A1/FHL2/HAS2/COL5A2/FBLN5/CAV1/TGFBR2/PDGFRB/COL11A1/DAB2/ICA1/CELF2/PMP22/DUSP1/CITED2/PTPRM/SMAD7/NRP1/APBB2/VAV2/PTPN21/PRKCA/RBPMS/DDAH1/GRK5/ERBB2/IRS1/PIK3CD/EFEMP1/KIT/GCNT1/SYNJ2/RGS4/CAP2/F3/PTGFR/FYN
HALLMARK_APOPTOSIS	HALLMARK_APOPTOSIS	157	0.455629	1.48287	0.00418408	0.00940206	0.00455258	3816	tags=39%, list=23%, signal=31%	EREG/TIMP3/TNF/IGFBP6/IL1A/TNFRSF12A/HGF/TIMP1/MMP2/BGN/CAV1/CD69/GADD45B/TGFB2/CD14/PDGFRB/BIRC3/GPX3/BMP2/TIMP2/DPYD/CLU/SMAD7/BMF/IFITM3/PLCB2/IL1B/ANKH/PRF1/CD2/PLPPR4/RARA/ERBB2/IRF1/FAS/SOD2/F2R/KRT18/ISG20/PLAT/TAP1/EGR3/CFLAR/DNAJC3/DCN/FASLG/GADD45A/CDKN1A/LUM/RHOB/CD38/CCND1/PEA15/NEFH/CYLD/MCL1/CASP4/IL18/JUN/SLC20A1/APP/TXNIP
HALLMARK_MYOGENESIS	HALLMARK_MYOGENESIS	160	0.456152	1.48674	0.00432495	0.00940206	0.00455258	3608	tags=44%, list=22%, signal=34%	SPDEF/TNNC1/DES/SOD3/MB/TNNC2/GJA5/COL1A1/COL3A1/CACNA1H/COL6A2/CHRNA1/AEBP1/TAGLN/COL6A3/SORBS1/COL15A1/KIFC3/GADD45B/PTGIS/GPX3/SPARC/SGCA/MRAS/MEF2C/CASQ2/APLNR/IGFBP7/PDLIM7/LAMA2/TPM2/CHRNB1/CLU/ACHE/SGCD/KCNH2/COL4A2/DENND2B/LSP1/AGRN/MYLK/HSPB8/ITGB1/TNNT1/PTP4A3/SSPN/FHL1/AK1/PDE4DIP/NAV2/CFD/FABP3/ITGA7/BIN1/CNN3/BDKRB2/TGFB1/CD36/DMPK/CDKN1A/SGCG/MYH9/BHLHE40/ADAM12/NCAM1/OCEL1/DAPK2/MY…
HALLMARK_MTORC1_SIGNALING	HALLMARK_MTORC1_SIGNALING	199	-0.291042	-1.30792	0.00985085	0.0205226	0.00993726	4467	tags=40%, list=27%, signal=29%	BUB1/PSMD14/EIF2S2/SCD/IDI1/GSK3B/G6PD/TUBG1/NIBAN1/NUFIP1/SQLE/STARD4/PSME3/IGFBP5/SHMT2/TPI1/PGK1/ADD3/RRM2/MCM4/MCM2/TCEA1/EBP/GOT1/ADIPOR2/PSMC2/PSMA4/CACYBP/NUP205/SORD/ACTR3/PSMD12/INSIG1/GAPDH/IDH1/MTHFD2L/HSPD1/PITPNB/SERP1/MTHFD2/HMGCR/UNG/PDK1/SC5D/RPA1/GLA/DDX39A/DHCR7/DDIT3/HPRT1/HSPE1/GMPS/ATP5MC1/PRDX1/PNO1/VLDLR/TM7SF2/SLC1A4/CDC25A/HMGCS1/SLC2A1/GSR/TXNRD1/ASNS/NAMPT/ELOVL6/TMEM97…
HALLMARK_BILE_ACID_METABOLISM	HALLMARK_BILE_ACID_METABOLISM	91	0.471562	1.47242	0.0171638	0.0343276	0.0166218	441	tags=7%, list=3%, signal=6%	APOA1/HSD3B1/NR0B2/ABCA3/ACSL5/ABCA8
HALLMARK_HYPOXIA	HALLMARK_HYPOXIA	186	0.416395	1.36781	0.0261506	0.0502897	0.0243508	3922	tags=39%, list=24%, signal=30%	TKTL1/INHA/HOXB9/TGM2/AKAP12/MT2A/HAS1/SERPINE1/TGFBI/MT1E/SELENBP1/COL5A1/CCN1/ERRFI1/ETS1/FBP1/BGN/CAV1/PLAUR/CCN2/CAVIN3/PDGFB/SLC2A3/SDC4/PPARGC1A/ANGPTL4/DUSP1/CITED2/CCN5/CXCR4/TGFB3/GLRX/TMEM45A/KLF6/SDC3/PRKCA/KLF7/CDKN1C/TNFAIP3/PLIN2/AMPD3/SLC2A5/B4GALNT2/PAM/STC1/CAVIN1/GPC4/NDST1/CP/ISG20/PGM1/F3/P4HA2/DDIT4/PFKFB3/DCN/S100A4/NOCT/CDKN1A/PIM1/MYH9/BHLHE40/FOS/PPP1R15A/ZFP36/LOX/JUN/HS…
HALLMARK_ESTROGEN_RESPONSE_EARLY	HALLMARK_ESTROGEN_RESPONSE_EARLY	191	0.414809	1.36517	0.0272537	0.0504698	0.024438	3414	tags=36%, list=21%, signal=29%	MLPH/TGM2/ABCA3/ALDH3B1/SYT12/AREG/DLC1/MUC1/KCNK5/TFF3/TFF1/TMPRSS3/SEMA3B/FHL2/TJP3/RAB17/CLIC3/OLFML3/SLC7A2/RPS6KA2/PODXL/PRSS23/SEC14L2/CISH/FCMR/CCN5/PDLIM3/PAPSS2/GAB2/KLF10/CYP26B1/PTGES/SLC24A3/HSPB8/NBL1/CXCL12/RET/MICB/SH3BP5/OPN3/RAB31/IL6ST/FKBP5/IL17RB/RARA/TUBB2B/NAV2/FOXC1/IGFBP4/RHOBTB3/SLC37A1/WWC1/ELOVL2/KRT18/SLC1A1/TTC39A/MYOF/ANXA9/RHOD/EGR3/CBFA2T3/MYBL1/NCOR2/P2RY2/CCND1/B…
