# Supplementary figures and images for: A pyroptosis expression pattern score predicts prognosis and immune microenvironment of lung squamous cell carcinoma
Source: Frontiers journal article supplement (doi:10.3389/fgene.2022.996444), 2022-11-10

A

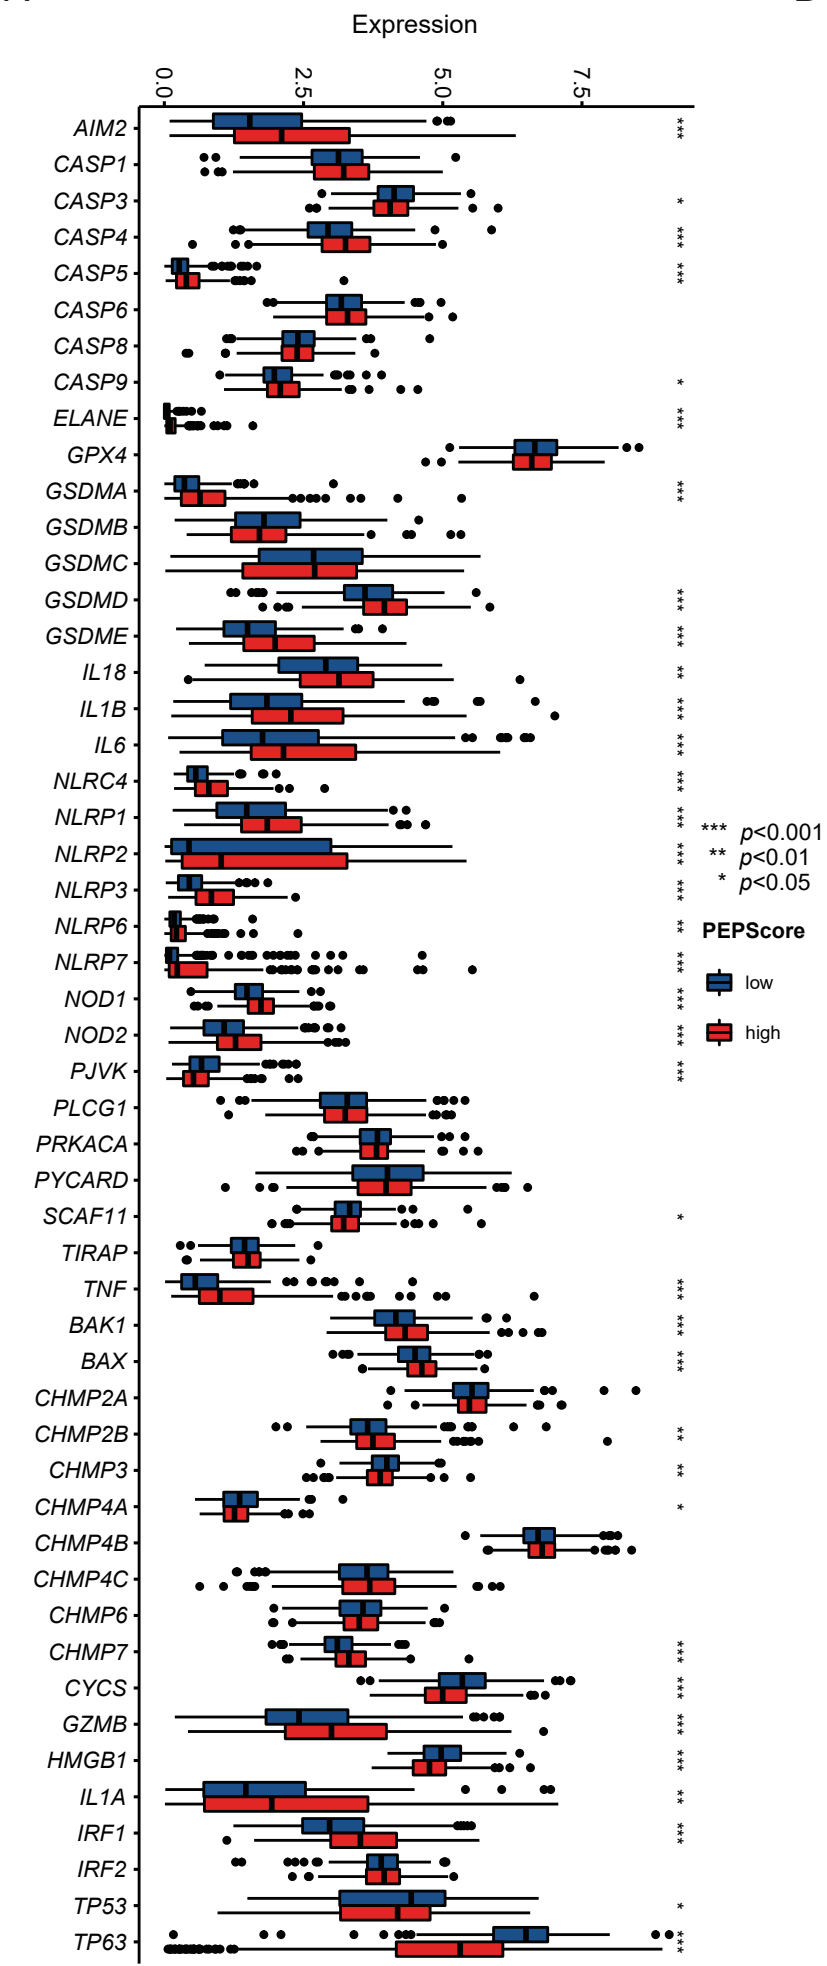

B

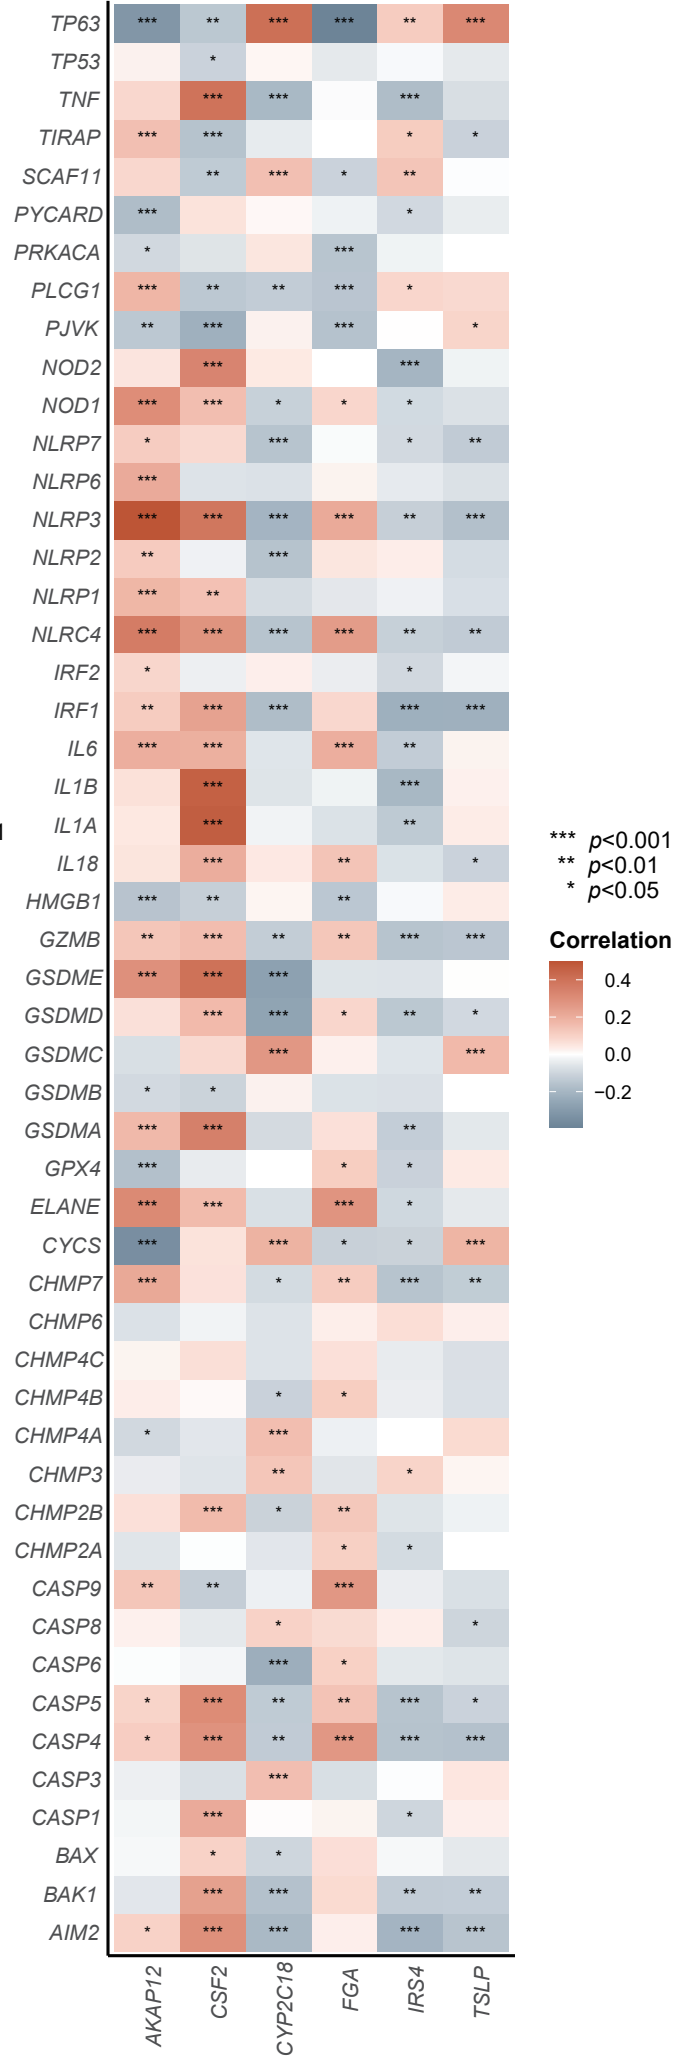

Supplement: Data_Sheet_1.zip [file Data_Sheet_1.zip]

A

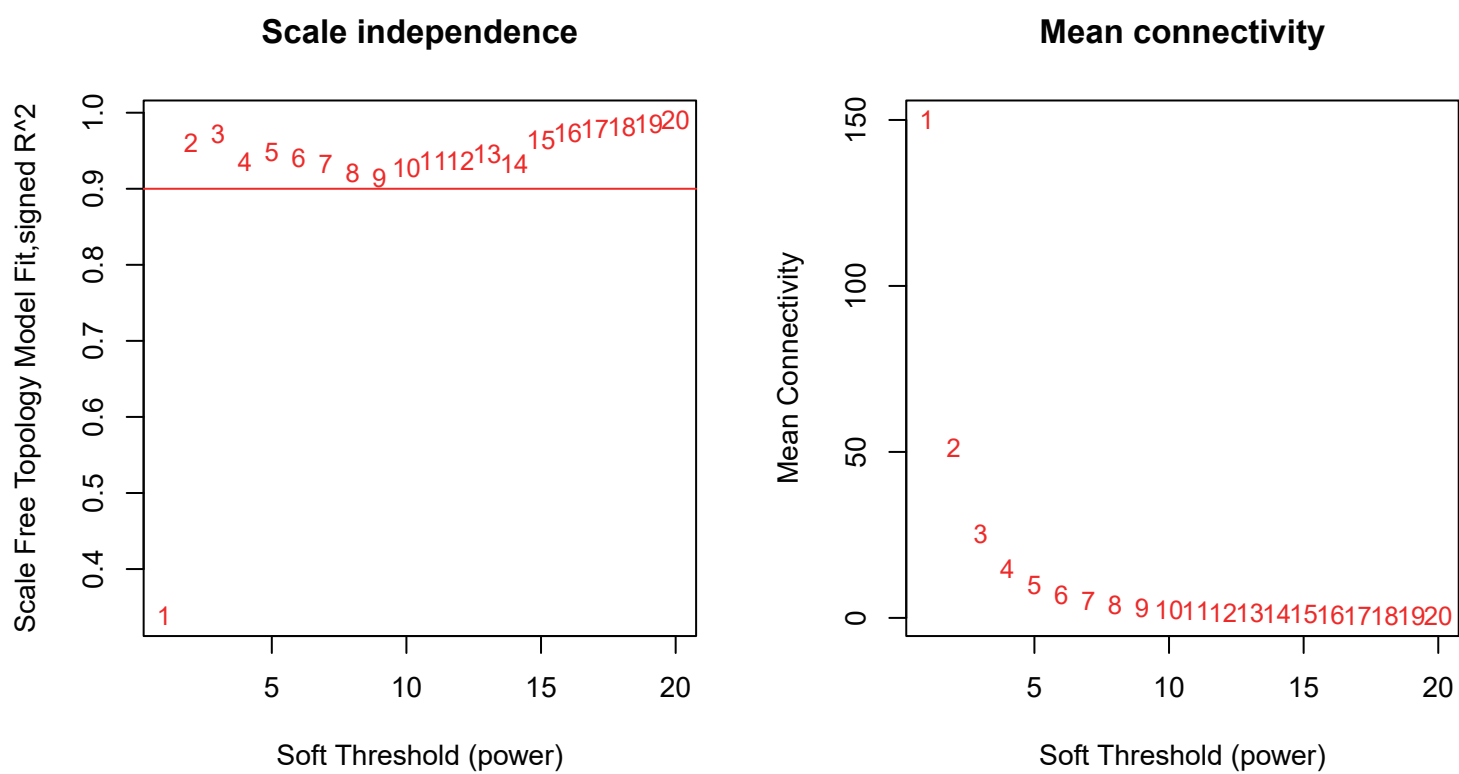

B

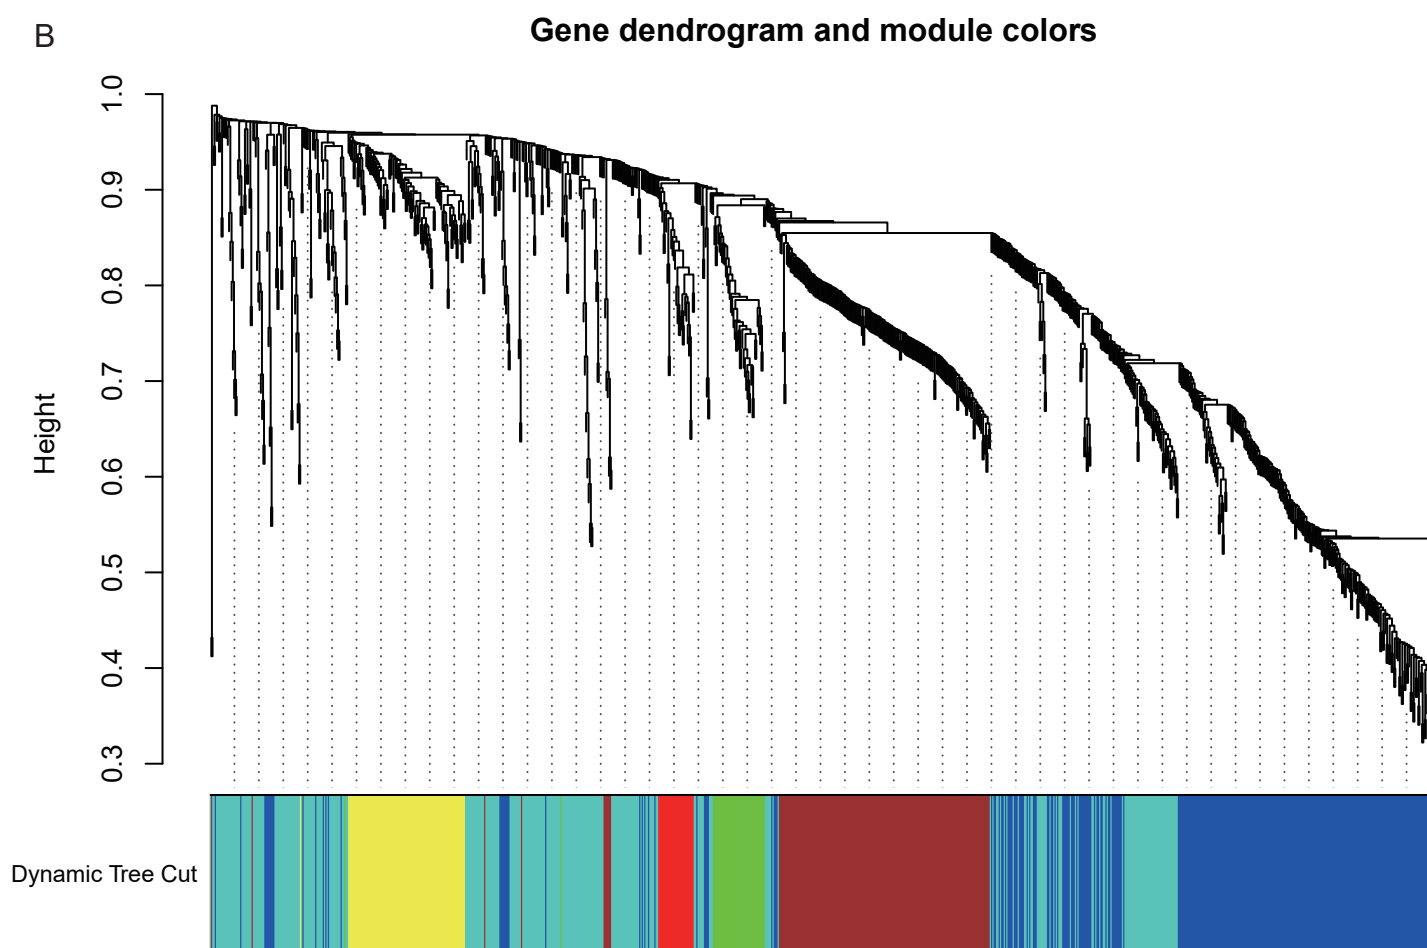

Supplement: Data_Sheet_1.zip [file Data_Sheet_1.zip]

A

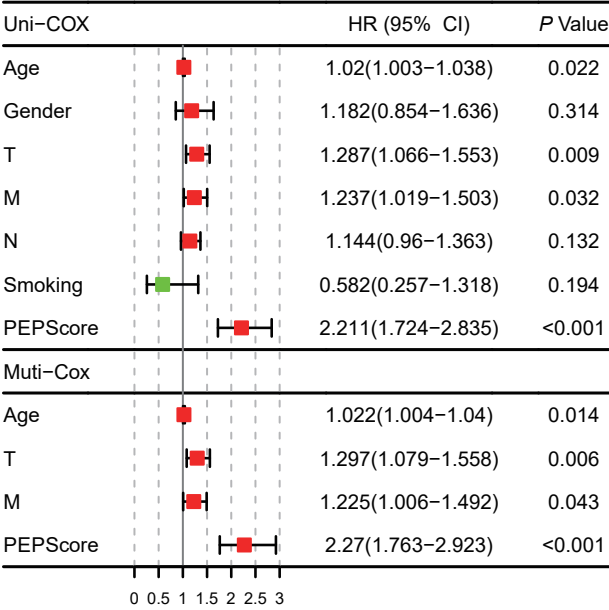

B

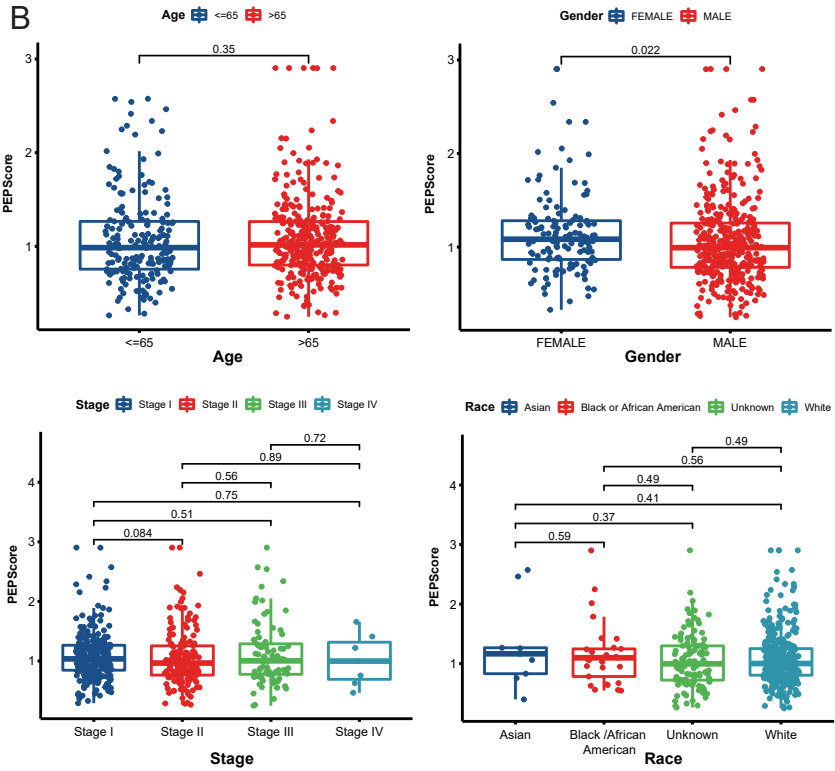

C

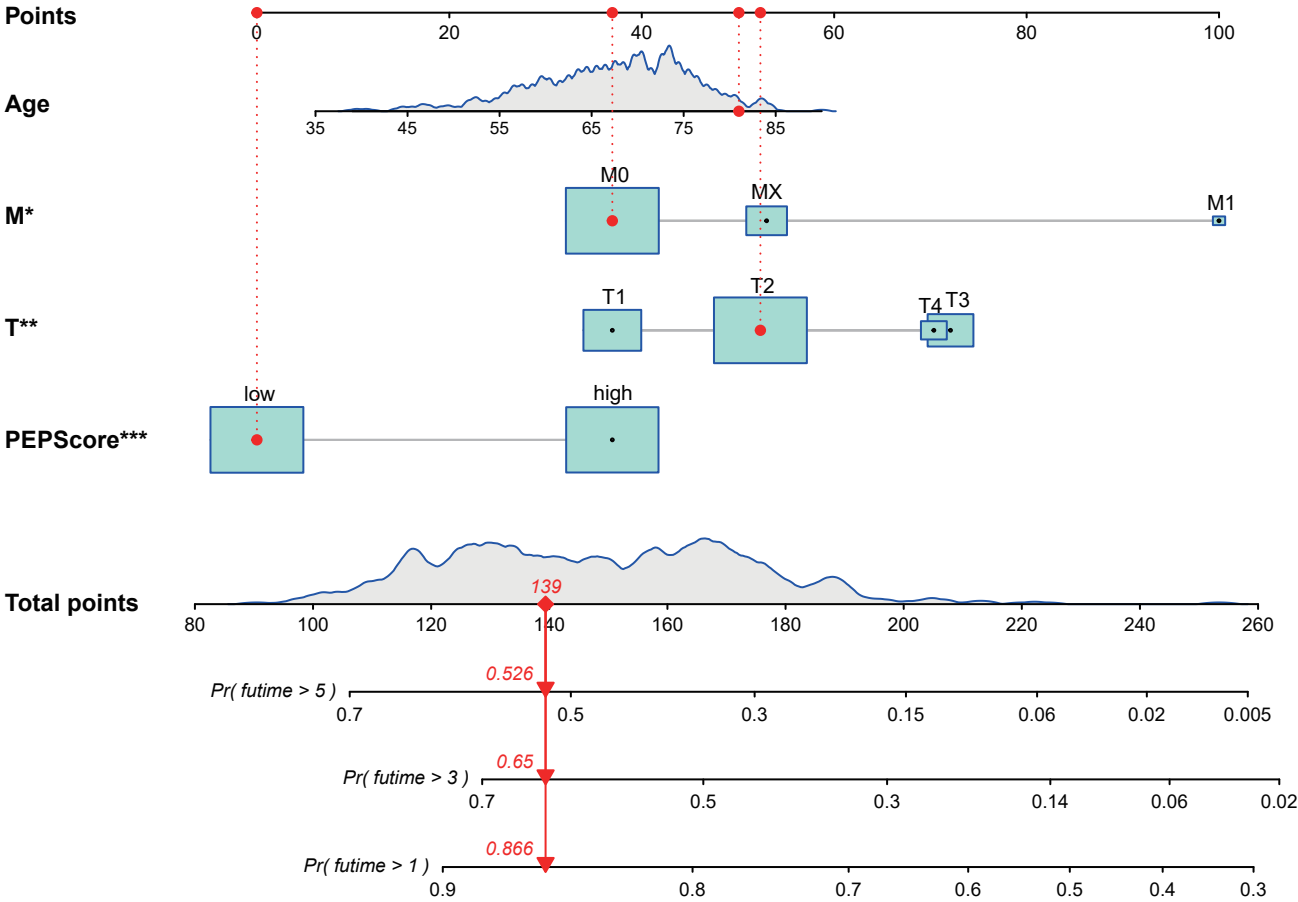

D

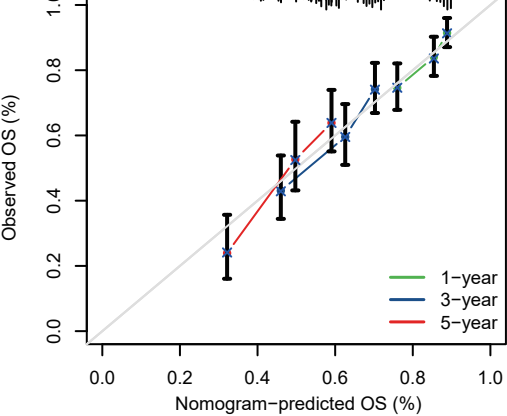

E

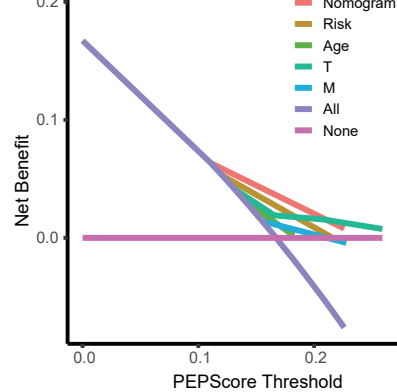

F

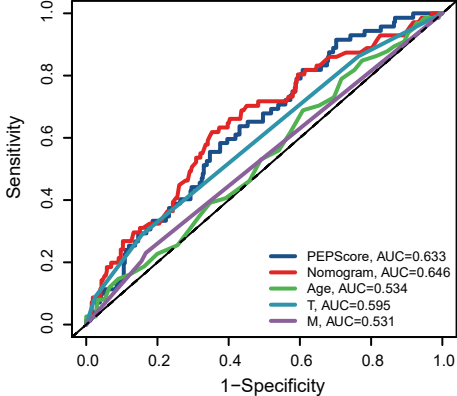

Supplement: Data_Sheet_1.zip [file Data_Sheet_1.zip]

A

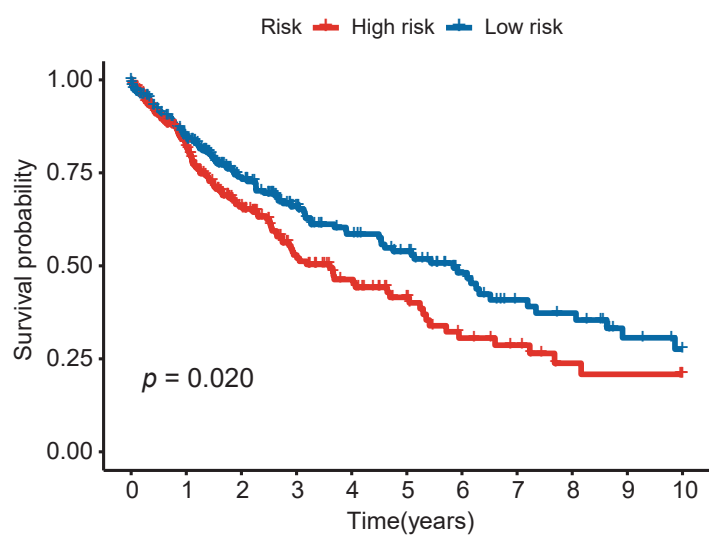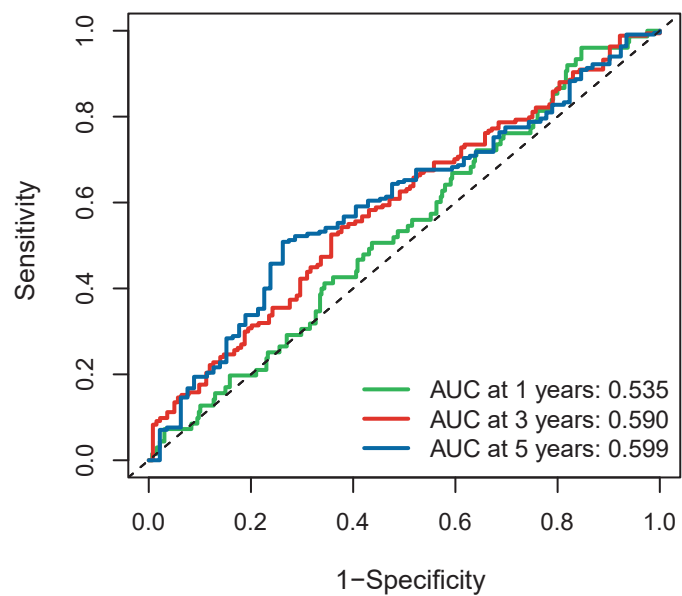

B

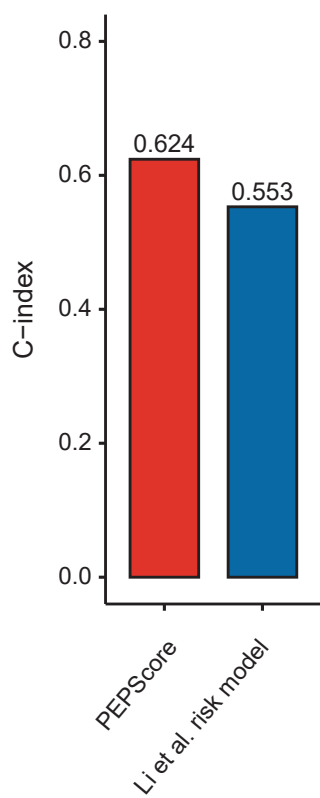

Supplement: Data_Sheet_1.zip [file Data_Sheet_1.zip]

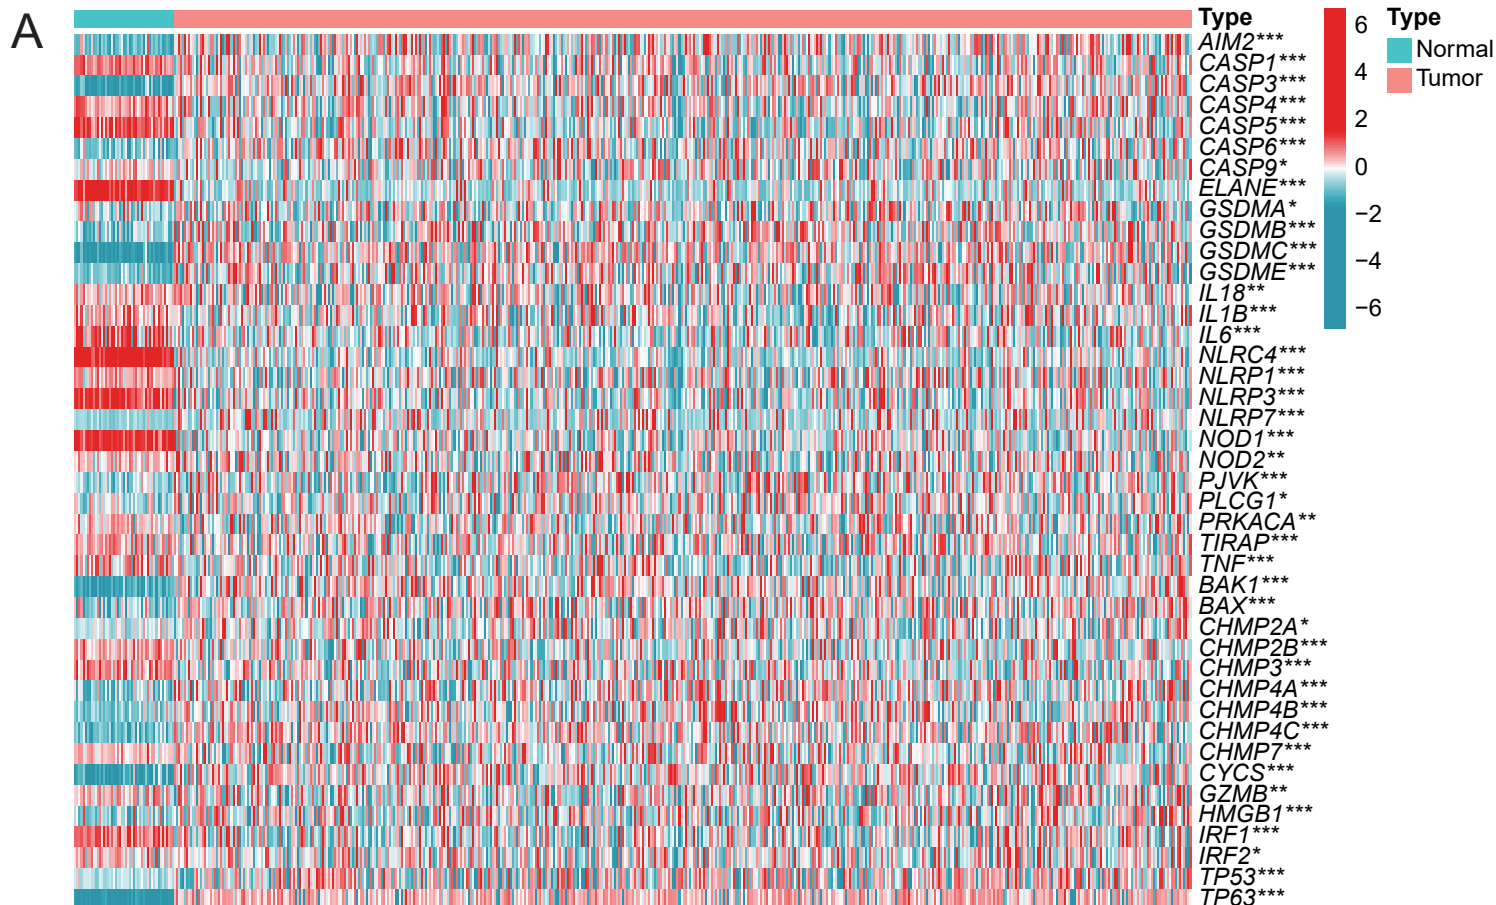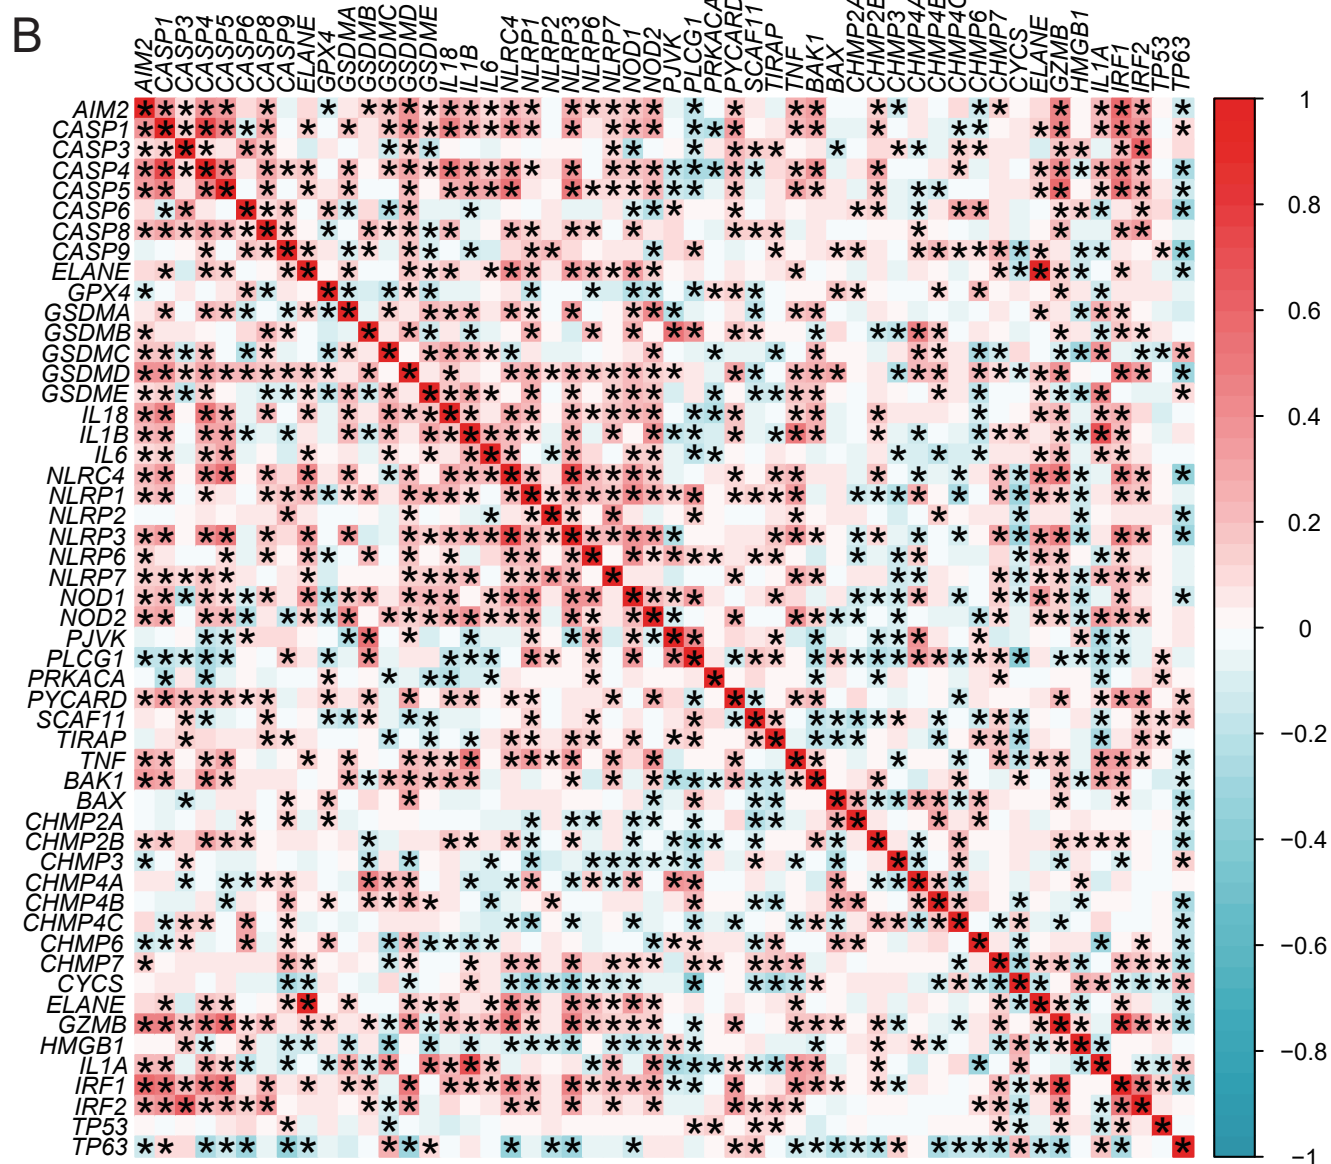

Supplement: Data_Sheet_1.zip [file Data_Sheet_1.zip]

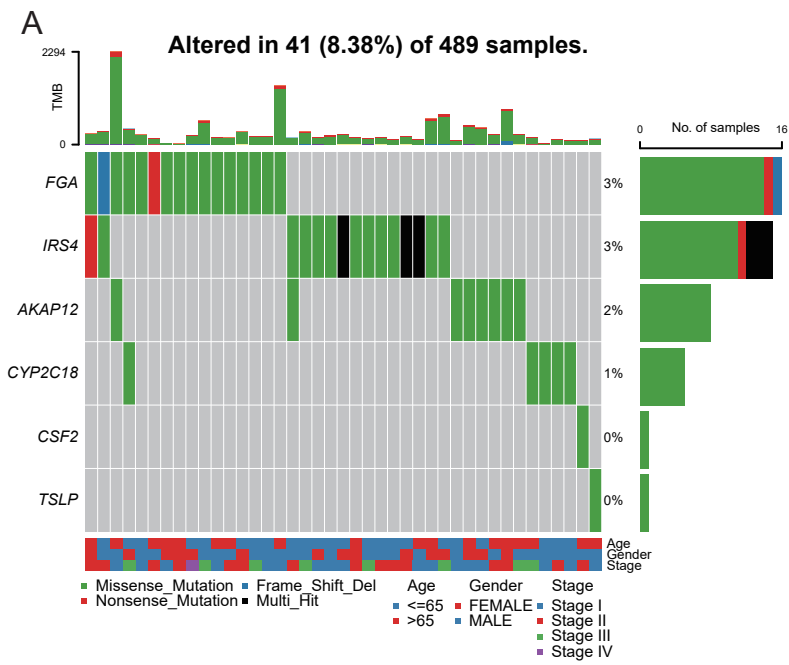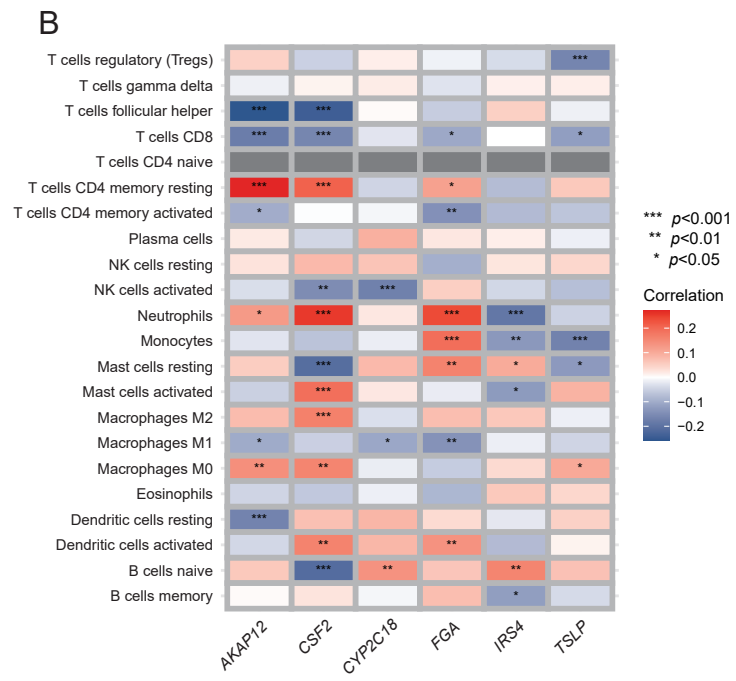

Supplement: Data_Sheet_1.zip [file Data_Sheet_1.zip]

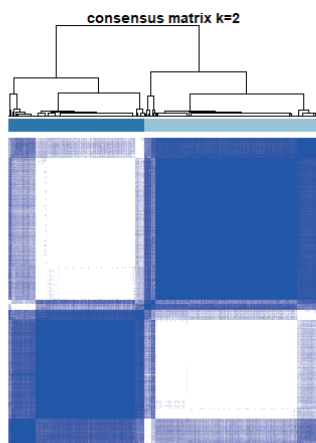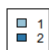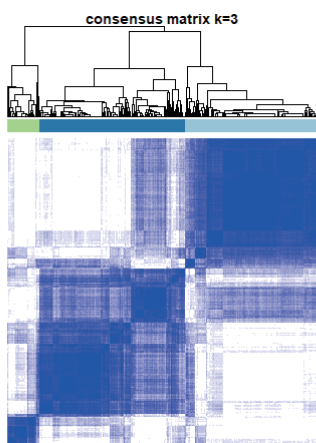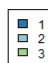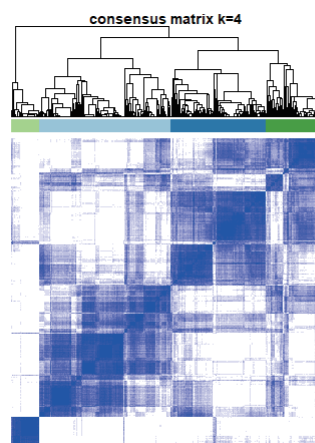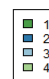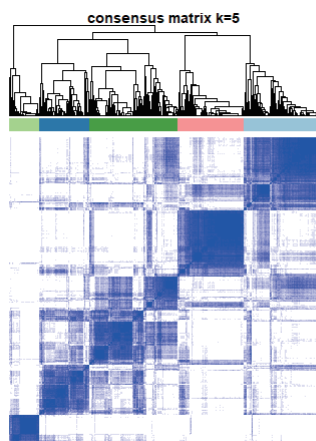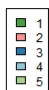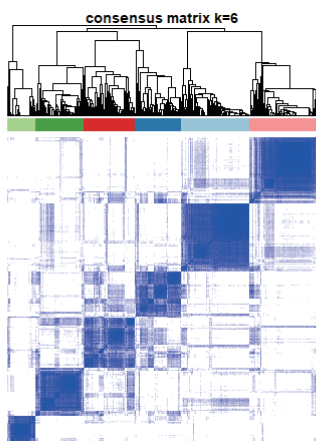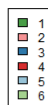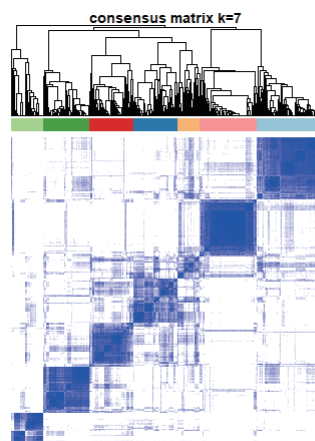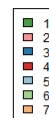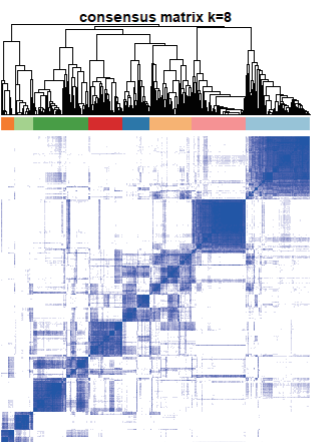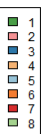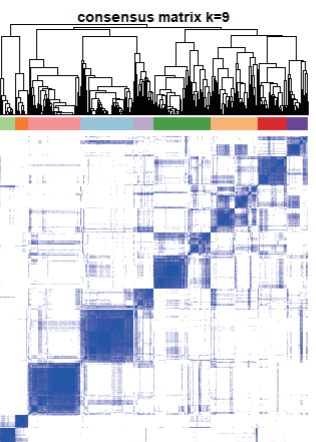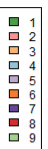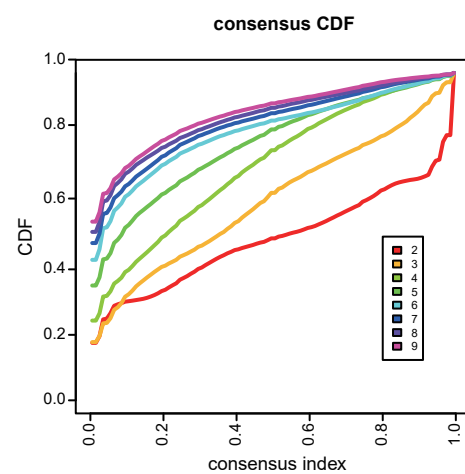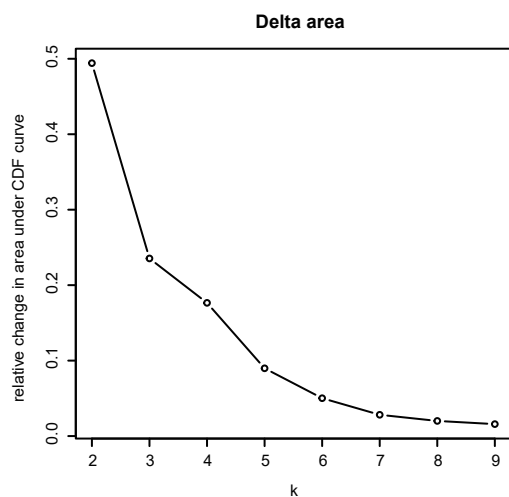

Supplement: Data_Sheet_1.zip [file Data_Sheet_1.zip]

Checkpoint

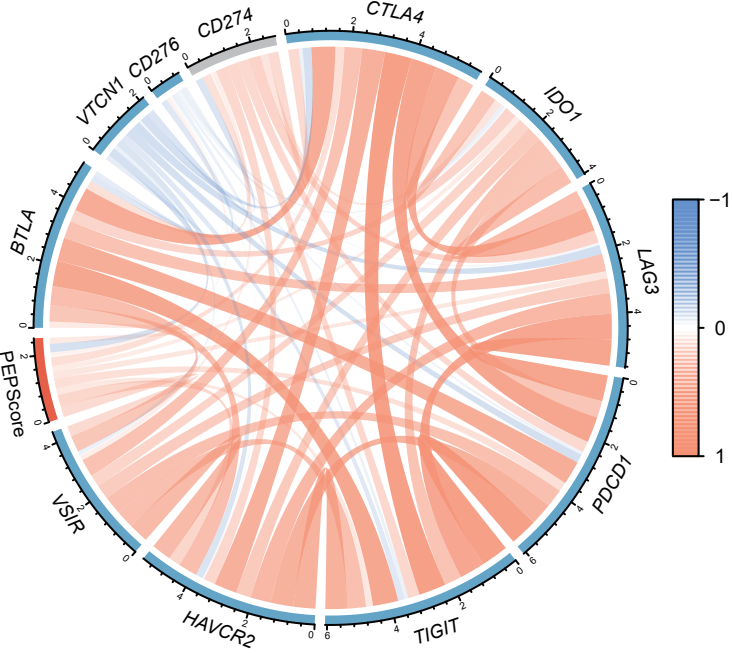

Chemokine

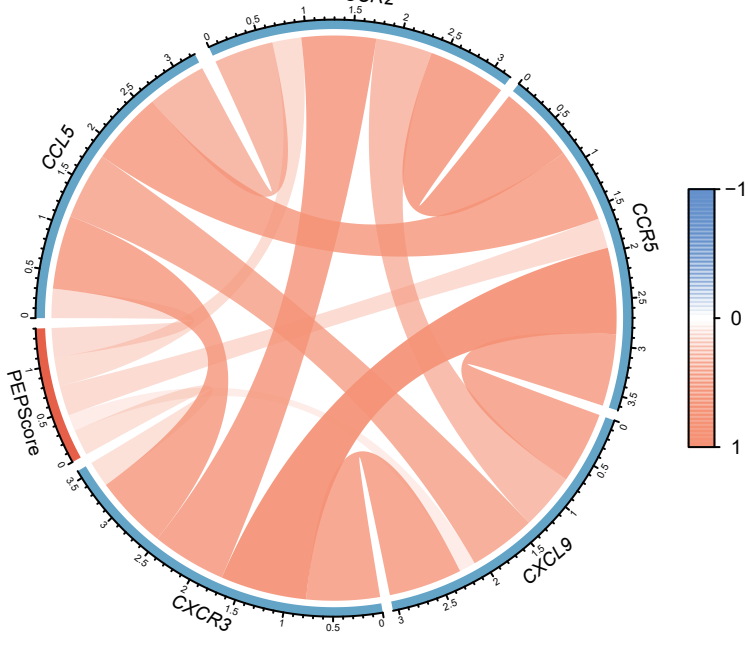

Supplement: Data_Sheet_1.zip [file Data_Sheet_1.zip]
